# Supplementary material for: New Insights in Bladder Cancer Diagnosis: Urinary miRNAs and Proteins
Source: Med Sci (Basel). 2018 Dec 7;6(4):113. doi: 10.3390/medsci6040113 (PMC6318758; doi:10.3390/medsci6040113)
Supplement: Supplementary file 1 [file medsci-06-00113-s001.xlsx]

## Sheet: Table S1 miRNA targets
	miRNA	Species (miRNA)	Target Gene	Experiments	Support Type	References (PMID)
	hsa-miR-122-5p	Homo sapiens	AACS	Luciferase reporter assay//qRT-PCR	Functional MTI	19296470
	hsa-miR-183-5p	Homo sapiens	AANAT	Luciferase reporter assay//qRT-PCR	Functional MTI	24423866
	hsa-miR-148a-5p	Homo sapiens	ABCA1	Luciferase reporter assay//Northern blot//qRT-PCR//Western blot	Functional MTI	26437365
	hsa-miR-451a	Homo sapiens	ABCB1	qRT-PCR//Luciferase reporter assay//Western blot	Functional MTI	18645025
	hsa-miR-145-5p	Homo sapiens	ABCC1	Luciferase reporter assay	Functional MTI	25354783
	hsa-miR-142-3p	Homo sapiens	ABCG2	Luciferase reporter assay//Western blot	Functional MTI	23619912
	hsa-miR-145-5p	Homo sapiens	ABHD17C	Reporter assay;Microarray	Functional MTI	21351259
	hsa-miR-29a-3p	Homo sapiens	ABL1	Luciferase reporter assay	Functional MTI	23428668
	hsa-miR-125a-5p	Homo sapiens	ABL2	Luciferase reporter assay//qRT-PCR//Western blot	Functional MTI	26766902
	hsa-miR-145-5p	Homo sapiens	ABRACL	Reporter assay;Microarray	Functional MTI	21351259
	hsa-miR-125b-5p	Homo sapiens	ABTB1	Luciferase reporter assay	Functional MTI	22689670
	hsa-miR-100-5p	Homo sapiens	ACKR3	Luciferase reporter assay//qRT-PCR//Western blot	Functional MTI	27035873
	hsa-miR-22-3p	Homo sapiens	ACLY	Luciferase reporter assay//qRT-PCR//Western blot	Functional MTI	27317765
	hsa-miR-205-5p	Homo sapiens	ACSL1	Luciferase reporter assay//qRT-PCR//Western blot	Functional MTI	24462768
	hsa-miR-205-5p	Homo sapiens	ACSL4	Luciferase reporter assay//qRT-PCR//Western blot	Functional MTI	24576478
	hsa-let-7b-5p	Homo sapiens	ACTG1	Luciferase reporter assay//Reporter assay;Other	Non-Functional MTI	15131085
	hsa-miR-155-5p	Homo sapiens	ACTR2	Reporter assay;Other	Non-Functional MTI	20584899
	hsa-let-7b-5p	Homo sapiens	ACVR1	Luciferase reporter assay//Microarray//qRT-PCR	Non-Functional MTI	22995917
	hsa-miR-135b-5p	Homo sapiens	ACVR1B	ChIP-seq//Luciferase reporter assay//qRT-PCR//Western blot	Functional MTI	24802670
	hsa-miR-122-5p	Homo sapiens	ACVR1C	Luciferase reporter assay//Reporter assay	Non-Functional MTI	21224400
	hsa-miR-16-5p	Homo sapiens	ACVR2A	Luciferase reporter assay//Western blot	Functional MTI	20216554
	hsa-miR-192-5p	Homo sapiens	ACVR2B	Luciferase reporter assay//Western blot	Functional MTI	22431721
	hsa-miR-140-5p	Homo sapiens	ADA	Luciferase reporter assay//Western blot	Functional MTI	24530397
	hsa-miR-122-5p	Homo sapiens	ADAM10	Luciferase reporter assay//qRT-PCR//Western blot	Functional MTI	19726678
	hsa-miR-29a-3p	Homo sapiens	ADAM12	Luciferase reporter assay//qRT-PCR//Western blot	Functional MTI	25886595
	hsa-miR-122-5p	Homo sapiens	ADAM17	Luciferase reporter assay//qRT-PCR	Functional MTI	19296470
	hsa-miR-27b-5p	Homo sapiens	ADAM19	Luciferase reporter assay//Western blot	Functional MTI	26473412
	hsa-miR-126-5p	Homo sapiens	ADAM9	Luciferase reporter assay	Functional MTI	23437250
	hsa-miR-29a-3p	Homo sapiens	ADAMTS9	Luciferase reporter assay//Microarray//Northern blot//qRT-PCR	Functional MTI	20971881
	hsa-miR-182-5p	Homo sapiens	ADCY6	Luciferase reporter assay	Functional MTI	17597072
	hsa-miR-145-5p	Homo sapiens	ADD3	Flow//Luciferase reporter assay//qRT-PCR//Western blot	Functional MTI	23814265
	hsa-miR-375	Homo sapiens	ADIPOR2	Reporter assay	Functional MTI	15806104
	hsa-miR-16-5p	Homo sapiens	ADORA2A	Luciferase reporter assay//qRT-PCR//Western blot	Functional MTI	27476546
	hsa-let-7b-5p	Homo sapiens	AGO1	Immunohistochemistry//Immunoprecipitaion//Luciferase reporter assay//Northern blot//qRT-PCR//Western blot	Functional MTI	23426184
	hsa-miR-15b-5p	Homo sapiens	AGO2	ELISA//Immunofluorescence//Luciferase reporter assay//qRT-PCR//Western blot	Functional MTI	27208409
	hsa-miR-155-5p	Homo sapiens	AGO4	Reporter assay;Other	Functional MTI	20584899
	hsa-miR-155-5p	Homo sapiens	AGTR1	Luciferase reporter assay//Reporter assay	Functional MTI	17668390
	hsa-miR-29a-3p	Homo sapiens	AHR	Luciferase reporter assay//qRT-PCR//Western blot	Functional MTI	26246194
	hsa-miR-125b-5p	Homo sapiens	AHRR	Immunoblot//Luciferase reporter assay	Functional MTI	24176857
	hsa-miR-34a-5p	Homo sapiens	AIP	Immunohistochemistry//Luciferase reporter assay//qRT-PCR	Functional MTI	25658813
	hsa-miR-183-5p	Homo sapiens	AKAP12	Immunohistochemistry//Luciferase reporter assay//Microarray//qRT-PCR//Western blot	Functional MTI	20979053
	hsa-miR-145-5p	Homo sapiens	AKR1B10	Reporter assay;Microarray	Functional MTI	21351259
	hsa-miR-100-5p	Homo sapiens	AKT1	Luciferase reporter assay//Microarray//qRT-PCR//Western blot	Functional MTI	23724047
	hsa-let-7b-5p	Homo sapiens	AKT2	Luciferase reporter assay//qRT-PCR//Western blot	Functional MTI	25288334
	hsa-miR-122-5p	Homo sapiens	AKT3	Luciferase reporter assay//qRT-PCR	Functional MTI	19296470
	hsa-miR-192-5p	Homo sapiens	ALCAM	Immunohistochemistry//Luciferase reporter assay//Microarray//qRT-PCR//Western blot	Functional MTI	21119604
	hsa-miR-140-5p	Homo sapiens	ALDH1A1	Luciferase reporter assay//Western blot	Functional MTI	23752191
	hsa-miR-145-5p	Homo sapiens	ALDH3A1	Reporter assay;Microarray	Functional MTI	21351259
	hsa-miR-29a-3p	Homo sapiens	ALDH5A1	EMSA//Luciferase reporter assay//qRT-PCR//Western blot	Functional MTI	26428001
	hsa-miR-122-5p	Homo sapiens	ALDOA	Luciferase reporter assay//qRT-PCR	Functional MTI	19296470
	hsa-miR-96-5p	Homo sapiens	ALK	Luciferase reporter assay//qRT-PCR//Western blot	Functional MTI	22414602
	hsa-miR-125b-5p	Homo sapiens	ALOX5	Luciferase reporter assay//qRT-PCR//Western blot	Functional MTI	25589070
	hsa-miR-204-5p	Homo sapiens	ALPL	Luciferase reporter assay	Functional MTI	23472141
	hsa-miR-145-5p	Homo sapiens	ALPPL2	Reporter assay;Microarray	Functional MTI	21351259
	hsa-miR-26a-5p	Homo sapiens	AMACR	Luciferase reporter assay//qRT-PCR//Western blot	Functional MTI	24517338
	hsa-miR-155-5p	Homo sapiens	ANAPC16	Reporter assay;Other	Functional MTI	20584899
	hsa-miR-93-5p	Homo sapiens	ANG	Luciferase reporter assay//Western blot	Functional MTI	28401709
	hsa-miR-122-5p	Homo sapiens	ANK2	Luciferase reporter assay//qRT-PCR	Functional MTI	19296470
	hsa-miR-34a-5p	Homo sapiens	ANK3	Immunocytochemistry//Luciferase reporter assay//Western blot	Functional MTI	25623948
	hsa-miR-204-5p	Homo sapiens	ANKRD13A	Flow cytometry//Luciferase reporter assay//qRT-PCR//Western blot	Functional MTI	23620728
	hsa-miR-21-5p	Homo sapiens	ANKRD46	Immunoblot//Immunohistochemistry//Luciferase reporter assay//Microarray//qRT-PCR//Western blot	Functional MTI	21219636
	hsa-miR-424-5p	Homo sapiens	ANLN	Luciferase reporter assay	Functional MTI	19956200
	hsa-miR-21-5p	Homo sapiens	ANP32A	Luciferase reporter assay//qRT-PCR//Western blot	Functional MTI	21317927
	hsa-miR-122-5p	Homo sapiens	ANXA11	Luciferase reporter assay//qRT-PCR//Microarray	Functional MTI	19296470
	hsa-miR-155-5p	Homo sapiens	ANXA2	Immunocytochemistry//Immunohistochemistry//In situ hybridization//Luciferase reporter assay//Microarray//qRT-PCR//Western blot	Functional MTI	24604078
	hsa-miR-145-5p	Homo sapiens	AP1G1	Reporter assay;Microarray	Functional MTI	21351259
	hsa-miR-204-5p	Homo sapiens	AP1S2	Luciferase reporter assay//Microarray//qRT-PCR	Functional MTI	21282569
	hsa-miR-122-5p	Homo sapiens	AP3M2	Luciferase reporter assay//qRT-PCR	Functional MTI	19296470
	hsa-miR-155-5p	Homo sapiens	APAF1	Reporter assay;Other	Functional MTI	20584899
	hsa-miR-106b-5p	Homo sapiens	APC	Flow//Immunofluorescence//Luciferase reporter assay//qRT-PCR//Western blot	Functional MTI	23087084
	hsa-miR-145-5p	Homo sapiens	APH1A	Reporter assay;Microarray	Functional MTI	21351259
	hsa-miR-125b-5p	Homo sapiens	APLN	Luciferase reporter assay//Next Generation Sequencing (NGS)//qRT-PCR	Functional MTI	26585673
	hsa-miR-106b-5p	Homo sapiens	APP	Luciferase reporter assay//Western blot	Functional MTI	19110058
	hsa-miR-205-5p	Homo sapiens	AR	Immunoprecipitation//In situ hybridization//Luciferase reporter assay//Micorarray//QRTPCR//Wetsern blot	Functional MTI	23571738
	hsa-miR-200a-3p	Homo sapiens	AREG	ELISA//Immunohistochemistry//Immunoprecipitaion//Luciferase reporter assay//Microarray//qRT-PCR//Western blot	Functional MTI	24762440
	hsa-miR-145-5p	Homo sapiens	ARF6	qRT-PCR//Western blot//In situ hybridization//Luciferase reporter assay	Functional MTI	25253741
	hsa-miR-27b-5p	Homo sapiens	ARFGEF1	Luciferase reporter assay//Western blot	Functional MTI	26473412
	hsa-miR-155-5p	Homo sapiens	ARFIP1	Reporter assay;Other	Non-Functional MTI	20584899
	hsa-miR-16-5p	Homo sapiens	ARHGDIA	Immunohistochemistry//Luciferase reporter assay//Western blot	Functional MTI	26761212
	hsa-miR-34a-5p	Homo sapiens	ARHGDIB	Western blot//Luciferase reporter assay//	Functional MTI	23349340
	hsa-miR-155-5p	Homo sapiens	ARID2	Luciferase reporter assay	Functional MTI	18367535
	hsa-miR-125a-5p	Homo sapiens	ARID3A	Luciferase reporter assay//qRT-PCR//Western blot	Functional MTI	28408353
	hsa-miR-125b-5p	Homo sapiens	ARID3B	Luciferase reporter assay	Functional MTI	22307404
	hsa-miR-155-5p	Homo sapiens	ARL15	Reporter assay;Other	Functional MTI	20584899
	hsa-miR-16-5p	Homo sapiens	ARL2	Luciferase reporter assay//qRT-PCR//Western blot//Reporter assay;Microarray;Other	Functional MTI	21199864
	hsa-miR-26a-5p	Homo sapiens	ARL4C	Immunoblot//Luciferase reporter assay//qRT-PCR	Functional MTI	22673513
	hsa-miR-145-5p	Homo sapiens	ARL6IP5	Reporter assay;Microarray	Functional MTI	21351259
	hsa-miR-155-5p	Homo sapiens	ARMC2	Reporter assay;Other	Functional MTI	20584899
	hsa-miR-142-3p	Homo sapiens	ARNTL	Luciferase reporter assay//qRT-PCR	Functional MTI	21799909
	hsa-miR-155-5p	Homo sapiens	ARPC3	Reporter assay;Other	Non-Functional MTI	20584899
	hsa-miR-22-3p	Homo sapiens	ARPC5	Immunohistochemistry//Luciferase reporter assay//qRT-PCR//Western blot//EMSA//Microarray	Functional MTI	22447776
	hsa-miR-335-5p	Homo sapiens	ARPC5L	Luciferase reporter assay	Non-Functional MTI	20065103
	hsa-miR-182-5p	Homo sapiens	ARRDC3	Luciferase reporter assay	Functional MTI	27109471
	hsa-let-7i-5p	Homo sapiens	ASCL1	ChIP-seq//GFP reporter assay//Immunocytochemistry//Immunohistochemistry//Luciferase reporter assay//qRT-PCR	Functional MTI	23884650
	hsa-miR-182-5p	Homo sapiens	ATF1	Luciferase reporter assay	Functional MTI	23249749
	hsa-miR-424-5p	Homo sapiens	ATF6	Luciferase reporter assay	Functional MTI	19956200
	hsa-miR-200b-5p	Homo sapiens	ATG12	Luciferase reporter assay//qRT-PCR//Western blot	Functional MTI	26416454
	hsa-miR-106b-5p	Homo sapiens	ATG16L1	Immunofluorescence//Immunohistochemistry//In situ hybridization//Luciferase reporter assay//Western blot	Functional MTI	24036151
	hsa-miR-34a-5p	Homo sapiens	ATG4B	Luciferase reporter assay//qRT-PCR//Western blot	Functional MTI	26499184
	hsa-miR-29a-3p	Homo sapiens	ATG9A	Luciferase reporter assay//Western blot	Functional MTI	27626694
	hsa-miR-100-5p	Homo sapiens	ATM	Luciferase reporter assay//qRT-PCR//Western blot	Functional MTI	20869334
	hsa-miR-122-5p	Homo sapiens	ATP1A2	Luciferase reporter assay//qRT-PCR	Functional MTI	19296470
	hsa-miR-192-5p	Homo sapiens	ATP1B1	Luciferase reporter assay	Functional MTI	23221637
	hsa-miR-34a-5p	Homo sapiens	ATP5S	Luciferase reporter assay//qRT-PCR//Western blot	Functional MTI	26385595
	hsa-let-7i-5p	Homo sapiens	AURKB	Luciferase reporter assay//qRT-PCR//Western blot	Functional MTI	25997616
	hsa-miR-15b-5p	Homo sapiens	AXIN2	Luciferase reporter assay	Functional MTI	21501592
	hsa-miR-122-5p	Homo sapiens	AXL	Luciferase reporter assay	Functional MTI	24113455
	hsa-miR-15a-5p	Homo sapiens	BACE1	Luciferase reporter assay//Reporter assay;Other	Non-Functional MTI	18434550
	hsa-miR-155-5p	Homo sapiens	BACH1	Luciferase reporter assay//Microarray//qRT-PCR	Functional MTI	19193853
	hsa-miR-26a-5p	Homo sapiens	BAG4	Luciferase reporter assay//Microarray	Functional MTI	23190898
	hsa-miR-125a-5p	Homo sapiens	BAK1	Flow//Luciferase reporter assay//qRT-PCR//Western blot	Functional MTI	20616003
	hsa-miR-200a-3p	Homo sapiens	BAP1	Reporter assay	Functional MTI	20005803
	hsa-miR-182-5p	Homo sapiens	BARD1	Luciferase reporter assay	Functional MTI	23249749
	hsa-miR-191-5p	Homo sapiens	BASP1	qRT-PCR//Luciferase reporter assay//Immunoblot//Western blot	Functional MTI	25252218
	hsa-miR-34a-5p	Homo sapiens	BAX	Luciferase reporter assay//Western blot	Functional MTI	27610823
	hsa-miR-125b-5p	Homo sapiens	BBC3	Luciferase reporter assay//qRT-PCR//Western blot	Functional MTI	20886540
	hsa-miR-21-5p	Homo sapiens	BCL10	Luciferase reporter assay//Western blot	Functional MTI	25327529
	hsa-miR-125a-5p	Homo sapiens	BCL2	Luciferase reporter assay//qRT-PCR//Western blot	Functional MTI	26297542
	hsa-miR-133b	Homo sapiens	BCL2L1	ChIP-seq//Luciferase reporter assay//qRT-PCR//Western blot	Functional MTI	26276722
	hsa-miR-18a-5p	Homo sapiens	BCL2L10	Luciferase reporter assay	Functional MTI	24184144
	hsa-miR-106b-5p	Homo sapiens	BCL2L11	Flow//Luciferase reporter assay//qRT-PCR//Western blot	Functional MTI	23028803
	hsa-miR-125a-5p	Homo sapiens	BCL2L12	Luciferase reporter assay//qRT-PCR//Western blot	Functional MTI	26297542
	hsa-miR-122-5p	Homo sapiens	BCL2L2	Luciferase reporter assay//qRT-PCR//Western blot//Reporter assay;Western blot;Other	Functional MTI	18692484
	hsa-miR-125b-5p	Homo sapiens	BCL3	Luciferase reporter assay	Functional MTI	20658525
	hsa-miR-10a-5p	Homo sapiens	BCL6	Luciferase reporter assay//Western blot	Functional MTI	26590574
	hsa-miR-29a-3p	Homo sapiens	BCL7A	Luciferase reporter assay	Non-Functional MTI	20566844
	hsa-miR-146a-5p	Homo sapiens	BCLAF1	Luciferase reporter assay//qRT-PCR//Western blot	Functional MTI	27449900
	hsa-miR-10a-5p	Homo sapiens	BDNF	Luciferase reporter assay//qRT-PCR	Functional MTI	28112253
	hsa-miR-204-5p	Homo sapiens	BIRC2	Immunoblot//Luciferase reporter assay//Microarray//qRT-PCR//Western blot	Functional MTI	21282569
	hsa-miR-16-5p	Homo sapiens	BIRC5	Immunoblot//Luciferase reporter assay//qRT-PCR	Functional MTI	23380758
	hsa-miR-125b-5p	Homo sapiens	BMF	immunoblot//Luciferase reporter assay//qRT-PCR	Functional MTI	19471102
	hsa-miR-15a-5p	Homo sapiens	BMI1	Luciferase reporter assay//Western blot	Functional MTI	19903841
	hsa-let-7i-5p	Homo sapiens	BMP4	Luciferase reporter assay//qRT-PCR//Western blot	Functional MTI	23454123
	hsa-miR-22-3p	Homo sapiens	BMP6	Luciferase reporter assay	Functional MTI	24163368
	hsa-miR-137	Homo sapiens	BMP7	Luciferase reporter assay//Western blot	Functional MTI	26617798
	hsa-miR-125b-5p	Homo sapiens	BMPR1B	Luciferase reporter assay	Functional MTI	19738052
	hsa-miR-100-5p	Homo sapiens	BMPR2	Luciferase reporter assay//qRT-PCR//Western blot	Functional MTI	22684006
	hsa-miR-145-5p	Homo sapiens	BNIP3	Luciferase reporter assay//qRT-PCR//Western blot	Functional MTI	20332243
	hsa-miR-137	Homo sapiens	BNIP3L	Immunofluorescence//Immunohistochemistry//Luciferase reporter assay//qRT-PCR//Western blot	Functional MTI	24573672
	hsa-miR-142-3p	Homo sapiens	BOD1	Luciferase reporter assay//qRT-PCR//Western blot	Functional MTI	27527863
	hsa-miR-145-5p	Homo sapiens	BRAF	Luciferase reporter assay//qRT-PCR//Western blot	Functional MTI	23128394
	hsa-miR-146a-5p	Homo sapiens	BRCA1	Luciferase reporter assay	Functional MTI	18660546
	hsa-miR-146a-5p	Homo sapiens	BRCA2	Luciferase reporter assay	Functional MTI	18660546
	hsa-miR-22-3p	Homo sapiens	BSG	Luciferase reporter assay	Functional MTI	24906624
	hsa-miR-22-3p	Homo sapiens	BTG1	Luciferase reporter assay	Functional MTI	25449431
	hsa-miR-125b-5p	Homo sapiens	BTG2	Luciferase reporter assay//qRT-PCR//Western blot	Functional MTI	27613090
	hsa-miR-10a-5p	Homo sapiens	BTRC	Luciferase reporter assay//Microarray//qRT-PCR//Western blot	Functional MTI	20624982
	hsa-miR-145-5p	Homo sapiens	C11orf65	Reporter assay;Microarray	Functional MTI	21351259
	hsa-miR-155-5p	Homo sapiens	C16orf62	Reporter assay;Other	Functional MTI	20584899
	hsa-miR-155-5p	Homo sapiens	C17orf80	Reporter assay;Other	Non-Functional MTI	20584899
	hsa-miR-375	Homo sapiens	C1QBP	Reporter assay	Functional MTI	15806104
	hsa-miR-155-5p	Homo sapiens	C3orf18	Reporter assay;Other	Functional MTI	21036908
	hsa-miR-155-5p	Homo sapiens	CAB39	Reporter assay;Other	Non-Functional MTI	20584899
	hsa-miR-29a-3p	Homo sapiens	CACNA1C	Luciferase reporter assay//qRT-PCR//Western blot	Functional MTI	27341015
	hsa-miR-34a-5p	Homo sapiens	CACNB3	Immunocytochemistry//Luciferase reporter assay//Western blot	Functional MTI	25623948
	hsa-miR-15a-5p	Homo sapiens	CADM1	Reporter assay//qRT-PCR	Functional MTI	18362358
	hsa-miR-29a-3p	Homo sapiens	CALCR	Luciferase reporter assay	Functional MTI	24085298
	hsa-miR-137	Homo sapiens	CALN1	Luciferase reporter assay//qRT-PCR	Functional MTI	26163462
	hsa-miR-145-5p	Homo sapiens	CAMK1D	Immunoblot//Immunofluorescence//Luciferase reporter assay//Next Generation Sequencing (NGS)//qRT-PCR	Functional MTI	26586766
	hsa-miR-99a-5p	Homo sapiens	CAPNS1	Luciferase reporter assay//qRT-PCR//Western blot	Functional MTI	27994509
	hsa-miR-16-5p	Homo sapiens	CAPRIN1	Luciferase reporter assay//qRT-PCR//Western blot	Functional MTI	19250063
	hsa-miR-146a-5p	Homo sapiens	CARD10	In situ hybridization//Luciferase reporter assay//qRT-PCR//Western blot	Functional MTI	22992343
	hsa-miR-155-5p	Homo sapiens	CARD11	Reporter assay;Other	Functional MTI	20584899
	hsa-miR-155-5p	Homo sapiens	CARHSP1	Reporter assay;Other	Functional MTI	20584899
	hsa-miR-15a-5p	Homo sapiens	CARM1	Luciferase reporter assay//qRT-PCR//Western blot	Functional MTI	24530761
	hsa-miR-21-5p	Homo sapiens	CASC2	qRT-PCR//Luciferase reporter assay//Immunoprecipitaion//Western blot	Functional MTI	25446261
	hsa-miR-125a-5p	Homo sapiens	CASP2	Flow//Luciferase reporter assay//qRT-PCR//Western blot	Functional MTI	26962687
	hsa-let-7b-3p	Homo sapiens	CASP3	Immunohistochemistry//Luciferase reporter assay//qRT-PCR//Western blot	Functional MTI	26296645
	hsa-miR-106b-5p	Homo sapiens	CASP7	Luciferase reporter assay//qRT-PCR//Western blot	Functional MTI	22986525
	hsa-miR-106b-5p	Homo sapiens	CASP8	Luciferase reporter assay	Functional MTI	24166509
	hsa-miR-135b-5p	Homo sapiens	CASR	Luciferase reporter assay	Functional MTI	25320245
	hsa-miR-192-5p	Homo sapiens	CAV1	Luciferase reporter assay//qRT-PCR//Western blot	Functional MTI	24623846
	hsa-miR-125b-5p	Homo sapiens	CBFB	Luciferase reporter assay//qRT-PCR//Western blot	Functional MTI	21903586
	hsa-miR-155-5p	Homo sapiens	CBR4	Reporter assay;Other	Non-Functional MTI	20584899
	hsa-miR-21-5p	Homo sapiens	CBX4	Luciferase reporter assay//Western blot	Functional MTI	25327529
	hsa-miR-18a-3p	Homo sapiens	CBX7	Luciferase reporter assay//Western blot	Functional MTI	28123848
	hsa-miR-145-5p	Homo sapiens	CCDC43	Reporter assay;Microarray	Functional MTI	21351259
	hsa-miR-155-5p	Homo sapiens	CCDC82	Reporter assay;Other	Non-Functional MTI	20584899
	hsa-miR-101-5p	Homo sapiens	CCDC88A	Luciferase reporter assay//qRT-PCR//Western blot	Functional MTI	26743900
	hsa-miR-21-5p	Homo sapiens	CCL20	ELISA//Immunofluorescence//Luciferase reporter assay	Functional MTI	22001440
	hsa-miR-34a-5p	Homo sapiens	CCL22	Luciferase reporter assay	Functional MTI	22975373
	hsa-miR-146a-5p	Homo sapiens	CCL5	Luciferase reporter assay	Functional MTI	24996260
	hsa-let-7b-5p	Homo sapiens	CCNA1	Reporter assay	Non-Functional MTI	18379589
	hsa-let-7b-5p	Homo sapiens	CCNA2	Immunoblot//Immunofluorescence//Luciferase reporter assay//qRT-PCR	Functional MTI	18379589
	hsa-let-7b-5p	Homo sapiens	CCND1	Immunoblot//Immunofluorescence//Luciferase reporter assay//qRT-PCR//Reporter assay;Other	Functional MTI	18379589
	hsa-let-7b-5p	Homo sapiens	CCND2	Luciferase reporter assay	Functional MTI	17699775
	hsa-miR-15b-5p	Homo sapiens	CCND3	Luciferase reporter assay//Microarray//qRT-PCR//Western blot	Functional MTI	26144250
	hsa-miR-15a-5p	Homo sapiens	CCNE1	qRT-PCR//Luciferase reporter assay//Western blot	Functional MTI	19591824
	hsa-miR-200a-3p	Homo sapiens	CCNE2	Luciferase reporter assay	Functional MTI	22183793
	hsa-miR-424-5p	Homo sapiens	CCNF	Luciferase reporter assay	Functional MTI	19956200
	hsa-miR-122-5p	Homo sapiens	CCNG1	Reporter assay	Functional MTI	17616664
	hsa-miR-125b-5p	Homo sapiens	CCNJ	Luciferase reporter assay//Western blot	Functional MTI	24098452
	hsa-miR-142-3p	Homo sapiens	CCNT2	Luciferase reporter assay//Western blot	Functional MTI	22493297
	hsa-miR-21-5p	Homo sapiens	CCR1	Luciferase reporter assay	Non-Functional MTI	21131358
	hsa-miR-1207-5p	Homo sapiens	CD151	Luciferase reporter assay//qRT-PCR//Western blot	Functional MTI	26032086
	hsa-miR-892a	Homo sapiens	CD226	Luciferase reporter assay//qRT-PCR//Western blot	Functional MTI	27883251
	hsa-miR-34a-5p	Homo sapiens	CD24	Immunoblot//Immunoprecipitaion//Luciferase reporter assay//qRT-PCR	Functional MTI	23533633
	hsa-miR-152-5p	Homo sapiens	CD274	Flow//Immunofluorescence//Luciferase reporter assay//qRT-PCR	Functional MTI	28056089
	hsa-miR-29a-3p	Homo sapiens	CD276	Luciferase reporter assay//Western blot	Functional MTI	19584290
	hsa-miR-145-5p	Homo sapiens	CD28	Luciferase reporter assay	Functional MTI	24043548
	hsa-miR-125a-5p	Homo sapiens	CD34	Luciferase reporter assay//Microarray//Western blot//Reporter assay;Western blot	Functional MTI	18308931
	hsa-miR-145-5p	Homo sapiens	CD40	Luciferase reporter assay	Functional MTI	27731400
	hsa-miR-146a-5p	Homo sapiens	CD40LG	ELISA//Luciferase reporter assay//qRT-PCR//Western blot	Functional MTI	21236257
	hsa-miR-145-5p	Homo sapiens	CD44	Luciferase reporter assay//qRT-PCR//Western blot	Functional MTI	23128394
	hsa-miR-520e	Homo sapiens	CD46	ELISA//Luciferase reporter assay//qRT-PCR//Western blot//Reporter assay;Western blot;qRT-PCR;Other	Functional MTI	20574151
	hsa-miR-192-5p	Homo sapiens	CD47	Immunofluorescence//Luciferase reporter assay//Western blot	Functional MTI	26506238
	hsa-miR-146a-5p	Homo sapiens	CD80	Immunohistochemistry//Luciferase reporter assay//qRT-PCR//Western blot	Functional MTI	26505653
	hsa-miR-29a-3p	Homo sapiens	CD93	Luciferase reporter assay	Functional MTI	24085298
	hsa-miR-424-5p	Homo sapiens	CDC14A	Luciferase reporter assay	Functional MTI	19956200
	hsa-let-7b-5p	Homo sapiens	CDC25A	Luciferase reporter assay//Microarray//Western blot	Functional MTI	17699775
	hsa-let-7b-5p	Homo sapiens	CDC34	Luciferase reporter assay//Western blot	Functional MTI	19126550
	hsa-miR-155-5p	Homo sapiens	CDC40	Reporter assay;Other	Non-Functional MTI	20584899
	hsa-miR-133b	Homo sapiens	CDC42	Immunoblot//Luciferase reporter assay//Microarray	Functional MTI	22179829
	hsa-miR-26a-5p	Homo sapiens	CDC6	Luciferase reporter assay	Functional MTI	27158389
	hsa-miR-192-5p	Homo sapiens	CDC7	Luciferase reporter assay//qRT-PCR//Western blot//Reporter assay;Western blot;Microarray;Other	Functional MTI	19074876
	hsa-miR-204-5p	Homo sapiens	CDH1	Immunofluorescence//Luciferase reporter assay//qRT-PCR//Western blot	Functional MTI	24280681
	hsa-miR-145-5p	Homo sapiens	CDH2	Luciferase reporter assay//Western blot	Functional MTI	22370644
	hsa-miR-211-5p	Homo sapiens	CDH5	Luciferase reporter assay	Functional MTI	22235338
	hsa-miR-133b	Homo sapiens	CDK13	Luciferase reporter assay	Functional MTI	23451058
	hsa-miR-21-5p	Homo sapiens	CDK2AP1	Luciferase reporter assay//qRT-PCR//Western blot//Reporter assay	Functional MTI	21328460
	hsa-miR-214-5p	Homo sapiens	CDK3	Luciferase reporter assay//qRT-PCR//Western blot	Functional MTI	26498144
	hsa-miR-122-5p	Homo sapiens	CDK4	Reporter assay	Functional MTI	21750653
	hsa-let-7b-5p	Homo sapiens	CDK6	Luciferase reporter assay//Microarray//Western blot	Functional MTI	17699775
	hsa-miR-191-5p	Homo sapiens	CDK9	Flow//Luciferase reporter assay//Microarray//Next Generation Sequencing (NGS)//qRT-PCR//Western blot	Functional MTI	25992613
	hsa-miR-106b-5p	Homo sapiens	CDKN1A	Luciferase reporter assay//qRT-PCR	Functional MTI	18676839
	hsa-miR-148a-5p	Homo sapiens	CDKN1B	Luciferase reporter assay//Western blot	Functional MTI	27292025
	hsa-miR-10b-5p	Homo sapiens	CDKN2A	Luciferase reporter assay//Western blot	Functional MTI	21471404
	hsa-miR-15a-5p	Homo sapiens	CDKN2B	Luciferase reporter assay//qRT-PCR	Functional MTI	28214350
	hsa-miR-34a-5p	Homo sapiens	CDKN2C	Reporter assay;qRT-PCR	Functional MTI	21128241
	hsa-miR-125b-5p	Homo sapiens	CDKN2D	Luciferase reporter assay//qRT-PCR//Western blot	Functional MTI	27763644
	hsa-miR-16-5p	Homo sapiens	CDS2	Luciferase reporter assay//Western blot//Microarray//qRT-PCR	Functional MTI	23941513
	hsa-miR-204-5p	Homo sapiens	CDX2	Luciferase reporter assay	Non-Functional MTI	21225631
	hsa-miR-29a-3p	Homo sapiens	CEACAM6	Luciferase reporter assay//Western blot	Functional MTI	25171863
	hsa-miR-125b-5p	Homo sapiens	CEBPA	Luciferase reporter assay//qRT-PCR//Western blot	Functional MTI	25982911
	hsa-miR-155-5p	Homo sapiens	CEBPB	Luciferase reporter assay	Functional MTI	18367535
	hsa-miR-148a-5p	Homo sapiens	CENPF	Luciferase reporter assay//Western blot	Functional MTI	27292025
	hsa-miR-145-5p	Homo sapiens	CEP19	Reporter assay;Microarray	Functional MTI	21351259
	hsa-miR-155-5p	Homo sapiens	CEP41	Reporter assay;Other	Functional MTI	20584899
	hsa-miR-155-5p	Homo sapiens	CEP83	Reporter assay;Other	Functional MTI	20584899
	hsa-miR-210-5p	Homo sapiens	CFB	Luciferase reporter assay//Western blot	Functional MTI	28397307
	hsa-miR-145-5p	Homo sapiens	CFTR	Luciferase reporter assay//qRT-PCR	Functional MTI	23436935
	hsa-miR-26a-5p	Homo sapiens	CHD1	Luciferase reporter assay//Western blot	Functional MTI	24735615
	hsa-miR-155-5p	Homo sapiens	CHD9	Reporter assay;Other	Non-Functional MTI	20584899
	hsa-miR-15a-5p	Homo sapiens	CHEK1	Luciferase reporter assay//qRT-PCR//Western blot	Functional MTI	25594541
	hsa-miR-182-5p	Homo sapiens	CHEK2	Luciferase reporter assay	Functional MTI	23249749
	hsa-miR-10a-5p	Homo sapiens	CHL1	Luciferase reporter assay	Functional MTI	22634495
	hsa-miR-15a-5p	Homo sapiens	CHUK	Luciferase reporter assay//qRT-PCR//Western blot	Functional MTI	20711193
	hsa-miR-155-5p	Homo sapiens	CIAPIN1	Reporter assay;Other	Functional MTI	20584899
	hsa-miR-375	Homo sapiens	CIP2A	Luciferase reporter assay//QRTPCR//Western blot	Functional MTI	23552692
	hsa-miR-155-5p	Homo sapiens	CKAP5	Luciferase reporter assay//qRT-PCR//Western blot	Functional MTI	21799781
	hsa-miR-483-5p	Homo sapiens	CKB	Luciferase reporter assay//qRT-PCR//	Functional MTI	25601461
	hsa-miR-15a-5p	Homo sapiens	CLCN3	Luciferase reporter assay//Microarray//Northern blot//qRT-PCR//Western blot	Functional MTI	21880628
	hsa-miR-155-5p	Homo sapiens	CLDN1	Immunocytochemistry//Immunohistochemistry//In situ hybridization//Luciferase reporter assay//Microarray//qRT-PCR//Western blot	Functional MTI	24604078
	hsa-miR-125a-5p	Homo sapiens	CLEC5A	Luciferase reporter assay//qRT-PCR	Functional MTI	24216483
	hsa-miR-122-5p	Homo sapiens	CLIC4	Luciferase reporter assay//qRT-PCR	Functional MTI	23793894
	hsa-miR-145-5p	Homo sapiens	CLINT1	qRT-PCR//Luciferase reporter assay//Microarray//Reporter assay;Other	Functional MTI	19915607
	hsa-miR-182-5p	Homo sapiens	CLOCK	Luciferase reporter assay//qRT-PCR	Functional MTI	20656788
	hsa-miR-21-5p	Homo sapiens	CLU	Luciferase reporter assay	Functional MTI	24327270
	hsa-miR-155-5p	Homo sapiens	CLUAP1	Reporter assay;Other	Functional MTI	20584899
	hsa-miR-146a-5p	Homo sapiens	CNOT6L	Luciferase reporter assay	Functional MTI	23591815
	hsa-miR-29a-3p	Homo sapiens	COL10A1	Luciferase reporter assay	Functional MTI	22745231
	hsa-miR-29a-3p	Homo sapiens	COL1A2	Luciferase reporter assay//Western blot	Functional MTI	26794609
	hsa-let-7b-5p	Homo sapiens	COL3A1	Luciferase reporter assay//Microarray//qRT-PCR	Functional MTI	22995917
	hsa-miR-21-5p	Homo sapiens	COL4A1	Luciferase reporter assay//qRT-PCR	Functional MTI	22573493
	hsa-miR-29a-3p	Homo sapiens	COL4A2	Luciferase reporter assay//qRT-PCR//Western blot	Functional MTI	20067797
	hsa-miR-29a-3p	Homo sapiens	COL5A2	Luciferase reporter assay	Functional MTI	22745231
	hsa-miR-146a-5p	Homo sapiens	COPS8	In situ hybridization//Luciferase reporter assay//qRT-PCR//Western blot	Functional MTI	22992343
	hsa-miR-137	Homo sapiens	COX2	FACS//Immunohistochemistry//Luciferase reporter assay//qRT-PCR//Western blot	Functional MTI	25064845
	hsa-let-7b-5p	Homo sapiens	CPEB1	Luciferase reporter assay//Microarray//qRT-PCR	Functional MTI	22995917
	hsa-miR-26a-5p	Homo sapiens	CPEB2	Luciferase reporter assay//Northern blot//qRT-PCR	Functional MTI	20660482
	hsa-let-7b-5p	Homo sapiens	CPEB3	Luciferase reporter assay//Microarray//qRT-PCR	Functional MTI	22995917
	hsa-let-7b-5p	Homo sapiens	CPEB4	Luciferase reporter assay//Microarray//qRT-PCR	Non-Functional MTI	22995917
	hsa-miR-146a-5p	Homo sapiens	CPM	Luciferase reporter assay//Western blot	Functional MTI	28186967
	hsa-miR-133b	Homo sapiens	CPNE3	Luciferase reporter assay	Functional MTI	23451058
	hsa-miR-10b-5p	Homo sapiens	CREB1	Luciferase reporter assay	Functional MTI	26796749
	hsa-miR-182-5p	Homo sapiens	CREB5	Luciferase reporter assay	Functional MTI	23249749
	hsa-miR-15b-5p	Homo sapiens	CRIM1	Luciferase reporter assay//qRT-PCR//Western blot	Non-Functional MTI	24435757
	hsa-miR-126-5p	Homo sapiens	CRK	2-D Gel Electrophoresis (2DGE)//ELISA//Luciferase reporter assay//qRT-PCR//Western blot	Functional MTI	24480980
	hsa-miR-15a-5p	Homo sapiens	CRKL	Luciferase reporter assay//Microarray//Northern blot//qRT-PCR//Western blot	Functional MTI	21880628
	hsa-miR-145-5p	Homo sapiens	CRNDE	Luciferase reporter assay//qRT-PCR//Western blot	Functional MTI	28490034
	hsa-miR-34a-5p	Homo sapiens	Crtc1	ELISA//Immunoprecipitaion//Luciferase reporter assay//Microarray//Next Generation Sequencing (NGS)//qRT-PCR//Western blot	Functional MTI	27869139
	hsa-miR-137	Homo sapiens	CSE1L	Luciferase reporter assay//Western blot	Functional MTI	23252729
	hsa-miR-1207-5p	Homo sapiens	CSF1	Luciferase reporter assay	Functional MTI	27107415
	hsa-miR-155-5p	Homo sapiens	CSF1R	ELISA//Luciferase reporter assay//qRT-PCR//Western blot	Functional MTI	21355095
	hsa-miR-10b-5p	Homo sapiens	CSMD1	Immunocytochemistry//Immunohistochemistry//Luciferase reporter assay//qRT-PCR	Functional MTI	27756250
	hsa-miR-155-5p	Homo sapiens	CSNK1A1	Luciferase reporter assay	Functional MTI	22350414
	hsa-miR-125b-5p	Homo sapiens	CSNK2A1	Luciferase reporter assay//Western blot	Functional MTI	24098452
	hsa-miR-137	Homo sapiens	CTBP1	Luciferase reporter assay//qRT-PCR//Western blot//Reporter assay;Other	Functional MTI	21278922
	hsa-miR-122-5p	Homo sapiens	CTDNEP1	Luciferase reporter assay//qRT-PCR//Western blot	Functional MTI	28287811
	hsa-miR-191-5p	Homo sapiens	CTDSP2	Immunoprecipitation//In situ hybridization//Luciferase assay//Microarray//Northern blot//QRTPCR//Western blot	Functional MTI	23505378
	hsa-miR-100-5p	Homo sapiens	CTDSPL	Luciferase reporter assay//Northern blot//qRT-PCR//Western blot	Functional MTI	21643017
	hsa-miR-133b	Homo sapiens	CTGF	Luciferase reporter assay	Functional MTI	24065814
	hsa-let-7b-5p	Homo sapiens	CTHRC1	Luciferase reporter assay//qRT-PCR//Western blot	Functional MTI	25510669
	hsa-miR-200a-5p	Homo sapiens	CTNNB1	Luciferase reporter assay//Western blot	Functional MTI	28164117
	hsa-miR-145-5p	Homo sapiens	CTNND1	Immunohistochemistry//Luciferase reporter assay//qRT-PCR//Western blot	Functional MTI	25470111
	hsa-miR-424-5p	Homo sapiens	CUL2	ChIP-seq//Luciferase reporter assay//Microarray//qRT-PCR//Western blot	Functional MTI	20972335
	hsa-miR-137	Homo sapiens	CUL4A	Luciferase reporter assay//Immunofluorescence//Immunohistochemistry//Immunoprecipitaion//qRT-PCR//Western blot	Functional MTI	26840256
	hsa-miR-192-5p	Homo sapiens	CUL5	Luciferase reporter assay//qRT-PCR//Western blot//Reporter assay;Western blot;Microarray;Other	Functional MTI	19074876
	hsa-miR-15a-5p	Homo sapiens	CXCL10	Luciferase reporter assay	Functional MTI	26845678
	hsa-miR-126-5p	Homo sapiens	CXCL12	Luciferase reporter assay	Functional MTI	23396050
	hsa-miR-93-5p	Homo sapiens	CXCL8	Luciferase reporter assay//qRT-PCR	Functional MTI	24433094
	hsa-miR-22-3p	Homo sapiens	CXCR2	Flow//Gluc reporter assay//GUS reporter assay//HITS-CLIP//Immunoblot//Immunocytochemistry//Immunofluorescence//Immunohistochemistry//Immunoprecipitaion//Luciferase reporter assay//qRT-PCR//Western blot//RNA immunoprecipitation assay (RIP)//	Functional MTI	26364720
	hsa-miR-133b	Homo sapiens	CXCR4	Luciferase reporter assay//qRT-PCR//Western blot	Functional MTI	24330809
	hsa-miR-106b-5p	Homo sapiens	CYBB	ELISA//Immunohistochemistry//Luciferase reporter assay//qRT-PCR//Western blot	Functional MTI	28235791
	hsa-miR-126-5p	Homo sapiens	CYLD	ELISA//Luciferase reporter assay//qRT-PCR//Western blot	Functional MTI	28250134
	hsa-miR-515-5p	Homo sapiens	CYP19A1	ChIP-seq//Luciferase reporter assay	Functional MTI	27791094
	hsa-miR-187-5p	Homo sapiens	CYP1B1	Luciferase reporter assay//qRT-PCR//Western blot	Functional MTI	27495872
	hsa-miR-125b-5p	Homo sapiens	CYP24A1	qRT-PCR//Luciferase reporter assay//Western blot//Northern blot//Reporter assay	Functional MTI	19570947
	hsa-miR-29a-3p	Homo sapiens	CYP2C19	EMSA//Luciferase reporter assay//qRT-PCR//Western blot	Functional MTI	26296572
	hsa-let-7b-5p	Homo sapiens	CYP2J2	Luciferase reporter assay//qRT-PCR//Western blot	Functional MTI	22761738
	hsa-miR-155-5p	Homo sapiens	CYP2U1	Reporter assay;Other	Functional MTI	20584899
	hsa-miR-122-5p	Homo sapiens	CYP7A1	qRT-PCR//Luciferase reporter assay	Functional MTI	20351063
	hsa-miR-100-5p	Homo sapiens	CYR61	ELISA//Luciferase reporter assay//qRT-PCR//Western blot	Functional MTI	24317814
	hsa-miR-335-5p	Homo sapiens	DAAM2	Luciferase reporter assay//QRTPCR//Western blot	Functional MTI	24223803
	hsa-miR-106b-5p	Homo sapiens	DAB2	Immunohistochemistry//Luciferase reporter assay//qRT-PCR//Western blot	Functional MTI	26769181
	hsa-miR-21-5p	Homo sapiens	DAXX	Luciferase reporter assay//qRT-PCR//Western blot	Functional MTI	18829576
	hsa-miR-451a	Homo sapiens	DCBLD2	Luciferase reporter assay//qRT-PCR//Western blot	Functional MTI	24918822
	hsa-miR-137	Homo sapiens	DCLK1	Luciferase reporter assay//Western blot	Functional MTI	26747706
	hsa-miR-155-5p	Homo sapiens	DCUN1D2	Reporter assay;Other	Functional MTI	20584899
	hsa-miR-21-5p	Homo sapiens	DDAH1	Luciferase reporter assay//qRT-PCR//Western blot	Functional MTI	26455824
	hsa-miR-211-5p	Homo sapiens	DDIT3	Luciferase reporter assay//Microarray//qRT-PCR//Western blot	Functional MTI	24039954
	hsa-miR-145-5p	Homo sapiens	DDX17	Luciferase reporter assay//Northern blot//qRT-PCR//Western blot	Functional MTI	22876303
	hsa-miR-205-5p	Homo sapiens	DDX5	Luciferase reporter assay	Non-Functional MTI	20065103
	hsa-miR-10b-5p	Homo sapiens	DDX58	Luciferase reporter assay	Functional MTI	25312779
	hsa-miR-145-5p	Homo sapiens	DDX6	Immunofluorescence//Luciferase reporter assay//qRT-PCR//Western blot	Functional MTI	23932921
	hsa-miR-200a-3p	Homo sapiens	DEK	Immunohistochemistry//Luciferase reporter assay//qRT-PCR//Western blot	Functional MTI	26947878
	hsa-miR-375	Homo sapiens	DEPTOR	Luciferase reporter assay//qRT-PCR//Western blot	Functional MTI	28262546
	hsa-miR-21-5p	Homo sapiens	DERL1	Luciferase reporter assay//Quantitative proteomic approach	Functional MTI	19253296
	hsa-miR-155-5p	Homo sapiens	DET1	Luciferase reporter assay	Functional MTI	18367535
	hsa-miR-145-5p	Homo sapiens	DFFA	Luciferase reporter assay//qRT-PCR//Western blot	Functional MTI	20687965
	hsa-miR-125b-5p	Homo sapiens	DGAT1	Luciferase reporter assay	Functional MTI	19635812
	hsa-miR-34a-5p	Homo sapiens	DGUOK	Luciferase reporter assay	Functional MTI	24147106
	hsa-miR-192-5p	Homo sapiens	DHFR	Luciferase reporter assay//Western blot	Functional MTI	26506238
	hsa-miR-155-5p	Homo sapiens	DHX40	Reporter assay;Other	Functional MTI	20584899
	hsa-miR-18a-5p	Homo sapiens	DICER1	Immunohistochemistry//In situ hybridization//Luciferase reporter assay//Microarray//qRT-PCR//Western blot	Functional MTI	23097559
	hsa-miR-29a-3p	Homo sapiens	DKK1	Luciferase reporter assay//qRT-PCR//Western blot	Functional MTI	20551325
	hsa-miR-125b-5p	Homo sapiens	DKK3	ChIP-seq//Luciferase reporter assay//qRT-PCR//Western blot	Functional MTI	27788486
	hsa-miR-429	Homo sapiens	DLC1	Luciferase reporter assay//qRT-PCR//Western blot	Functional MTI	27602157
	hsa-miR-192-5p	Homo sapiens	DLG5	Luciferase reporter assay//qRT-PCR//Reporter assay;Microarray;Other	Functional MTI	19074876
	hsa-miR-34a-5p	Homo sapiens	DLL1	Luciferase reporter assay	Functional MTI	14697198
	hsa-miR-125a-5p	Homo sapiens	DLL4	Flow//Immunofluorescence//Luciferase reporter assay//Western blot	Functional MTI	27252357
	hsa-miR-200a-3p	Homo sapiens	DLX5	Luciferase reporter assay	Functional MTI	19454767
	hsa-miR-15a-5p	Homo sapiens	DMTF1	Luciferase reporter assay//Reporter assay	Functional MTI	15131085
	hsa-miR-21-5p	Homo sapiens	DNM1L	Luciferase reporter assay//qRT-PCR//Western blot	Functional MTI	28347692
	hsa-miR-140-5p	Homo sapiens	DNMT1	Immunohistochemistry//Luciferase reporter assay//Microarray//qRT-PCR//Western blot	Functional MTI	22898998
	hsa-miR-29a-3p	Homo sapiens	DNMT3A	Luciferase reporter assay//Western blot//qRT-PCR//Reporter assay;Other	Functional MTI	17890317
	hsa-miR-26a-5p	Homo sapiens	DNMT3B	Luciferase reporter assay//Microarray//qRT-PCR//Western blot	Functional MTI	24343426
	hsa-miR-140-5p	Homo sapiens	DNPEP	Luciferase reporter assay	Functional MTI	21576357
	hsa-miR-155-5p	Homo sapiens	DOCK1	Immunocytochemistry//Immunohistochemistry//In situ hybridization//Luciferase reporter assay//Microarray//qRT-PCR//Western blot	Functional MTI	24604078
	hsa-miR-21-5p	Homo sapiens	DOCK4	Immunoblot//Luciferase reporter assay//qRT-PCR	Functional MTI	22158624
	hsa-miR-21-5p	Homo sapiens	DOCK5	Immunoblot//Luciferase reporter assay//qRT-PCR	Functional MTI	22158624
	hsa-miR-142-3p	Homo sapiens	DOCK6	Immunoblot//qRT-PCR//Luciferase reporter assay//Western blot	Functional MTI	25832008
	hsa-miR-21-5p	Homo sapiens	DOCK7	Immunoblot//Luciferase reporter assay//qRT-PCR	Functional MTI	22158624
	hsa-miR-125b-5p	Homo sapiens	DRAM2	Luciferase reporter assay//qRT-PCR//Western blot	Functional MTI	27518550
	hsa-miR-122-5p	Homo sapiens	DSTYK	Luciferase reporter assay//qRT-PCR	Functional MTI	19296470
	hsa-miR-145-5p	Homo sapiens	DTD1	Reporter assay;Microarray	Functional MTI	21351259
	hsa-miR-192-5p	Homo sapiens	DTL	Luciferase reporter assay//qRT-PCR//Reporter assay;Microarray;Other	Functional MTI	19074876
	hsa-miR-21-5p	Homo sapiens	DUSP10	Luciferase reporter assay//qRT-PCR//Western blot	Functional MTI	22387553
	hsa-miR-122-5p	Homo sapiens	DUSP2	Luciferase reporter assay//qRT-PCR	Functional MTI	19296470
	hsa-miR-26a-5p	Homo sapiens	DUSP4	Luciferase reporter assay//qRT-PCR//Western blot	Functional MTI	25877859
	hsa-miR-26a-5p	Homo sapiens	DUSP5	Luciferase reporter assay//qRT-PCR//Western blot	Functional MTI	25877859
	hsa-miR-125b-5p	Homo sapiens	DUSP6	Luciferase reporter assay//Western blot//qRT-PCR	Functional MTI	25001178
	hsa-miR-204-5p	Homo sapiens	DVL3	Luciferase reporter assay//qRT-PCR//Western blot	Functional MTI	25847080
	hsa-miR-106b-5p	Homo sapiens	E2F1	Luciferase reporter assay//qRT-PCR	Functional MTI	18676839
	hsa-let-7b-5p	Homo sapiens	E2F2	Immunofluorescence//Luciferase reporter assay//qRT-PCR//Western blot	Functional MTI	27520092
	hsa-miR-106b-5p	Homo sapiens	E2F3	Luciferase reporter assay	Non-Functional MTI	21283765
	hsa-miR-205-5p	Homo sapiens	E2F5	Reporter assay	Functional MTI	21454583
	hsa-miR-137	Homo sapiens	E2F6	Luciferase reporter assay//qRT-PCR//Western blot	Non-Functional MTI	18381414
	hsa-miR-204-5p	Homo sapiens	EDEM1	Luciferase reporter assay//Microarray//qRT-PCR	Functional MTI	21282569
	hsa-miR-125a-5p	Homo sapiens	EDN1	Luciferase reporter assay	Functional MTI	27106952
	hsa-miR-204-5p	Homo sapiens	EFNB2	Luciferase reporter assay//qRT-PCR//Western blot	Functional MTI	23204229
	hsa-miR-223-5p	Homo sapiens	EGF	Luciferase reporter assay//Microarray//qRT-PCR//Western blot	Functional MTI	26876200
	hsa-miR-122-5p	Homo sapiens	EGFR	Luciferase reporter assay//qRT-PCR//Western blot	Functional MTI	28641303
	hsa-miR-21-5p	Homo sapiens	EGLN1	Luciferase reporter assay	Functional MTI	27030384
	hsa-miR-205-5p	Homo sapiens	EGLN2	Luciferase reporter assay//Microarray//qRT-PCR//Western blot	Functional MTI	22859986
	hsa-miR-122-5p	Homo sapiens	EGLN3	Luciferase reporter assay//qRT-PCR	Functional MTI	19296470
	hsa-miR-183-5p	Homo sapiens	EGR1	Luciferase reporter assay	Functional MTI	21118966
	hsa-miR-15b-5p	Homo sapiens	EIF4A1	Luciferase reporter assay	Functional MTI	16609010
	hsa-miR-21-5p	Homo sapiens	EIF4A2	Immunoblot//Immunohistochemistry//Luciferase reporter assay//Microarray//qRT-PCR//Western blot	Functional MTI	21219636
	hsa-miR-145-5p	Homo sapiens	EIF4E	Luciferase reporter assay//qRT-PCR//Western blot	Functional MTI	21092188
	hsa-miR-125a-5p	Homo sapiens	EIF4EBP1	Luciferase reporter assay//qRT-PCR//Western blot	Functional MTI	26646586
	hsa-miR-125b-5p	Homo sapiens	EIF5A2	Luciferase reporter assay//qRT-PCR//Western blot	Functional MTI	24811246
	hsa-miR-125a-5p	Homo sapiens	ELAVL1	Luciferase reporter assay//Western blot	Functional MTI	19875930
	hsa-miR-375	Homo sapiens	ELAVL4	GFP reporter assay//Immunohistochemistry//Microarray//qRT-PCR//Western blot//Reporter assay;Western blot;qRT-PCR;Microarray;Other	Functional MTI	20584986
	hsa-miR-200a-3p	Homo sapiens	ELMO2	Reporter assay	Functional MTI	20005803
	hsa-miR-125b-5p	Homo sapiens	ENPEP	Luciferase reporter assay//Western blot	Functional MTI	24098452
	hsa-miR-122-5p	Homo sapiens	ENTPD4	Luciferase reporter assay//qRT-PCR	Functional MTI	19296470
	hsa-miR-106b-5p	Homo sapiens	EOMES	Luciferase reporter assay	Functional MTI	20709030
	hsa-miR-145-5p	Homo sapiens	EPAS1	Luciferase reporter assay//qRT-PCR//Western blot	Functional MTI	23222716
	hsa-miR-10a-5p	Homo sapiens	EPHA4	GFP reporter assay//Immunohistochemistry//qRT-PCR//Western blot	Functional MTI	22996586
	hsa-miR-34a-5p	Homo sapiens	EPHA5	Luciferase reporter assay//Western blot	Functional MTI	22079638
	hsa-miR-335-5p	Homo sapiens	EPN2	Reporter assay;Western blot	Functional MTI	21618216
	hsa-miR-125b-5p	Homo sapiens	EPO	Luciferase reporter assay	Functional MTI	24165569
	hsa-miR-125b-5p	Homo sapiens	EPOR	Luciferase reporter assay	Functional MTI	24165569
	hsa-miR-125a-5p	Homo sapiens	ERBB2	Luciferase reporter assay//Northern blot//qRT-PCR//Western blot	Functional MTI	17110380
	hsa-miR-125a-5p	Homo sapiens	ERBB3	Luciferase reporter assay//Northern blot//qRT-PCR//Western blot	Functional MTI	17110380
	hsa-miR-146a-5p	Homo sapiens	ERBB4	Luciferase reporter assay//Microarray//Western blot	Functional MTI	20864407
	hsa-miR-200a-3p	Homo sapiens	ERBIN	Reporter assay	Functional MTI	20005803
	hsa-miR-192-5p	Homo sapiens	ERCC3	Luciferase reporter assay//qRT-PCR//Reporter assay;Microarray;Other	Functional MTI	19074876
	hsa-miR-192-5p	Homo sapiens	ERCC4	Luciferase reporter assay//qRT-PCR//Western blot	Functional MTI	21672525
	hsa-miR-133b	Homo sapiens	ERG	Reporter assay	Functional MTI	17344217
	hsa-miR-145-5p	Homo sapiens	ESR1	Luciferase reporter assay	Functional MTI	19730444
	hsa-miR-125a-5p	Homo sapiens	ESRRA	Luciferase reporter assay//Western blot	Functional MTI	25266720
	hsa-miR-205-5p	Homo sapiens	ESRRG	Luciferase reporter assay	Functional MTI	23589079
	hsa-miR-125b-5p	Homo sapiens	ETS1	Immunoblot//Luciferase reporter assay	Functional MTI	21444677
	hsa-miR-155-5p	Homo sapiens	EXOSC2	Reporter assay;Other	Functional MTI	20584899
	hsa-miR-137	Homo sapiens	EZH2	LC-MS/MS//Luciferase reporter assay//qRT-PCR//Western blot	Functional MTI	25505154
	hsa-miR-183-5p	Homo sapiens	EZR	Luciferase reporter assay	Functional MTI	18840437
	hsa-miR-145-5p	Homo sapiens	F11R	Reporter assay	Functional MTI	20818426
	hsa-miR-146a-5p	Homo sapiens	FADD	Luciferase reporter assay	Functional MTI	19965651
	hsa-miR-146a-5p	Homo sapiens	FAF1	GFP reporter assay//qRT-PCR	Functional MTI	20459811
	hsa-miR-133b	Homo sapiens	FAIM	Luciferase reporter assay//Microarray//qRT-PCR//Western blot	Functional MTI	22532850
	hsa-miR-122-5p	Homo sapiens	FAM117B	Luciferase reporter assay//qRT-PCR	Functional MTI	19296470
	hsa-miR-106b-5p	Homo sapiens	FAM129A	Luciferase reporter assay//qRT-PCR//Western blot	Functional MTI	26317551
	hsa-miR-155-5p	Homo sapiens	FAM135A	Reporter assay;Other	Functional MTI	18950466
	hsa-miR-483-5p	Homo sapiens	FAM160B2	Immunoblot//Immunohistochemistry//Luciferase reporter assay//qRT-PCR	Functional MTI	22971576
	hsa-miR-155-5p	Homo sapiens	FAM177A1	Reporter assay;Other	Functional MTI	20584899
	hsa-miR-155-5p	Homo sapiens	FAM199X	Reporter assay;Other	Functional MTI	20584899
	hsa-miR-423-5p	Homo sapiens	FAM3A	Luciferase reporter assay//qRT-PCR//Western blot	Functional MTI	28411267
	hsa-miR-145-5p	Homo sapiens	FAM3C	Reporter assay;Microarray	Functional MTI	21351259
	hsa-miR-145-5p	Homo sapiens	FAM45A	Reporter assay;Microarray	Functional MTI	21351259
	hsa-miR-155-5p	Homo sapiens	FAM91A1	Reporter assay;Other	Functional MTI	20584899
	hsa-miR-146a-5p	Homo sapiens	FANCM	Immunofluorescence//Luciferase reporter assay//qRT-PCR//Western blot	Functional MTI	27351285
	hsa-miR-125b-5p	Homo sapiens	Fas	ChIP-seq//Luciferase reporter assay//Microarray//qRT-PCR//Western blot	Functional MTI	26272872
	hsa-miR-149-5p	Homo sapiens	FASLG	Luciferase reporter assay//qRT-PCR//Western blot	Functional MTI	28013316
	hsa-miR-29a-3p	Homo sapiens	FBN1	Luciferase reporter assay	Functional MTI	22745231
	hsa-miR-21-5p	Homo sapiens	FBXO11	Luciferase reporter assay	Functional MTI	25589783
	hsa-miR-223-5p	Homo sapiens	FBXO8	Luciferase reporter assay//Microarray//Western blot	Functional MTI	27916606
	hsa-miR-155-5p	Homo sapiens	FBXW7	Luciferase reporter assay//qRT-PCR	Functional MTI	27904771
	hsa-miR-125b-5p	Homo sapiens	FES	Luciferase reporter assay//Western blot	Functional MTI	28389358
	hsa-miR-29a-3p	Homo sapiens	FGA	Luciferase reporter assay	Functional MTI	20570858
	hsa-miR-29a-3p	Homo sapiens	FGB	Luciferase reporter assay	Functional MTI	20570858
	hsa-miR-152-5p	Homo sapiens	FGF2	Luciferase reporter assay//qRT-PCR//Western blot	Functional MTI	28258379
	hsa-miR-155-5p	Homo sapiens	FGF7	Luciferase reporter assay	Functional MTI	19701459
	hsa-miR-140-5p	Homo sapiens	FGF9	Luciferase reporter assay	Functional MTI	23401231
	hsa-miR-133b	Homo sapiens	FGFR1	Luciferase reporter assay//Western blot//Immunohistochemistry//qRT-PCR	Functional MTI	23296701
	hsa-miR-125b-5p	Homo sapiens	FGFR2	Immunohistochemistry//Luciferase reporter assay//qRT-PCR//Western blot	Functional MTI	21412257
	hsa-miR-100-5p	Homo sapiens	FGFR3	Luciferase reporter assay//qRT-PCR//Western blot	Functional MTI	19843843
	hsa-miR-140-5p	Homo sapiens	FGFRL1	Luciferase reporter assay	Functional MTI	25941324
	hsa-miR-29a-3p	Homo sapiens	FGG	ELISA//Flow//Luciferase reporter assay	Functional MTI	20570858
	hsa-miR-34a-5p	Homo sapiens	FKBP1B	Luciferase reporter assay	Functional MTI	26471303
	hsa-miR-100-5p	Homo sapiens	FKBP5	FACS//Luciferase reporter assay//qRT-PCR//Western blot	Functional MTI	24030073
	hsa-miR-145-5p	Homo sapiens	FLI1	qRT-PCR//Luciferase reporter assay//Western blot	Functional MTI	20382729
	hsa-miR-182-5p	Homo sapiens	FLOT1	Immunohistochemistry//qRT-PCR//Western blot//luciferase reporter assays	Functional MTI	24886554
	hsa-miR-34a-5p	Homo sapiens	FLOT2	Luciferase reporter assay//qRT-PCR//Western blot	Functional MTI	25403318
	hsa-miR-100-5p	Homo sapiens	FLT1	Luciferase reporter assay	Functional MTI	22955733
	hsa-miR-335-5p	Homo sapiens	FMN2	Luciferase assay//qRT-PCR//Western blot	Functional MTI	24223803
	hsa-miR-137	Homo sapiens	FMNL2	Luciferase reporter assay	Functional MTI	23201162
	hsa-miR-335-5p	Homo sapiens	FMNL3	Luciferase assay//qRT-PCR//Western blot	Functional MTI	24223803
	hsa-miR-101-5p	Homo sapiens	FOS	Luciferase reporter assay//qRT-PCR//Western blot	Functional MTI	27485165
	hsa-miR-34a-5p	Homo sapiens	FOSL1	Immunoprecipitaion//Luciferase reporter assay//qRT-PCR//Western blot	Functional MTI	22198213
	hsa-miR-93-5p	Homo sapiens	FOXA1	Luciferase reporter assay//qRT-PCR//Western blot	Functional MTI	27829043
	hsa-miR-200a-3p	Homo sapiens	FOXA2	Luciferase reporter assay//qRT-PCR//Western blot	Functional MTI	28367241
	hsa-miR-133b	Homo sapiens	FOXC1	qRT-PCR//Western blot//EGFR reporter assay////Luciferase reporter assay	Functional MTI	27050992
	hsa-miR-182-5p	Homo sapiens	FOXF2	Luciferase reporter assay	Functional MTI	23383207
	hsa-miR-122-5p	Homo sapiens	FOXJ3	Luciferase reporter assay//qRT-PCR	Functional MTI	19296470
	hsa-miR-133b	Homo sapiens	FOXL2	ChIP-seq//Luciferase reporter assay//qRT-PCR//Western blot	Functional MTI	23810756
	hsa-miR-134-5p	Homo sapiens	FOXM1	Luciferase reporter assay//Western blot	Functional MTI	23010597
	hsa-miR-15a-5p	Homo sapiens	FOXO1	Luciferase reporter assay//qRT-PCR//Western blot	Functional MTI	24862853
	hsa-miR-155-5p	Homo sapiens	FOXO3	qRT-PCR//Luciferase reporter assay//Western blot	Functional MTI	20371610
	hsa-miR-122-5p	Homo sapiens	FOXP1	Luciferase reporter assay//qRT-PCR	Functional MTI	19296470
	hsa-miR-133a-5p	Homo sapiens	FSCN1	Luciferase reporter assay//qRT-PCR//Western blot	Functional MTI	25815687
	hsa-miR-137	Homo sapiens	FUNDC1	Immunofluorescence//Immunohistochemistry//Luciferase reporter assay//qRT-PCR//Western blot	Functional MTI	24573672
	hsa-miR-122-5p	Homo sapiens	FUNDC2	Luciferase reporter assay//qRT-PCR	Functional MTI	19296470
	hsa-miR-122-3p	Homo sapiens	FUT1	ELISA//Luciferase reporter assay//qRT-PCR//Western blot	Functional MTI	26636761
	hsa-miR-15b-5p	Homo sapiens	FUT2	Luciferase reporter assay//qRT-PCR//Western blot	Functional MTI	24122375
	hsa-miR-122-5p	Homo sapiens	FUT8	Luciferase reporter assay//qRT-PCR//Western blot	Functional MTI	24130780
	hsa-miR-145-5p	Homo sapiens	FXN	Luciferase reporter assay	Functional MTI	26717909
	hsa-miR-106b-5p	Homo sapiens	FYN	Luciferase reporter assay//Western blot	Functional MTI	27520374
	hsa-miR-204-5p	Homo sapiens	FZD1	Luciferase reporter assay//Microarray//qRT-PCR	Functional MTI	21282569
	hsa-miR-515-5p	Homo sapiens	FZD5	ChIP-seq//Luciferase reporter assay	Functional MTI	27791094
	hsa-miR-125b-5p	Homo sapiens	FZD6	Luciferase reporter assay	Functional MTI	27698350
	hsa-miR-145-5p	Homo sapiens	FZD7	Luciferase reporter assay	Non-Functional MTI	20737575
	hsa-miR-375	Homo sapiens	FZD8	Luciferase reporter assay	Functional MTI	23393589
	hsa-miR-122-5p	Homo sapiens	G6PC3	Luciferase reporter assay//qRT-PCR	Functional MTI	19296470
	hsa-miR-125b-5p	Homo sapiens	GAB2	Luciferase reporter assay//qRT-PCR//Western blot	Functional MTI	26354435
	hsa-miR-155-5p	Homo sapiens	GABARAPL1	Reporter assay;Other	Non-Functional MTI	20584899
	hsa-miR-140-5p	Homo sapiens	GALC	Luciferase reporter assay//Microarray	Functional MTI	26175215
	hsa-miR-122-5p	Homo sapiens	GALNT10	Luciferase reporter assay//qRT-PCR	Functional MTI	19296470
	hsa-miR-125a-5p	Homo sapiens	GALNT14	Luciferase reporter assay//qRT-PCR//Western blot	Functional MTI	27133078
	hsa-miR-140-5p	Homo sapiens	GALNT16	Luciferase reporter assay//Microarray	Functional MTI	26175215
	hsa-miR-34a-5p	Homo sapiens	GALNT7	Luciferase reporter assay//qRT-PCR//Western blot	Functional MTI	24482044
	hsa-miR-148a-5p	Homo sapiens	GAS1	Luciferase reporter assay//qRT-PCR//Western blot	Functional MTI	26609469
	hsa-miR-155-5p	Homo sapiens	GATM	Reporter assay;Other	Functional MTI	20584899
	hsa-miR-155-5p	Homo sapiens	GCFC2	Reporter assay;Other	Non-Functional MTI	20584899
	hsa-miR-515-5p	Homo sapiens	GCM1	ChIP-seq//Luciferase reporter assay	Functional MTI	27791094
	hsa-miR-155-5p	Homo sapiens	GCSAM	Luciferase reporter assay//Western blot	Functional MTI	22096245
	hsa-miR-200a-3p	Homo sapiens	GDAP1	Immunofluorescence//In situ hybridization//Luciferase reporter assay//Northern blot//qRT-PCR//Western blot	Functional MTI	20827281
	hsa-miR-21-5p	Homo sapiens	GDF5	Luciferase reporter assay//qRT-PCR//Western blot	Functional MTI	24577233
	hsa-miR-133a-5p	Homo sapiens	GDNF	In situ hybridization//Luciferase reporter assay	Functional MTI	26681446
	hsa-miR-200a-3p	Homo sapiens	GEMIN2	Reporter assay	Functional MTI	18381893
	hsa-miR-34a-5p	Homo sapiens	GFRA3	Luciferase reporter assay//qRT-PCR//Western blot	Functional MTI	28356515
	hsa-miR-149-5p	Homo sapiens	GIT1	Immunofluorescence//Immunohistochemistry//Luciferase reporter assay//Microarray//qRT-PCR//Western blot	Functional MTI	24608434
	hsa-miR-200a-3p	Homo sapiens	GJA1	Luciferase reporter assay//qRT-PCR//Western blot	Functional MTI	26283635
	hsa-miR-125b-5p	Homo sapiens	GLI1	Luciferase reporter assay	Functional MTI	18756266
	hsa-miR-137	Homo sapiens	GLIPR1	Luciferase reporter assay//qRT-PCR//Western blot	Functional MTI	23714687
	hsa-miR-16-5p	Homo sapiens	GLS2	Luciferase reporter assay//qRT-PCR//Western blot	Functional MTI	26373319
	hsa-miR-29a-3p	Homo sapiens	GLUL	Immunoblot//Luciferase reporter assay//Microarray//qRT-PCR	Functional MTI	19951903
	hsa-miR-145-5p	Homo sapiens	GMFB	Reporter assay;Microarray	Functional MTI	21351259
	hsa-miR-145-5p	Homo sapiens	GOLM1	Reporter assay;Microarray	Functional MTI	21351259
	hsa-miR-134-5p	Homo sapiens	GOLPH3	Luciferase reporter assay//qRT-PCR//Western blot	Functional MTI	28260021
	hsa-miR-155-5p	Homo sapiens	GOLT1B	Reporter assay;Other	Non-Functional MTI	20584899
	hsa-miR-10b-5p	Homo sapiens	GP1BA	Luciferase reporter assay//qRT-PCR	Functional MTI	27834869
	hsa-miR-149-5p	Homo sapiens	GPC1	Luciferase reporter assay//qRT-PCR//Western blot	Functional MTI	24463821
	hsa-miR-155-5p	Homo sapiens	GPM6B	Reporter assay	Functional MTI	20680360
	hsa-miR-29a-3p	Homo sapiens	GPR85	Luciferase reporter assay	Functional MTI	24085298
	hsa-miR-200a-3p	Homo sapiens	GRB2	Luciferase reporter assay	Functional MTI	23874841
	hsa-miR-27a-5p	Homo sapiens	GREM1	Luciferase reporter assay//Western blot	Functional MTI	27910957
	hsa-miR-125b-5p	Homo sapiens	GRIN2A	Luciferase reporter assay//qRT-PCR	Functional MTI	20159450
	hsa-miR-335-5p	Homo sapiens	GRM4	Luciferase reporter assay	Functional MTI	26314506
	hsa-miR-34a-5p	Homo sapiens	GRM7	Reporter assay;Proteomics	Functional MTI	21566225
	hsa-miR-182-5p	Homo sapiens	GSK3B	Immunohistochemistry//Luciferase reporter assay//Microarray//qRT-PCR//Western blot	Functional MTI	24335145
	hsa-miR-125b-5p	Homo sapiens	GSS	Luciferase reporter assay//Microarray//qRT-PCR//Western blot	Functional MTI	22723551
	hsa-miR-133b	Homo sapiens	GSTP1	Luciferase reporter assay	Functional MTI	26396496
	hsa-miR-192-5p	Homo sapiens	H3F3A	Luciferase reporter assay//Microarray//qRT-PCR	Functional MTI	28217257
	hsa-miR-155-5p	Homo sapiens	HAL	Reporter assay;Other	Non-Functional MTI	20584899
	hsa-miR-125a-5p	Homo sapiens	HAX1	Luciferase reporter assay//qRT-PCR//Western blot	Functional MTI	27880721
	hsa-miR-155-5p	Homo sapiens	HBP1	Reporter assay;Other	Functional MTI	20584899
	hsa-miR-133b	Homo sapiens	HCN2	Reporter assay	Functional MTI	18458081
	hsa-miR-133b	Homo sapiens	HCN4	Reporter assay;Western blot;qRT-PCR;Other	Functional MTI	18458081
	hsa-miR-34a-5p	Homo sapiens	HDAC1	Reporter assay;Proteomics	Functional MTI	21566225
	hsa-miR-145-5p	Homo sapiens	HDAC11	Luciferase reporter assay//qRT-PCR//Western blot	Functional MTI	23980205
	hsa-miR-145-5p	Homo sapiens	HDAC2	Luciferase reporter assay	Functional MTI	23499894
	hsa-miR-125a-5p	Homo sapiens	HDAC4	Immunohistochemistry//Luciferase reporter assay//Western blot	Functional MTI	25504437
	hsa-miR-125a-5p	Homo sapiens	HDAC5	Flow//Immunoblot//Luciferase reporter assay//qRT-PCR//Western blot	Functional MTI	25531695
	hsa-miR-22-3p	Homo sapiens	HDAC6	Luciferase reporter assay//qRT-PCR//Western blot	Functional MTI	22375943
	hsa-miR-140-5p	Homo sapiens	HDAC7	Luciferase reporter assay//Western blot	Functional MTI	24530397
	hsa-miR-29a-5p	Homo sapiens	HDAC9	Luciferase reporter assay//Western blot	Functional MTI	26441331
	hsa-miR-16-5p	Homo sapiens	HDGF	Luciferase reporter assay//qRT-PCR//Western blot	Functional MTI	23954293
	hsa-miR-7-5p	Homo sapiens	HELLS	Luciferase reporter assay	Functional MTI	18823940
	hsa-miR-155-5p	Homo sapiens	HERC4	Reporter assay;Other	Non-Functional MTI	20584899
	hsa-miR-16-5p	Homo sapiens	HGF	Luciferase reporter assay//qRT-PCR//Western blot	Functional MTI	27683052
	hsa-miR-106b-5p	Homo sapiens	HIF1A	Luciferase reporter assay//qRT-PCR//Western blot	Functional MTI	27325313
	hsa-miR-24-1-5p	Homo sapiens	HIF1AN	Luciferase reporter assay//qRT-PCR//Western blot	Functional MTI	28061479
	hsa-miR-155-5p	Homo sapiens	HIVEP2	Luciferase reporter assay	Functional MTI	18367535
	hsa-miR-125a-5p	Homo sapiens	HK2	Luciferase reporter assay	Functional MTI	22593586
	hsa-miR-152-5p	Homo sapiens	HLA-G	ELISA//Luciferase reporter assay//qRT-PCR	Functional MTI	26187665
	hsa-miR-145-5p	Homo sapiens	HLTF	Reporter assay;Microarray	Functional MTI	21351259
	hsa-let-7b-5p	Homo sapiens	HMGA1	Luciferase reporter assay//Microarray//qRT-PCR//Western blot	Functional MTI	23798998
	hsa-let-7b-5p	Homo sapiens	HMGA2	Luciferase reporter assay//qRT-PCR	Functional MTI	17437991
	hsa-miR-142-3p	Homo sapiens	HMGB1	Luciferase reporter assay//qRT-PCR//Western blot	Functional MTI	26617792
	hsa-miR-205-5p	Homo sapiens	HMGB3	Luciferase reporter assay//qRT-PCR//Western blot	Functional MTI	24098490
	hsa-miR-29a-3p	Homo sapiens	HMGCR	Luciferase reporter assay//qRT-PCR//Western blot	Functional MTI	26246194
	hsa-miR-140-5p	Homo sapiens	HMGN5	Luciferase reporter assay//qRT-PCR//Western blot	Functional MTI	28341864
	hsa-miR-204-5p	Homo sapiens	HMX1	Immunocytochemistry//Luciferase reporter assay//qRT-PCR//Western blot	Functional MTI	24641951
	hsa-miR-15b-5p	Homo sapiens	HNF1A	qRT-PCR//Luciferase reporter assay//Western blot	Functional MTI	24705650
	hsa-miR-34a-5p	Homo sapiens	HNF4A	Luciferase reporter assay//qRT-PCR//Western blot	Functional MTI	20018894
	hsa-miR-34a-5p	Homo sapiens	HNF4G	Luciferase reporter assay//Western blot	Functional MTI	25878394
	hsa-miR-21-5p	Homo sapiens	HNRNPK	Luciferase reporter assay//qRT-PCR	Functional MTI	18829576
	hsa-miR-155-5p	Homo sapiens	HOMEZ	ChIP-seq//Luciferase reporter assay//Western blot	Functional MTI	26497687
	hsa-miR-126-5p	Homo sapiens	HOTAIR	Flow//Luciferase reporter assay//qRT-PCR//Western blot	Functional MTI	27900563
	hsa-miR-125b-5p	Homo sapiens	HOTTIP	Luciferase reporter assay//qRT-PCR	Functional MTI	25424744
	hsa-miR-100-5p	Homo sapiens	HOXA1	Flow//Immunohistochemistry//Luciferase reporter assay//qRT-PCR//Western blot	Functional MTI	24559685
	hsa-miR-142-3p	Homo sapiens	HOXA10	Luciferase reporter assay	Functional MTI	24057258
	hsa-miR-26a-5p	Homo sapiens	HOXA5	Luciferase reporter assay//qRT-PCR	Functional MTI	26219418
	hsa-miR-142-3p	Homo sapiens	HOXA7	Luciferase reporter assay	Functional MTI	24057258
	hsa-miR-142-3p	Homo sapiens	HOXA9	Luciferase reporter assay	Functional MTI	24057258
	hsa-miR-10b-5p	Homo sapiens	HOXB3	Luciferase reporter assay//qRT-PCR//Western blot	Functional MTI	27447302
	hsa-miR-200a-3p	Homo sapiens	HOXB5	Reporter assay	Functional MTI	20005803
	hsa-miR-10b-5p	Homo sapiens	HOXD10	Luciferase reporter assay//Western blot//Reporter assay	Functional MTI	17898713
	hsa-miR-21-5p	Homo sapiens	HPGD	In situ hybridization//Luciferase reporter assay//qRT-PCR//Western blot	Functional MTI	24699315
	hsa-miR-192-5p	Homo sapiens	HRH1	Luciferase reporter assay//qRT-PCR//Reporter assay;Microarray;Other	Functional MTI	19074876
	hsa-miR-100-5p	Homo sapiens	HS3ST2	Luciferase reporter assay//Northern blot//qRT-PCR//Western blot	Functional MTI	25703026
	hsa-miR-18a-5p	Homo sapiens	HSF2	Immunofluorescence//In situ hybridization//Luciferase reporter assay//qRT-PCR//Western blot	Functional MTI	20724452
	hsa-miR-142-3p	Homo sapiens	HSPA1B	Luciferase reporter assay//Western blot	Functional MTI	23635652
	hsa-miR-10b-5p	Homo sapiens	HTATIP2	Luciferase reporter assay//qRT-PCR//Western blot	Functional MTI	24096486
	hsa-miR-96-5p	Homo sapiens	HTR1B	Reporter assay	Functional MTI	18283276
	hsa-miR-22-3p	Homo sapiens	HTR2C	Luciferase reporter assay//Microarray	Functional MTI	21168126
	hsa-miR-193a-3p	Homo sapiens	HYOU1	Luciferase reporter assay//Microarray//Western blot	Functional MTI	28276476
	hsa-miR-96-5p	Homo sapiens	IARS	Luciferase reporter assay	Functional MTI	23583389
	hsa-miR-141-5p	Homo sapiens	ICAM1	Luciferase reporter assay	Functional MTI	26371161
	hsa-miR-125b-5p	Homo sapiens	ICAM2	Luciferase reporter assay//QRTPCR	Functional MTI	23591197
	hsa-miR-21-5p	Homo sapiens	ICOSLG	Luciferase reporter assay//Western blot	Functional MTI	25327529
	hsa-miR-335-5p	Homo sapiens	ID4	Reporter assay;Western blot;Other	Functional MTI	21618216
	hsa-miR-183-5p	Homo sapiens	IDH2	Immunocytochemistry//Luciferase reporter assay//qRT-PCR	Functional MTI	23263745
	hsa-miR-29a-3p	Homo sapiens	IFNAR1	Luciferase reporter assay//Western blot	Functional MTI	27569280
	hsa-let-7b-5p	Homo sapiens	IFNB1	ELISA//Luciferase reporter assay//qRT-PCR	Functional MTI	20130213
	hsa-miR-15a-5p	Homo sapiens	IFNG	Luciferase reporter assay//qRT-PCR	Functional MTI	22379033
	hsa-miR-155-5p	Homo sapiens	IFNGR1	Flow//Luciferase reporter assay//Northern blot	Functional MTI	19877012
	hsa-let-7i-5p	Homo sapiens	IGF1	Luciferase reporter assay//Western blot	Functional MTI	25305490
	hsa-let-7b-5p	Homo sapiens	IGF1R	Immunohistochemistry//Luciferase reporter assay//QRTPCR//Western blot	Functional MTI	23482325
	hsa-miR-100-5p	Homo sapiens	IGF2	Northern blot//qRT-PCR//Western blot//Luciferase reporter assay	Functional MTI	22926517
	hsa-let-7b-5p	Homo sapiens	IGF2BP1	Immunofluorescence//Luciferase reporter assay//qRT-PCR//Western blot	Functional MTI	23824794
	hsa-let-7b-5p	Homo sapiens	IGF2BP2	Immunohistochemistry//Luciferase reporter assay//QRTPCR//Western blot	Functional MTI	23482325
	hsa-miR-34a-5p	Homo sapiens	IGF2BP3	Immunohistochemistry//Luciferase reporter assay//qRT-PCR//Western blot	Functional MTI	28399871
	hsa-miR-211-5p	Homo sapiens	IGF2R	Luciferase reporter assay//Microarray//qRT-PCR//Western blot	Functional MTI	24039954
	hsa-miR-204-5p	Homo sapiens	IGFBP2	Immunoblot//Luciferase reporter assay//Microarray//qRT-PCR	Functional MTI	27487563
	hsa-miR-211-5p	Homo sapiens	IGFBP5	Luciferase reporter assay//Microarray//qRT-PCR//Western blot	Functional MTI	24039954
	hsa-miR-451a	Homo sapiens	IKBKB	Luciferase reporter assay	Functional MTI	23740840
	hsa-miR-155-5p	Homo sapiens	IKBKE	Luciferase reporter assay	Functional MTI	19177201
	hsa-miR-125b-5p	Homo sapiens	IKZF2	Luciferase reporter assay//Microarray//qRT-PCR//Western blot	Functional MTI	22723551
	hsa-miR-125b-5p	Homo sapiens	IKZF3	Luciferase reporter assay//Microarray//qRT-PCR//Western blot	Functional MTI	22723551
	hsa-miR-125b-5p	Homo sapiens	IKZF4	Luciferase reporter assay//Microarray//qRT-PCR//Western blot	Functional MTI	22723551
	hsa-miR-15a-5p	Homo sapiens	IL10RA	Luciferase reporter assay//Microarray//qRT-PCR//Western blot	Functional MTI	26631117
	hsa-miR-204-5p	Homo sapiens	IL11	Luciferase reporter assay	Functional MTI	22629385
	hsa-miR-21-5p	Homo sapiens	IL12A	Luciferase reporter assay//Western blot	Functional MTI	25327529
	hsa-miR-16-5p	Homo sapiens	IL12B	Luciferase reporter assay//qRT-PCR	Functional MTI	26073885
	hsa-let-7i-5p	Homo sapiens	IL13	Luciferase reporter assay//Reporter assay;Other	Functional MTI	21616524
	hsa-miR-155-5p	Homo sapiens	IL13RA1	Luciferase reporter assay	Functional MTI	21097505
	hsa-miR-155-5p	Homo sapiens	IL17RB	Reporter assay;Other	Functional MTI	20584899
	hsa-miR-122-5p	Homo sapiens	IL1A	Luciferase reporter assay//qRT-PCR//Western blot	Functional MTI	26239639
	hsa-miR-21-5p	Homo sapiens	IL1B	Luciferase reporter assay//Microarray//qRT-PCR	Functional MTI	21131358
	hsa-let-7i-5p	Homo sapiens	IL2	Luciferase reporter assay	Functional MTI	27145859
	hsa-miR-205-5p	Homo sapiens	IL24	Luciferase reporter assay//qRT-PCR//Western blot	Functional MTI	20737563
	hsa-miR-205-5p	Homo sapiens	IL32	Luciferase reporter assay//qRT-PCR//Western blot	Functional MTI	20737563
	hsa-miR-429	Homo sapiens	IL4	Immunohistochemistry//Luciferase reporter assay//qRT-PCR//Western blot	Functional MTI	27895317
	hsa-miR-146a-5p	Homo sapiens	IL6	Microarray//Luciferase reporter assay//	Functional MTI	25265569
	hsa-miR-125b-5p	Homo sapiens	IL6R	Luciferase reporter assay//qRT-PCR//Western blot	Functional MTI	22942733
	hsa-miR-145-5p	Homo sapiens	ILK	Luciferase reporter assay//qRT-PCR//Western blot	Functional MTI	23104321
	hsa-miR-34a-5p	Homo sapiens	IMPA1	Luciferase reporter assay	Functional MTI	22301190
	hsa-miR-29a-3p	Homo sapiens	IMPDH1	Luciferase reporter assay	Non-Functional MTI	17724173
	hsa-miR-34a-5p	Homo sapiens	IMPDH2	Luciferase reporter assay	Functional MTI	22301190
	hsa-miR-34a-5p	Homo sapiens	INHBB	Luciferase reporter assay//qRT-PCR//Western blot	Functional MTI	24446339
	hsa-miR-155-5p	Homo sapiens	INPP5D	qRT-PCR//Luciferase reporter assay//Western blot	Functional MTI	19890474
	hsa-miR-155-5p	Homo sapiens	INPP5F	Reporter assay;Other	Functional MTI	20584899
	hsa-miR-205-5p	Homo sapiens	INPPL1	Western blot//Luciferase reporter assay//Northern blot//Reporter assay;Western blot;Other	Functional MTI	19033458
	hsa-miR-15b-5p	Homo sapiens	INSR	Luciferase reporter assay//qRT-PCR//Western blot	Functional MTI	26179126
	hsa-miR-155-5p	Homo sapiens	INTS6	Reporter assay;Other	Functional MTI	20584899
	hsa-miR-146a-5p	Homo sapiens	IRAK1	Luciferase reporter assay//Western blot	Functional MTI	20061417
	hsa-miR-18a-5p	Homo sapiens	IRF2	Immunohistochemistry//In situ hybridization//Luciferase reporter assay//qRT-PCR//Western blot	Functional MTI	26173586
	hsa-miR-125b-5p	Homo sapiens	IRF4	qRT-PCR//Luciferase reporter assay	Functional MTI	20497960
	hsa-miR-22-3p	Homo sapiens	IRF5	Luciferase reporter assay//qRT-PCR//Western blot	Functional MTI	23303785
	hsa-miR-1225-5p	Homo sapiens	IRS1	Immunofluorescence//Immunohistochemistry//Luciferase reporter assay//Microarray//qRT-PCR//Western blot	Functional MTI	26684358
	hsa-let-7b-5p	Homo sapiens	IRS2	Flow//Luciferase reporter assay//qRT-PCR//Western blot	Functional MTI	24810113
	hsa-miR-146a-5p	Homo sapiens	IS2	Luciferase reporter assay//Microarray//qRT-PCR//Western blot	Functional MTI	26238771
	hsa-miR-21-5p	Homo sapiens	ISCU	Immunoblot//Immunohistochemistry//Luciferase reporter assay//qRT-PCR//Western blot	Functional MTI	20480266
	hsa-miR-106b-5p	Homo sapiens	ITCH	Luciferase reporter assay	Functional MTI	19074548
	hsa-miR-29a-3p	Homo sapiens	ITGA11	Luciferase reporter assay//Microarray//Northern blot//qRT-PCR	Functional MTI	20971881
	hsa-miR-205-5p	Homo sapiens	ITGA5	Immunohistochemistry//Luciferase reporter assay//qRT-PCR//Western blot	Functional MTI	24434435
	hsa-miR-29a-3p	Homo sapiens	ITGA6	Luciferase reporter assay//qRT-PCR//Western blot	Functional MTI	24091622
	hsa-miR-192-5p	Homo sapiens	ITGAV	Immunofluorescence//Luciferase reporter assay//Western blot	Functional MTI	26506238
	hsa-miR-134-5p	Homo sapiens	ITGB1	Luciferase reporter assay//Microarray//qRT-PCR	Functional MTI	24498348
	hsa-miR-192-5p	Homo sapiens	ITGB3	Immunofluorescence//Luciferase reporter assay//Western blot	Functional MTI	26506238
	hsa-miR-145-5p	Homo sapiens	ITGB8	Immunofluorescence//Luciferase reporter assay//qRT-PCR//GFP reporter assay//In situ hybridization//Microarray//Western blot	Functional MTI	21701675
	hsa-miR-29a-3p	Homo sapiens	ITIH5	Luciferase reporter assay	Non-Functional MTI	20566844
	hsa-miR-424-5p	Homo sapiens	ITPR1	Luciferase reporter assay	Non-Functional MTI	20065103
	hsa-miR-145-5p	Homo sapiens	JADE1	Reporter assay;Microarray	Functional MTI	21351259
	hsa-miR-145-5p	Homo sapiens	JAG1	Immunoprecipitaion//Luciferase reporter assay//Microarray//qRT-PCR//Western blot	Non-Functional MTI	21685392
	hsa-miR-106b-5p	Homo sapiens	JAK1	Luciferase reporter assay//qRT-PCR//Western blot	Functional MTI	25307786
	hsa-miR-204-5p	Homo sapiens	JAK2	Luciferase reporter assay//qRT-PCR//Western blot	Functional MTI	27323056
	hsa-miR-155-5p	Homo sapiens	JARID2	qRT-PCR//Luciferase reporter assay	Functional MTI	19759154
	hsa-miR-155-5p	Homo sapiens	JCHAIN	Reporter assay;Other	Non-Functional MTI	20584899
	hsa-miR-21-5p	Homo sapiens	JMY	Luciferase reporter assay//qRT-PCR	Functional MTI	18829576
	hsa-miR-155-5p	Homo sapiens	JUN	Luciferase reporter assay//qRT-PCR//Western blot	Functional MTI	22508041
	hsa-miR-106b-5p	Homo sapiens	KAT2B	Western blot//Luciferase reporter assay	Functional MTI	18728182
	hsa-miR-155-5p	Homo sapiens	KBTBD2	Reporter assay;Other	Functional MTI	20584899
	hsa-miR-133b	Homo sapiens	KCNH2	Luciferase reporter assay//qRT-PCR//Western blot	Functional MTI	17344217
	hsa-miR-205-5p	Homo sapiens	KCNJ10	Luciferase reporter assay//qRT-PCR//Western blot	Functional MTI	23950153
	hsa-miR-211-5p	Homo sapiens	KCNMA1	Microarray//LacZ reporter assay	Functional MTI	21072171
	hsa-miR-137	Homo sapiens	KDM1A	Luciferase reporter assay//Microarray//qRT-PCR//Western blot	Functional MTI	20682795
	hsa-miR-137	Homo sapiens	KDM2A	Luciferase reporter assay//qRT-PCR//Western blot	Functional MTI	26461474
	hsa-miR-155-5p	Homo sapiens	KDM3A	In situ hybridization//Luciferase reporter assay//qRT-PCR//Western blot//Immunohistochemistry//Microarray	Functional MTI	21541331
	hsa-miR-137	Homo sapiens	KDM4A	Luciferase reporter assay//qRT-PCR//Western blot	Functional MTI	26461474
	hsa-miR-137	Homo sapiens	KDM5B	Luciferase reporter assay//qRT-PCR//Western blot	Functional MTI	26621457
	hsa-miR-137	Homo sapiens	KDM7A	Luciferase reporter assay//qRT-PCR//Western blot	Functional MTI	26461474
	hsa-miR-15b-5p	Homo sapiens	KDR	Luciferase reporter assay//qRT-PCR//Western blot	Functional MTI	23688497
	hsa-miR-141-5p	Homo sapiens	KEAP1	Luciferase reporter assay//Microarray//qRT-PCR//Western blot	Functional MTI	25896253
	hsa-miR-192-5p	Homo sapiens	KIF20B	Luciferase reporter assay//qRT-PCR//Reporter assay;Microarray	Functional MTI	19074876
	hsa-miR-424-5p	Homo sapiens	KIF23	Luciferase reporter assay	Functional MTI	19956200
	hsa-miR-183-5p	Homo sapiens	KIF2A	Immunoblot//Immunocytochemistry//Luciferase reporter assay//qRT-PCR//Reporter assay;Other	Functional MTI	19940135
	hsa-miR-137	Homo sapiens	KIT	Luciferase reporter assay//qRT-PCR//Western blot	Functional MTI	24465609
	hsa-miR-10b-5p	Homo sapiens	KL	Luciferase reporter assay//Western blot	Functional MTI	25988292
	hsa-miR-34a-5p	Homo sapiens	KLB	Luciferase reporter assay	Functional MTI	22988100
	hsa-miR-125b-5p	Homo sapiens	KLC2	Luciferase reporter assay//qRT-PCR//Western blot	Functional MTI	25668010
	hsa-miR-200a-3p	Homo sapiens	KLF11	Reporter assay	Functional MTI	20005803
	hsa-miR-137	Homo sapiens	KLF12	Luciferase reporter assay//qRT-PCR//Western blot	Functional MTI	27468717
	hsa-miR-125a-5p	Homo sapiens	KLF13	ELISA//Luciferase reporter assay//qRT-PCR//Western blot	Functional MTI	20589685
	hsa-miR-10b-5p	Homo sapiens	KLF4	Luciferase reporter assay//Western blot	Functional MTI	20075075
	hsa-miR-145-5p	Homo sapiens	KLF5	Luciferase reporter assay//qRT-PCR//Western blot	Functional MTI	23128394
	hsa-miR-200a-3p	Homo sapiens	KLHL20	Reporter assay	Functional MTI	20005803
	hsa-miR-155-5p	Homo sapiens	KLHL5	Reporter assay;Other	Functional MTI	20584899
	hsa-miR-7-5p	Homo sapiens	KMT5A	Luciferase reporter assay//Western blot	Functional MTI	23720754
	hsa-miR-134-5p	Homo sapiens	KRAS	Luciferase reporter assay//qRT-PCR//Western blot	Functional MTI	23775631
	hsa-miR-155-5p	Homo sapiens	KRCC1	Reporter assay;Other	Non-Functional MTI	20584899
	hsa-miR-145-5p	Homo sapiens	KREMEN1	Reporter assay;Microarray	Functional MTI	21351259
	hsa-miR-29a-3p	Homo sapiens	KREMEN2	Luciferase reporter assay//qRT-PCR//Western blot	Functional MTI	20551325
	hsa-miR-146a-5p	Homo sapiens	L1CAM	Luciferase reporter assay	Functional MTI	22711166
	hsa-miR-125b-5p	Homo sapiens	LACTB	Luciferase reporter assay//Western blot	Functional MTI	26603571
	hsa-miR-140-5p	Homo sapiens	LAMC1	Luciferase reporter assay//Western blot	Functional MTI	24530397
	hsa-miR-146a-5p	Homo sapiens	LAMC2	In situ hybridization//Weastern blot//Luciferase reporter assay/qRT-PCR	Functional MTI	25214035
	hsa-miR-26a-5p	Homo sapiens	LARP1	Immunohistochemistry//Luciferase reporter assay//qRT-PCR//Western blot	Functional MTI	26063484
	hsa-miR-93-5p	Homo sapiens	LATS2	Luciferase reporter assay//qRT-PCR//Western blot	Functional MTI	23111389
	hsa-miR-155-5p	Homo sapiens	LCORL	Reporter assay;Other	Functional MTI	20584899
	hsa-miR-34a-5p	Homo sapiens	LDHA	Reporter assay;Proteomics	Functional MTI	21566225
	hsa-miR-375	Homo sapiens	LDHB	Immunohistochemistry//Luciferase reporter assay//Microarray//QRTPCR	Functional MTI	23497265
	hsa-miR-155-5p	Homo sapiens	LDOC1	Luciferase reporter assay//Reporter assay;Other	Functional MTI	17881434
	hsa-miR-34a-5p	Homo sapiens	LEF1	Reporter assay;Proteomics	Functional MTI	21566225
	hsa-miR-125a-5p	Homo sapiens	LFNG	Luciferase reporter assay	Functional MTI	23484856
	hsa-miR-22-3p	Homo sapiens	LGALS9	Flow//Luciferase reporter assay//qRT-PCR//Western blot	Functional MTI	26239725
	hsa-let-7b-5p	Homo sapiens	LGR4	Flow//Luciferase reporter assay//qRT-PCR//Western blot	Functional MTI	27179410
	hsa-miR-142-3p	Homo sapiens	LGR5	Luciferase reporter assay//Western blot	Functional MTI	23619912
	hsa-miR-125a-5p	Homo sapiens	LIFR	Luciferase reporter assay//Western blot	Functional MTI	21788734
	hsa-let-7b-5p	Homo sapiens	LIN28A	Luciferase reporter assay//Reporter assay	Functional MTI	15131085
	hsa-let-7b-5p	Homo sapiens	LIN28B	Luciferase reporter assay	Functional MTI	16971064
	hsa-miR-155-5p	Homo sapiens	LIN7C	Reporter assay;Other	Non-Functional MTI	20584899
	hsa-miR-125b-5p	Homo sapiens	LIPA	Luciferase reporter assay//Microarray//qRT-PCR//Western blot	Functional MTI	22723551
	hsa-miR-205-5p	Homo sapiens	LMNA	Luciferase reporter assay//Microarray	Functional MTI	25597268
	hsa-miR-192-5p	Homo sapiens	LMNB2	Luciferase reporter assay//qRT-PCR//Western blot//Reporter assay;Western blot;Microarray;Other	Functional MTI	19074876
	hsa-miR-155-5p	Homo sapiens	LNX2	Reporter assay;Other	Functional MTI	20584899
	hsa-miR-29a-3p	Homo sapiens	LOX	Luciferase reporter assay	Functional MTI	22745231
	hsa-miR-26a-5p	Homo sapiens	LOXL2	Luciferase reporter assay	Functional MTI	26983694
	hsa-miR-122-5p	Homo sapiens	LPIN1	Luciferase reporter assay//qRT-PCR//Western blot	Functional MTI	28287811
	hsa-miR-29a-3p	Homo sapiens	LPL	ELISA//Luciferase reporter assay//qRT-PCR//Western blot	Functional MTI	21276447
	hsa-miR-142-3p	Homo sapiens	LPP	Luciferase reporter assay	Functional MTI	24361879
	hsa-miR-335-5p	Homo sapiens	LRG1	Immunofluorescence//Immunoprecipitaion//Luciferase reporter assay//Microarray//qRT-PCR//Western blot	Functional MTI	22382496
	hsa-miR-155-5p	Homo sapiens	LRIF1	Reporter assay;Other	Functional MTI	20584899
	hsa-let-7b-5p	Homo sapiens	LRIG1	Luciferase reporter assay//Microarray//qRT-PCR	Non-Functional MTI	22995917
	hsa-miR-205-5p	Homo sapiens	LRP1	qRT-PCR//Luciferase reporter assay//Western blot	Functional MTI	19665999
	hsa-miR-146a-5p	Homo sapiens	LRP2	Luciferase reporter assay//qRT-PCR//Western blot	Functional MTI	27241555
	hsa-miR-375	Homo sapiens	LRP5	Luciferase reporter assay	Functional MTI	28158288
	hsa-miR-183-5p	Homo sapiens	LRP6	Luciferase reporter assay//Western blot	Functional MTI	24289859
	hsa-miR-142-3p	Homo sapiens	LRRC32	Immunofluorescence//Luciferase reporter assay//qRT-PCR//Western blot	Functional MTI	23650616
	hsa-miR-182-5p	Homo sapiens	LRRC4	qRT-PCR//Immunohistochemistry//Luciferase reporter assay	Functional MTI	24404152
	hsa-miR-155-5p	Homo sapiens	LRRC59	Reporter assay;Other	Functional MTI	20584899
	hsa-miR-191-5p	Homo sapiens	LRRC8A	Immunoprecipitation//In situ hybridization//Luciferase assay//Microarray//Northern blot//QRTPCR//Western blot	Functional MTI	23505378
	hsa-miR-21-5p	Homo sapiens	LRRFIP1	semi-qRT-PCR//Luciferase reporter assay//Western blot	Functional MTI	19559015
	hsa-miR-205-5p	Homo sapiens	LRRK2	Luciferase reporter assay//qRT-PCR//Western blot	Functional MTI	23125283
	hsa-miR-145-5p	Homo sapiens	LYPLA2	Reporter assay;Microarray	Functional MTI	21351259
	hsa-miR-135b-5p	Homo sapiens	LZTS1	Immunohistochemistry//Luciferase reporter assay//qRT-PCR//Western blot	Functional MTI	23695671
	hsa-miR-204-5p	Homo sapiens	M6PR	Immunoblot//Luciferase reporter assay//Microarray//qRT-PCR//Western blot	Functional MTI	21282569
	hsa-miR-200a-3p	Homo sapiens	MACC1	qRT-PCR//Luciferase reporter assay//Western blot	Functional MTI	25482402
	hsa-miR-192-5p	Homo sapiens	MAD2L1	Luciferase reporter assay//qRT-PCR//Western blot//Reporter assay;Western blot;Microarray;Other	Functional MTI	19074876
	hsa-miR-212-5p	Homo sapiens	MAF	ELISA//Flow//Immunohistochemistry//Luciferase reporter assay//qRT-PCR//Western blot	Functional MTI	25862525
	hsa-miR-135b-5p	Homo sapiens	MAFB	Luciferase reporter assay//Microarray//qRT-PCR	Functional MTI	20981674
	hsa-miR-34a-5p	Homo sapiens	MAGEA12	Immunohistochemistry//Luciferase reporter assay//qRT-PCR//Western blot	Functional MTI	21177782
	hsa-miR-34a-5p	Homo sapiens	MAGEA2	Immunocytochemistry//Luciferase reporter assay//qRT-PCR//Western blot	Functional MTI	21177782
	hsa-miR-34a-5p	Homo sapiens	MAGEA3	Immunocytochemistry//Luciferase reporter assay//qRT-PCR//Western blot	Functional MTI	21177782
	hsa-miR-34a-5p	Homo sapiens	MAGEA6	Immunocytochemistry//Luciferase reporter assay//qRT-PCR//Western blot	Functional MTI	21177782
	hsa-miR-134-5p	Homo sapiens	MAGI2	Luciferase reporter assay//Microarray//qRT-PCR//Western blot	Functional MTI	24258346
	hsa-miR-200a-3p	Homo sapiens	MALAT1	Luciferase reporter assay//qRT-PCR	Functional MTI	26461224
	hsa-miR-125b-5p	Homo sapiens	MAN1B1	Luciferase reporter assay//qRT-PCR//Western blot	Functional MTI	23940818
	hsa-miR-22-3p	Homo sapiens	MAOA	Luciferase reporter assay//Microarray	Functional MTI	21168126
	hsa-miR-34a-5p	Homo sapiens	MAP2K1	qRT-PCR//Luciferase reporter assay//Western blot//Northern blot	Functional MTI	20299489
	hsa-miR-21-5p	Homo sapiens	MAP2K3	Immunohistochemistry//Luciferase reporter assay//Western blot	Functional MTI	24112539
	hsa-miR-145-5p	Homo sapiens	MAP2K6	Reporter assay;Microarray	Functional MTI	21351259
	hsa-miR-451a	Homo sapiens	MAP3K1	Luciferase reporter assay//Western blot	Functional MTI	26019450
	hsa-miR-155-5p	Homo sapiens	MAP3K10	Luciferase reporter assay	Functional MTI	23189122
	hsa-miR-125b-5p	Homo sapiens	MAP3K11	Luciferase reporter assay//Microarray//qRT-PCR//Western blot	Functional MTI	26138442
	hsa-miR-155-5p	Homo sapiens	MAP3K14	Reporter assay	Functional MTI	20584899
	hsa-miR-26a-5p	Homo sapiens	MAP3K2	GFP reporter assay//Luciferase reporter assay//Western blot	Functional MTI	20080666
	hsa-miR-10a-5p	Homo sapiens	MAP3K7	Luciferase reporter assay//Microarray//qRT-PCR//Western blot//Reporter assay;Other	Functional MTI	20624982
	hsa-miR-375	Homo sapiens	MAP3K8	Luciferase reporter assay	Functional MTI	23430746
	hsa-miR-34a-5p	Homo sapiens	MAP3K9	Luciferase reporter assay//qRT-PCR//Western blot	Non-Functional MTI	21266077
	hsa-miR-520e	Homo sapiens	MAP4K4	Luciferase reporter assay//qRT-PCR//Western blot	Functional MTI	22105365
	hsa-miR-16-5p	Homo sapiens	MAP7	Luciferase reporter assay//Western blot//Microarray//qRT-PCR	Functional MTI	23941513
	hsa-miR-335-5p	Homo sapiens	MAPK1	Immunofluorescence//Immunoprecipitaion//Luciferase reporter assay//Microarray//qRT-PCR//Western blot	Functional MTI	22382496
	hsa-miR-122-5p	Homo sapiens	MAPK11	Luciferase reporter assay//qRT-PCR	Functional MTI	19296470
	hsa-miR-155-5p	Homo sapiens	MAPK13	Luciferase reporter assay	Functional MTI	25535908
	hsa-miR-125a-5p	Homo sapiens	MAPK14	Luciferase reporter assay	Functional MTI	28386337
	hsa-miR-483-5p	Homo sapiens	MAPK3	Luciferase reporter assay//Microarray//qRT-PCR//Western blot	Functional MTI	22465663
	hsa-miR-10a-5p	Homo sapiens	MAPK8IP1	Luciferase reporter assay//qRT-PCR	Functional MTI	28454224
	hsa-miR-106b-5p	Homo sapiens	MAPK9	Luciferase reporter assay	Non-Functional MTI	21283765
	hsa-miR-10b-5p	Homo sapiens	MAPRE1	Luciferase reporter assay	Functional MTI	21562367
	hsa-miR-21-5p	Homo sapiens	MARCKS	Luciferase reporter assay//Western blot	Functional MTI	19302977
	hsa-miR-155-5p	Homo sapiens	MARF1	Reporter assay;Other	Functional MTI	20584899
	hsa-miR-155-5p	Homo sapiens	MASTL	Reporter assay;Other	Functional MTI	18668040
	hsa-miR-155-5p	Homo sapiens	MATR3	Luciferase reporter assay//Reporter assay;Other	Functional MTI	17881434
	hsa-miR-221-5p	Homo sapiens	MBD2	ChIP-seq//In situ hybridization//Luciferase reporter assay//Microarray//qRT-PCR//Western blot	Functional MTI	23770133
	hsa-miR-10b-5p	Homo sapiens	MBNL1	Luciferase reporter assay	Functional MTI	26881967
	hsa-miR-10b-5p	Homo sapiens	MBNL2	Luciferase reporter assay	Functional MTI	26881967
	hsa-miR-10b-5p	Homo sapiens	MBNL3	Luciferase reporter assay	Functional MTI	26881967
	hsa-miR-122-3p	Homo sapiens	MCAT	Luciferase reporter assay//Next Generation Sequencing (NGS)//qRT-PCR	Functional MTI	27855320
	hsa-miR-125a-5p	Homo sapiens	MCL1	Luciferase reporter assay//qRT-PCR//Western blot	Functional MTI	26297542
	hsa-miR-192-5p	Homo sapiens	MCM10	Luciferase reporter assay//qRT-PCR//Reporter assay;Microarray;Other	Functional MTI	19074876
	hsa-miR-145-5p	Homo sapiens	MCM2	Luciferase reporter assay	Functional MTI	25354783
	hsa-miR-155-5p	Homo sapiens	MCM8	Reporter assay;Other	Functional MTI	20584899
	hsa-miR-145-5p	Homo sapiens	MDM2	Luciferase reporter assay	Functional MTI	22330136
	hsa-miR-191-5p	Homo sapiens	MDM4	Luciferase reporter assay	Functional MTI	21084273
	hsa-miR-22-3p	Homo sapiens	MECOM	5RACE//ChIP//Co-immunoprecipitation//Luciferase reporter assay//Northern blot//Western blot	Functional MTI	27617961
	hsa-miR-122-5p	Homo sapiens	MECP2	Luciferase reporter assay//qRT-PCR	Functional MTI	19296470
	hsa-miR-137	Homo sapiens	MED1	Luciferase reporter assay//qRT-PCR//Western blot	Functional MTI	26461474
	hsa-miR-155-5p	Homo sapiens	MEF2A	Reporter assay;Other	Functional MTI	20584899
	hsa-miR-21-5p	Homo sapiens	MEF2C	Immunofluorescence//In situ hybridization//Luciferase reporter assay	Functional MTI	21170291
	hsa-miR-122-5p	Homo sapiens	MEF2D	Luciferase reporter assay	Functional MTI	24390737
	hsa-miR-125a-5p	Homo sapiens	MEG3	ELISA//Luciferase reporter assay//qRT-PCR//Western blot	Functional MTI	27522004
	hsa-miR-125b-5p	Homo sapiens	MEGF9	Luciferase reporter assay//Western blot	Functional MTI	24098452
	hsa-miR-155-5p	Homo sapiens	MEIS1	Luciferase reporter assay//qRT-PCR//Western blot	Functional MTI	18950466
	hsa-miR-204-5p	Homo sapiens	MEIS2	Luciferase reporter assay//Western blot	Functional MTI	20713703
	hsa-miR-335-5p	Homo sapiens	MERTK	Luciferase reporter assay//Microarray//Microarray;Other	Functional MTI	18185580
	hsa-miR-145-5p	Homo sapiens	MEST	Reporter assay;Microarray	Functional MTI	21351259
	hsa-miR-133b	Homo sapiens	MET	Reporter assay	Functional MTI	20505319
	hsa-miR-16-5p	Homo sapiens	METTL13	Luciferase reporter assay//qRT-PCR//Western blot	Functional MTI	26031775
	hsa-miR-106b-5p	Homo sapiens	MFN2	Luciferase reporter assay//qRT-PCR//Western blot	Functional MTI	23954742
	hsa-miR-135b-5p	Homo sapiens	MID1	Luciferase reporter assay//Western blot	Functional MTI	23623609
	hsa-miR-146a-5p	Homo sapiens	MIF	Luciferase reporter assay//qRT-PCR//Western blot	Functional MTI	27569893
	hsa-miR-192-5p	Homo sapiens	MIS12	Luciferase reporter assay//qRT-PCR//Reporter assay;Microarray;Other	Functional MTI	19074876
	hsa-miR-137	Homo sapiens	MITF	Luciferase reporter assay//qRT-PCR//Western blot	Functional MTI	21051724
	hsa-miR-145-5p	Homo sapiens	MIXL1	Reporter assay;Microarray	Functional MTI	21351259
	hsa-miR-155-5p	Homo sapiens	MLH1	Luciferase reporter assay//Western blot//Northern blot	Functional MTI	20351277
	hsa-miR-140-5p	Homo sapiens	MMD	Luciferase reporter assay	Functional MTI	24971538
	hsa-miR-145-5p	Homo sapiens	MMP1	Reporter assay;Microarray	Functional MTI	21351259
	hsa-miR-125a-5p	Homo sapiens	MMP11	Immunohistochemistry//Luciferase reporter assay//qRT-PCR//Western blot	Functional MTI	22768249
	hsa-miR-145-5p	Homo sapiens	MMP12	Reporter assay;Microarray	Functional MTI	21351259
	hsa-miR-125b-5p	Homo sapiens	MMP13	Luciferase reporter assay	Functional MTI	22782903
	hsa-miR-10a-5p	Homo sapiens	MMP14	GFP reporter assay//qRT-PCR//Western blot	Functional MTI	28383561
	hsa-miR-155-5p	Homo sapiens	MMP16	Immunohistochemistry//Luciferase reporter assay//qRT-PCR//Western blot//Zymography	Functional MTI	22348515
	hsa-miR-106b-5p	Homo sapiens	MMP2	Luciferase reporter assay	Functional MTI	24164962
	hsa-miR-125b-5p	Homo sapiens	MMP26	Luciferase reporter assay	Functional MTI	27143441
	hsa-miR-93-5p	Homo sapiens	MMP3	Luciferase reporter assay//qRT-PCR//Western blot	Functional MTI	26175939
	hsa-miR-126-5p	Homo sapiens	MMP7	Luciferase reporter assay	Functional MTI	23437250
	hsa-miR-133a-5p	Homo sapiens	MMP9	Luciferase reporter assay//qRT-PCR//Western blot	Functional MTI	25607810
	hsa-miR-15a-5p	Homo sapiens	MN1	Luciferase reporter assay//Microarray//Northern blot//qRT-PCR//Western blot	Functional MTI	21880628
	hsa-miR-200a-3p	Homo sapiens	MNX1	Luciferase reporter assay//qRT-PCR//Western blot	Functional MTI	26801823
	hsa-miR-155-5p	Homo sapiens	MORC3	Reporter assay;Other	Functional MTI	20584899
	hsa-miR-155-5p	Homo sapiens	MPP5	Reporter assay;Other	Functional MTI	20584899
	hsa-miR-155-5p	Homo sapiens	MRPL18	Reporter assay;Other	Functional MTI	20584899
	hsa-miR-155-5p	Homo sapiens	MRPS27	Reporter assay;Other	Functional MTI	20584899
	hsa-miR-155-5p	Homo sapiens	MSH2	Luciferase reporter assay//Western blot//Northern blot	Functional MTI	20351277
	hsa-miR-145-5p	Homo sapiens	MSH3	Luciferase reporter assay//qRT-PCR//Western blot	Functional MTI	26852750
	hsa-miR-155-5p	Homo sapiens	MSH6	Luciferase reporter assay//Western blot//Northern blot	Functional MTI	20351277
	hsa-miR-137	Homo sapiens	MSI1	Immunoblot//Luciferase reporter assay	Functional MTI	25940441
	hsa-miR-21-5p	Homo sapiens	MSLN	Luciferase reporter assay	Functional MTI	28125734
	hsa-miR-375	Homo sapiens	MST1R	Luciferase reporter assay//qRT-PCR//Western blot	Functional MTI	27689991
	hsa-miR-22-3p	Homo sapiens	MTA1	Immunofluorescence//Immunohistochemistry//Luciferase reporter assay//qRT-PCR	Functional MTI	28231399
	hsa-miR-34a-5p	Homo sapiens	MTA2	Reporter assay;Western blot;Other	Functional MTI	20018894
	hsa-miR-21-5p	Homo sapiens	MTAP	Western blot//Northern blot//qRT-PCR//Luciferase reporter assay	Functional MTI	19013014
	hsa-miR-135b-5p	Homo sapiens	MTCH2	Luciferase reporter assay//Western blot	Functional MTI	23623609
	hsa-miR-137	Homo sapiens	MTDH	Luciferase reporter assay	Functional MTI	24144591
	hsa-miR-149-5p	Homo sapiens	MTHFR	Immunoblot//Luciferase reporter assay//qRT-PCR//Western blot	Functional MTI	28045918
	hsa-miR-145-5p	Homo sapiens	MTMR14	Reporter assay;Microarray	Functional MTI	21351259
	hsa-miR-99a-5p	Homo sapiens	MTMR3	Luciferase reporter assay//qRT-PCR//Western blot	Functional MTI	23731011
	hsa-miR-100-5p	Homo sapiens	MTOR	Luciferase reporter assay//qRT-PCR//Western blot	Functional MTI	23292834
	hsa-let-7b-5p	Homo sapiens	MTPN	Reporter assay	Functional MTI	15806104
	hsa-miR-15b-5p	Homo sapiens	MTSS1	Luciferase reporter assay//qRT-PCR//Western blot	Functional MTI	25783158
	hsa-miR-125b-5p	Homo sapiens	MUC1	Reporter assay;Western blot	Functional MTI	20729973
	hsa-miR-211-5p	Homo sapiens	MUC4	Luciferase reporter assay//Microarray//qRT-PCR//Western blot	Functional MTI	27923652
	hsa-miR-204-5p	Homo sapiens	MX1	Luciferase reporter assay	Functional MTI	27121770
	hsa-miR-125b-5p	Homo sapiens	MXD1	Immunofluorescence//Immunohistochemistry//Luciferase reporter assay//qRT-PCR//Western blot	Functional MTI	23099851
	hsa-miR-155-5p	Homo sapiens	MXI1	Luciferase reporter assay//qRT-PCR//Western blot	Functional MTI	24376632
	hsa-miR-155-5p	Homo sapiens	MYB	Immunohistochemistry//Luciferase reporter assay//Northern blot//qRT-PCR//Western blot	Functional MTI	21062812
	hsa-miR-155-5p	Homo sapiens	MYBL1	Reporter assay;Other	Functional MTI	20584899
	hsa-miR-126-5p	Homo sapiens	MYC	Immunoblot//Luciferase reporter assay//qRT-PCR	Functional MTI	22972034
	hsa-miR-22-3p	Homo sapiens	MYCBP	Immunoblot//Luciferase reporter assay//qRT-PCR	Functional MTI	20562918
	hsa-miR-29a-3p	Homo sapiens	MYCN	Luciferase reporter assay//qRT-PCR	Functional MTI	21835775
	hsa-miR-21-5p	Homo sapiens	MYD88	Chip//ELISA//Flow cytometry//Luciferase reporter assay//QRTPCR//Western blot	Functional MTI	23633945
	hsa-miR-200a-3p	Homo sapiens	MYH10	Luciferase reporter assay//Western blot	Functional MTI	24858044
	hsa-miR-155-5p	Homo sapiens	MYLK	Luciferase reporter assay//qRT-PCR//Western blot	Functional MTI	24486510
	hsa-miR-155-5p	Homo sapiens	MYO10	Luciferase reporter assay//qRT-PCR//Western blot	Functional MTI	20427544
	hsa-miR-137	Homo sapiens	MYO1C	Luciferase reporter assay//qRT-PCR//Western blot	Functional MTI	27468717
	hsa-miR-155-5p	Homo sapiens	MYO1D	Reporter assay;Other	Non-Functional MTI	20584899
	hsa-miR-145-5p	Homo sapiens	MYO5A	Luciferase reporter assay	Functional MTI	22895360
	hsa-miR-145-5p	Homo sapiens	MYO6	qRT-PCR//Luciferase reporter assay//Western blot	Functional MTI	20353999
	hsa-miR-145-5p	Homo sapiens	MYOCD	Luciferase reporter assay//qRT-PCR//Western blot	Functional MTI	26181633
	hsa-miR-145-5p	Homo sapiens	MYRF	Luciferase reporter assay	Non-Functional MTI	20737575
	hsa-miR-125a-5p	Homo sapiens	NAIF1	Luciferase reporter assay//qRT-PCR//Western blot	Functional MTI	26719710
	hsa-miR-145-5p	Homo sapiens	NAIP	Luciferase reporter assay//qRT-PCR//Western blot	Functional MTI	26459459
	hsa-miR-26a-5p	Homo sapiens	NAMPT	ELISA//Luciferase reporter assay//qRT-PCR//Western blot	Functional MTI	28276108
	hsa-miR-145-5p	Homo sapiens	NANOG	Luciferase reporter assay	Functional MTI	23541921
	hsa-miR-155-5p	Homo sapiens	NARS	Reporter assay;Other	Functional MTI	20584899
	hsa-miR-29a-3p	Homo sapiens	NASP	Luciferase reporter assay//Western blot	Functional MTI	22080513
	hsa-miR-21-5p	Homo sapiens	NAV3	Western blot//Luciferase reporter assay/Microarray	Functional MTI	25579119
	hsa-miR-122-5p	Homo sapiens	NCAM1	Luciferase reporter assay//qRT-PCR	Functional MTI	19296470
	hsa-miR-21-5p	Homo sapiens	NCAPG	Luciferase reporter assay//Quantitative proteomic approach	Functional MTI	19253296
	hsa-miR-22-3p	Homo sapiens	NCOA1	Luciferase reporter assay//Western blot	Functional MTI	21798241
	hsa-miR-137	Homo sapiens	NCOA2	Luciferase reporter assay//qRT-PCR//Western blot	Non-Functional MTI	18381414
	hsa-miR-137	Homo sapiens	NCOA3	Immunoblot//Luciferase reporter assay//qRT-PCR	Functional MTI	26066330
	hsa-miR-100-5p	Homo sapiens	NCOR2	Immunoblot//Immunohistochemistry//Luciferase reporter assay//qRT-PCR	Functional MTI	24244722
	hsa-miR-16-5p	Homo sapiens	NCSTN	ELISA//Immunoprecipitaion//Luciferase reporter assay//qRT-PCR//Western blot	Functional MTI	26440600
	hsa-miR-182-5p	Homo sapiens	NDRG1	Luciferase reporter assay	Functional MTI	23874837
	hsa-miR-145-5p	Homo sapiens	NDRG2	Reporter assay;Microarray	Functional MTI	21351259
	hsa-miR-191-5p	Homo sapiens	NDST1	GFP reporter assay//qRT-PCR//Western blot	Functional MTI	21947487
	hsa-miR-145-5p	Homo sapiens	NDUFA4	Reporter assay;Microarray	Functional MTI	21351259
	hsa-miR-145-5p	Homo sapiens	NEDD9	Luciferase reporter assay	Functional MTI	23355420
	hsa-miR-125b-5p	Homo sapiens	NES	Luciferase reporter assay	Functional MTI	23016664
	hsa-miR-22-3p	Homo sapiens	NET1	Luciferase reporter assay//qRT-PCR//Western blot	Functional MTI	25041463
	hsa-miR-125b-5p	Homo sapiens	NEU1	Immunohistochemistry//Luciferase reporter assay//qRT-PCR//Western blot	Functional MTI	27220320
	hsa-let-7i-5p	Homo sapiens	NEUROG1	ChIP-seq//GFP reporter assay//Immunocytochemistry//Immunohistochemistry//Luciferase reporter assay//qRT-PCR	Functional MTI	23884650
	hsa-miR-10b-5p	Homo sapiens	NF1	GFP reporter assay//Luciferase reporter assay//Microarray//qRT-PCR	Functional MTI	20550523
	hsa-miR-146a-5p	Homo sapiens	NFAT5	Luciferase reporter assay	Functional MTI	25515214
	hsa-miR-145-5p	Homo sapiens	NFATC1	Luciferase reporter assay	Functional MTI	24043548
	hsa-miR-122-5p	Homo sapiens	NFATC2IP	Luciferase reporter assay//qRT-PCR	Functional MTI	19296470
	hsa-miR-29a-3p	Homo sapiens	NFIA	Luciferase reporter assay	Functional MTI	24085298
	hsa-miR-21-5p	Homo sapiens	NFIB	Luciferase reporter assay//qRT-PCR//Western blot	Functional MTI	18384814
	hsa-miR-183-5p	Homo sapiens	NFIL3	Luciferase reporter assay//qRT-PCR	Functional MTI	24423866
	hsa-miR-146a-5p	Homo sapiens	NFKB1	Luciferase reporter assay	Functional MTI	18504431
	hsa-miR-192-5p	Homo sapiens	NID1	Luciferase reporter assay//qRT-PCR//Western blot	Functional MTI	25857602
	hsa-miR-145-5p	Homo sapiens	NIPSNAP1	Reporter assay;Microarray	Functional MTI	21351259
	hsa-miR-125b-5p	Homo sapiens	NKIRAS2	ELISA//qRT-PCR//Luciferase reporter assay//Western blot	Functional MTI	20351193
	hsa-miR-34a-5p	Homo sapiens	NLRC5	Luciferase reporter assay//qRT-PCR//Western blot	Functional MTI	27423514
	hsa-miR-29a-3p	Homo sapiens	NMI	Luciferase reporter assay//qRT-PCR//Western blot	Functional MTI	25174825
	hsa-miR-192-5p	Homo sapiens	NOB1	Luciferase reporter assay//qRT-PCR//Western blot	Functional MTI	26743688
	hsa-miR-10a-5p	Homo sapiens	NOD2	Luciferase reporter assay//qRT-PCR	Functional MTI	25281418
	hsa-miR-146a-5p	Homo sapiens	NOS1	Luciferase reporter assay//qRT-PCR	Functional MTI	28218896
	hsa-miR-26a-5p	Homo sapiens	NOS2	Luciferase reporter assay	Functional MTI	26854724
	hsa-miR-155-5p	Homo sapiens	NOS3	Luciferase reporter assay//qRT-PCR//Western blot	Functional MTI	23108656
	hsa-miR-10b-5p	Homo sapiens	NOTCH1	Luciferase reporter assay	Functional MTI	23034333
	hsa-miR-146a-5p	Homo sapiens	NOTCH2	Luciferase reporter assay//Western blot	Functional MTI	27832663
	hsa-miR-483-5p	Homo sapiens	NOTCH3	Luciferase reporter assay//qRT-PCR//Western blot	Functional MTI	25622783
	hsa-miR-155-5p	Homo sapiens	NOVA1	Reporter assay;Other	Non-Functional MTI	20584899
	hsa-miR-99a-5p	Homo sapiens	NOX4	Luciferase reporter assay//qRT-PCR//Western blot	Functional MTI	26986073
	hsa-miR-155-5p	Homo sapiens	NR1H3	Luciferase reporter assay//qRT-PCR//Western blot	Functional MTI	27746237
	hsa-miR-18a-5p	Homo sapiens	NR1I2	Luciferase reporter assay//Western blot	Functional MTI	28408657
	hsa-let-7b-5p	Homo sapiens	NR2E1	immunoblot//Luciferase reporter assay//Northern blot//Western blot	Functional MTI	20133835
	hsa-miR-18a-5p	Homo sapiens	NR3C1	Luciferase reporter assay//Western blot//pMIR-REPORT	Functional MTI	19131573
	hsa-miR-34a-5p	Homo sapiens	NR4A2	Luciferase reporter assay	Functional MTI	27121375
	hsa-miR-10b-5p	Homo sapiens	NR4A3	Reporter assay	Non-Functional MTI	21642433
	hsa-let-7b-5p	Homo sapiens	NRAS	Luciferase reporter assay	Functional MTI	17699775
	hsa-miR-182-5p	Homo sapiens	NRN1	Luciferase reporter assay	Functional MTI	26622652
	hsa-miR-26a-5p	Homo sapiens	NRP1	Immunohistochemistry//Luciferase reporter assay//qRT-PCR//Western blot	Functional MTI	26406949
	hsa-miR-10b-5p	Homo sapiens	NRP2	Reporter assay	Non-Functional MTI	21642433
	hsa-miR-155-5p	Homo sapiens	NSD3	Reporter assay;Other	Functional MTI	21030878
	hsa-miR-122-5p	Homo sapiens	NT5C3A	Luciferase reporter assay	Functional MTI	23055569
	hsa-miR-21-5p	Homo sapiens	NTF3	Luciferase reporter assay//qRT-PCR	Functional MTI	22019057
	hsa-miR-182-5p	Homo sapiens	NTM	Luciferase reporter assay//Western blot	Functional MTI	22917588
	hsa-miR-204-5p	Homo sapiens	NTRK2	Luciferase reporter assay//qRT-PCR//Western blot	Functional MTI	22892391
	hsa-miR-125a-5p	Homo sapiens	NTRK3	Luciferase reporter assay//Western blot	Functional MTI	17483472
	hsa-miR-211-5p	Homo sapiens	NUAK1	Luciferase reporter assay//Western blot//qRT-PCR	Functional MTI	23934065
	hsa-miR-146a-5p	Homo sapiens	NUMB	Luciferase reporter assay	Functional MTI	24092752
	hsa-miR-122-5p	Homo sapiens	NUMBL	Luciferase reporter assay//qRT-PCR	Functional MTI	19296470
	hsa-miR-133b	Homo sapiens	NUP214	Immunoblot//Luciferase reporter assay//qRT-PCR	Functional MTI	25743594
	hsa-miR-15b-5p	Homo sapiens	OIP5	Immunofluorescence//Immunohistochemistry//Luciferase reporter assay//qRT-PCR//Western blot	Functional MTI	28184024
	hsa-miR-429	Homo sapiens	ONECUT2	Luciferase reporter assay//Western blot//qRT-PCR	Functional MTI	24402783
	hsa-miR-134-5p	Homo sapiens	OPRM1	Immunoblot//Immunohistochemistry//In situ hybridization//Luciferase reporter assay//qRT-PCR	Functional MTI	22865422
	hsa-miR-429	Homo sapiens	OSTF1	Luciferase reporter assay	Functional MTI	22940129
	hsa-miR-140-5p	Homo sapiens	OSTM1	Luciferase reporter assay	Functional MTI	23389033
	hsa-miR-21-5p	Homo sapiens	OXTR	Luciferase reporter assay	Functional MTI	26273428
	hsa-miR-122-5p	Homo sapiens	P4HA1	Luciferase reporter assay	Functional MTI	23178710
	hsa-miR-7-5p	Homo sapiens	PAK1	Luciferase reporter assay//Western blot	Functional MTI	18922890
	hsa-miR-134-5p	Homo sapiens	PAK2	Luciferase reporter assay//qRT-PCR//Western blot	Functional MTI	26363097
	hsa-miR-145-5p	Homo sapiens	PAK4	Luciferase reporter assay//qRT-PCR//Western blot	Functional MTI	22766504
	hsa-miR-155-5p	Homo sapiens	PALD1	Reporter assay;Other	Functional MTI	20584899
	hsa-miR-335-5p	Homo sapiens	PARP1	Luciferase reporter assay//qRT-PCR//Western blot	Functional MTI	27871924
	hsa-miR-145-5p	Homo sapiens	PARP8	Luciferase reporter assay	Functional MTI	15131085
	hsa-miR-10b-5p	Homo sapiens	PAX6	Luciferase reporter assay	Functional MTI	23034333
	hsa-miR-155-5p	Homo sapiens	PBRM1	Reporter assay;Other	Non-Functional MTI	20584899
	hsa-miR-21-5p	Homo sapiens	PCBP1	Luciferase reporter assay	Functional MTI	22316494
	hsa-miR-182-5p	Homo sapiens	PCDH8	Luciferase reporter assay	Functional MTI	27246830
	hsa-miR-155-5p	Homo sapiens	PCDH9	Reporter assay;Other	Functional MTI	20584899
	hsa-miR-183-5p	Homo sapiens	PCLAF	Luciferase reporter assay//Microarray//qRT-PCR	Functional MTI	26322309
	hsa-miR-125b-5p	Homo sapiens	PCTP	Luciferase reporter assay//Microarray//qRT-PCR//Western blot	Functional MTI	22723551
	hsa-miR-182-5p	Homo sapiens	PDCD4	Luciferase reporter assay//qRT-PCR//Western blot	Functional MTI	23296900
	hsa-miR-211-5p	Homo sapiens	PDE3A	Luciferase reporter assay//Microarray//qRT-PCR//Western blot	Functional MTI	24039954
	hsa-let-7b-5p	Homo sapiens	PDGFRA	Luciferase reporter assay//Microarray//qRT-PCR	Non-Functional MTI	22995917
	hsa-miR-29a-3p	Homo sapiens	PDGFRB	Luciferase reporter assay	Functional MTI	22745231
	hsa-miR-375	Homo sapiens	PDK1	Immunohistochemistry//Luciferase reporter assay//qRT-PCR//Western blot	Functional MTI	21533613
	hsa-miR-122-5p	Homo sapiens	PDK4	Luciferase reporter assay//qRT-PCR//Western blot	Functional MTI	26506419
	hsa-miR-27a-5p	Homo sapiens	PEBP1	Luciferase reporter assay//qRT-PCR//Western blot	Functional MTI	25128483
	hsa-miR-15b-5p	Homo sapiens	PEBP4	Luciferase reporter assay//qRT-PCR//Western blot	Functional MTI	25721211
	hsa-miR-122-5p	Homo sapiens	PEG10	Luciferase reporter assay	Functional MTI	27370270
	hsa-miR-29a-3p	Homo sapiens	PER1	Luciferase reporter assay//qRT-PCR//Western blot	Functional MTI	24578160
	hsa-miR-520e	Homo sapiens	PFKP	Luciferase reporter assay//qRT-PCR//Western blot	Functional MTI	23389994
	hsa-miR-182-5p	Homo sapiens	PFN1	Luciferase reporter assay	Functional MTI	23430586
	hsa-miR-26a-5p	Homo sapiens	PHB	Luciferase reporter assay//qRT-PCR//Western blot	Functional MTI	23870455
	hsa-miR-155-5p	Homo sapiens	PHC2	Reporter assay;Other	Functional MTI	20584899
	hsa-miR-155-5p	Homo sapiens	PHF14	Reporter assay;Other	Functional MTI	20584899
	hsa-miR-125b-5p	Homo sapiens	PHF8	Luciferase reporter assay	Functional MTI	26309412
	hsa-miR-15a-5p	Homo sapiens	PHLPP1	Luciferase reporter assay//Northern blot//qRT-PCR//Western blot	Functional MTI	24337069
	hsa-miR-205-5p	Homo sapiens	PHLPP2	ChIP-seq//ELISA//Immunohistochemistry//Luciferase reporter assay//qRT-PCR//Western blot	Functional MTI	23856247
	hsa-miR-424-5p	Homo sapiens	PIAS1	Luciferase reporter assay	Non-Functional MTI	20065103
	hsa-miR-125b-5p	Homo sapiens	PIAS3	Luciferase reporter assay//Western blot	Functional MTI	23857508
	hsa-miR-155-5p	Homo sapiens	PICALM	Reporter assay;Other	Functional MTI	20584899
	hsa-miR-10b-5p	Homo sapiens	PIEZO1	Luciferase reporter assay	Functional MTI	22322955
	hsa-miR-125b-5p	Homo sapiens	PIGF	Luciferase reporter assay//qRT-PCR//Western blot	Functional MTI	21703189
	hsa-miR-26a-5p	Homo sapiens	PIK3C2A	Luciferase reporter assay	Functional MTI	24194905
	hsa-miR-10b-5p	Homo sapiens	PIK3CA	Luciferase reporter assay//Western blot	Functional MTI	25896413
	hsa-miR-125b-5p	Homo sapiens	PIK3CD	Luciferase reporter assay//qRT-PCR//Western blot	Functional MTI	23160634
	hsa-miR-10a-5p	Homo sapiens	PIK3CG	Luciferase reporter assay//qRT-PCR//Western blot	Functional MTI	24522205
	hsa-miR-155-5p	Homo sapiens	PIK3R1	Luciferase reporter assay//qRT-PCR//Western blot	Functional MTI	22609116
	hsa-miR-7-5p	Homo sapiens	PIK3R3	ELISA//Luciferase reporter assay//qRT-PCR//Western blot	Functional MTI	23135998
	hsa-miR-16-5p	Homo sapiens	PIM1	Luciferase reporter assay	Functional MTI	22970245
	hsa-miR-140-5p	Homo sapiens	PIN1	Luciferase reporter assay//qRT-PCR//Western blot	Functional MTI	26150353
	hsa-miR-133b	Homo sapiens	PITX3	FACS//Luciferase reporter assay	Functional MTI	17761882
	hsa-miR-155-5p	Homo sapiens	PKIA	ChIP-seq//Immunoblot//Luciferase reporter assay//qRT-PCR	Functional MTI	22473996
	hsa-miR-338-3p	Homo sapiens	PKLR	Luciferase reporter assay//Microarray//qRT-PCR//Western blot	Functional MTI	26082033
	hsa-miR-122-5p	Homo sapiens	PKM	Luciferase reporter assay//qRT-PCR//Western blot	Functional MTI	24466275
	hsa-miR-155-5p	Homo sapiens	PKN2	Reporter assay;Other	Functional MTI	20584899
	hsa-miR-338-3p	Homo sapiens	PLA2G4B	Immunoblot//Immunocytochemistry//Luciferase reporter assay//Microarray//qRT-PCR	Functional MTI	18991333
	hsa-miR-26a-5p	Homo sapiens	PLAG1	Luciferase reporter assay//Microarray//Reporter assay;Other	Functional MTI	16461460
	hsa-miR-21-5p	Homo sapiens	PLAT	Luciferase reporter assay//Microarray//qRT-PCR	Functional MTI	21131358
	hsa-miR-193a-3p	Homo sapiens	PLAU	Luciferase reporter assay//Microarray//qRT-PCR//Western blot	Functional MTI	27307030
	hsa-miR-100-5p	Homo sapiens	PLK1	Luciferase reporter assay//qRT-PCR	Functional MTI	19739117
	hsa-miR-26a-5p	Homo sapiens	PLOD2	Luciferase reporter assay	Functional MTI	26983694
	hsa-miR-21-5p	Homo sapiens	PLOD3	Luciferase reporter assay//Quantitative proteomic approach	Functional MTI	19253296
	hsa-miR-155-5p	Homo sapiens	PLS1	Reporter assay;Other	Non-Functional MTI	20584899
	hsa-miR-125b-5p	Homo sapiens	PODXL	Luciferase reporter assay	Functional MTI	25738314
	hsa-miR-155-5p	Homo sapiens	POLE3	Reporter assay;Other	Non-Functional MTI	20584899
	hsa-miR-211-5p	Homo sapiens	POU3F2	Luciferase reporter assay//Western blot	Functional MTI	21435193
	hsa-miR-145-5p	Homo sapiens	POU5F1	FACS//Flow//GFP reporter assay//In situ hybridization//Luciferase reporter assay//qRT-PCR//Reporter assay;Western blot;qRT-PCR	Functional MTI	19409607
	hsa-miR-10b-5p	Homo sapiens	PPARA	Luciferase reporter assay//qRT-PCR//Western blot	Functional MTI	19780876
	hsa-miR-21-5p	Homo sapiens	PPIF	Luciferase reporter assay//qRT-PCR	Functional MTI	18829576
	hsa-miR-145-5p	Homo sapiens	PPM1D	Immunoblot//Luciferase reporter assay	Non-Functional MTI	20668064
	hsa-miR-149-5p	Homo sapiens	PPM1F	Luciferase reporter assay//Western blot	Functional MTI	26498692
	hsa-miR-22-3p	Homo sapiens	PPM1K	Luciferase reporter assay//qRT-PCR//Western blot	Functional MTI	26592513
	hsa-miR-125b-5p	Homo sapiens	PPP1CA	Luciferase reporter assay//qRT-PCR//Western blot	Functional MTI	21935352
	hsa-miR-34a-5p	Homo sapiens	PPP1CC	Luciferase reporter assay//qRT-PCR//Western blot	Functional MTI	26111201
	hsa-miR-34a-5p	Homo sapiens	PPP1R10	Luciferase reporter assay	Functional MTI	23426265
	hsa-miR-29a-3p	Homo sapiens	PPP1R13B	Luciferase reporter assay//Western blot	Functional MTI	19079265
	hsa-miR-183-5p	Homo sapiens	PPP2CB	Luciferase reporter assay//Western blot//qRT-PCR	Functional MTI	25152390
	hsa-miR-556-5p	Homo sapiens	PPP2R2A	Luciferase reporter assay//Western blot	Functional MTI	26297546
	hsa-miR-133b	Homo sapiens	PPP2R2D	Luciferase reporter assay//Quantitative proteomic approach	Functional MTI	27074866
	hsa-miR-135b-5p	Homo sapiens	PPP2R5C	Luciferase reporter assay//qRT-PCR//Western blot	Functional MTI	23594704
	hsa-miR-145-5p	Homo sapiens	PPP3CA	qRT-PCR//Luciferase reporter assay//Microarray//Reporter assay;Other	Functional MTI	19915607
	hsa-miR-193a-3p	Homo sapiens	PRAP1	Luciferase reporter assay	Functional MTI	21779487
	hsa-let-7b-5p	Homo sapiens	PRDM1	Immunohistochemistry//Luciferase reporter assay//qRT-PCR//Western blot	Functional MTI	20651244
	hsa-miR-133b	Homo sapiens	PRDM16	Luciferase reporter assay	Functional MTI	23395168
	hsa-miR-16-5p	Homo sapiens	PRDM4	Luciferase reporter assay//Western blot//Microarray//qRT-PCR	Functional MTI	23941513
	hsa-miR-26a-5p	Homo sapiens	PRDX3	Luciferase reporter assay	Functional MTI	24828865
	hsa-miR-338-3p	Homo sapiens	PREX2	Immunohistochemistry//Luciferase reporter assay//qRT-PCR//Western blot	Functional MTI	24375644
	hsa-miR-137	Homo sapiens	PRKAA1	Luciferase reporter assay//qRT-PCR//Western blot	Functional MTI	27497953
	hsa-miR-122-5p	Homo sapiens	PRKAB1	Luciferase reporter assay	Functional MTI	16459310
	hsa-miR-155-5p	Homo sapiens	PRKAR1A	Reporter assay;Other	Functional MTI	20584899
	hsa-miR-26a-5p	Homo sapiens	PRKCD	Luciferase reporter assay//Western blot	Functional MTI	23525216
	hsa-miR-146a-5p	Homo sapiens	PRKCE	Luciferase reporter assay	Functional MTI	23457043
	hsa-miR-34a-5p	Homo sapiens	PRKD1	Luciferase reporter assay//qRT-PCR//Western blot	Functional MTI	26895471
	hsa-miR-101-5p	Homo sapiens	PRKDC	Luciferase reporter assay//qRT-PCR	Functional MTI	20617180
	hsa-miR-122-5p	Homo sapiens	PRKRA	Luciferase reporter assay//Microarray//qRT-PCR//Western blot	Functional MTI	21937511
	hsa-miR-142-3p	Homo sapiens	PROM1	Reporter assay	Functional MTI	21394831
	hsa-miR-192-5p	Homo sapiens	PRPF38A	Luciferase reporter assay//qRT-PCR//Reporter assay;Microarray;Other	Functional MTI	19074876
	hsa-miR-106b-5p	Homo sapiens	PRRX1	Luciferase reporter assay//Western blot	Functional MTI	26617763
	hsa-miR-155-5p	Homo sapiens	PSIP1	Flow//Luciferase reporter assay//Microarray//qRT-PCR//Western blot	Functional MTI	23028330
	hsa-miR-7-5p	Homo sapiens	PSME3	GFP reporter assay	Functional MTI	23762407
	hsa-miR-133b	Homo sapiens	PTBP1	Luciferase reporter assay//qRT-PCR//Western blot	Functional MTI	26980745
	hsa-miR-133b	Homo sapiens	PTBP2	Reporter assay	Functional MTI	17210790
	hsa-miR-424-5p	Homo sapiens	PTCH1	Luciferase reporter assay	Functional MTI	24967963
	hsa-miR-106b-5p	Homo sapiens	PTEN	Luciferase reporter assay	Functional MTI	21283765
	hsa-miR-106b-5p	Homo sapiens	PTENP1	Luciferase reporter assay//qRT-PCR	Functional MTI	28212532
	hsa-miR-149-5p	Homo sapiens	PTGER2	ELISA//Luciferase reporter assay//qRT-PCR//Western blot	Functional MTI	25916550
	hsa-miR-146a-5p	Homo sapiens	PTGES2	Luciferase reporter assay	Functional MTI	23589616
	hsa-miR-137	Homo sapiens	PTGS2	Luciferase reporter assay//Western blot	Functional MTI	22406049
	hsa-miR-125b-5p	Homo sapiens	PTH1R	Luciferase reporter assay//qRT-PCR//Western blot	Functional MTI	26351562
	hsa-miR-193a-3p	Homo sapiens	PTK2	Luciferase reporter assay//qRT-PCR//Western blot	Non-Functional MTI	18381414
	hsa-miR-22-3p	Homo sapiens	PTMS	Luciferase reporter assay//Microarray//Northern blot//qRT-PCR//Western blot	Functional MTI	22493679
	hsa-miR-145-5p	Homo sapiens	PTP4A2	Reporter assay;Microarray	Functional MTI	21351259
	hsa-miR-183-5p	Homo sapiens	PTPA	Luciferase reporter assay//Western blot//qRT-PCR	Functional MTI	25152390
	hsa-miR-122-5p	Homo sapiens	PTPN1	Luciferase reporter assay	Functional MTI	22807119
	hsa-miR-26a-5p	Homo sapiens	PTPN13	Luciferase reporter assay//qRT-PCR//Western blot	Functional MTI	27285768
	hsa-miR-21-5p	Homo sapiens	PTPN14	Immunohistochemistry//Luciferase reporter assay//qRT-PCR//Western blot	Functional MTI	25803229
	hsa-miR-142-3p	Homo sapiens	PTPN23	Luciferase reporter assay//qRT-PCR//Western blot	Functional MTI	23843459
	hsa-miR-126-5p	Homo sapiens	PTPN7	Flow//Immunoprecipitaion//Luciferase reporter assay//qRT-PCR//Western blot	Functional MTI	21163928
	hsa-miR-96-5p	Homo sapiens	PTPN9	Luciferase reporter assay//qRT-PCR//Western blot//Immunohistochemistry	Functional MTI	27857177
	hsa-miR-200a-3p	Homo sapiens	PTPRD	Reporter assay	Functional MTI	20005803
	hsa-miR-133b	Homo sapiens	PTPRK	Luciferase reporter assay	Functional MTI	23451058
	hsa-miR-205-5p	Homo sapiens	PTPRM	Immunohistochemistry//Luciferase reporter assay//Microarray//QRTPCR	Functional MTI	23497265
	hsa-miR-335-5p	Homo sapiens	PTPRN2	Luciferase reporter assay//Microarray//Microarray;Other	Functional MTI	18185580
	hsa-miR-21-5p	Homo sapiens	PTX3	Luciferase reporter assay	Non-Functional MTI	21131358
	hsa-miR-134-5p	Homo sapiens	PUM2	Immunofluorescence//Luciferase reporter assay//qRT-PCR//Western blot	Functional MTI	25097251
	hsa-miR-106b-5p	Homo sapiens	PURA	Luciferase reporter assay	Functional MTI	22835829
	hsa-miR-29a-3p	Homo sapiens	PXDN	Luciferase reporter assay//Western blot	Functional MTI	20566844
	hsa-miR-137	Homo sapiens	PXN	Luciferase reporter assay//qRT-PCR//Western blot	Functional MTI	23275153
	hsa-miR-122-5p	Homo sapiens	RAB11FIP1	Luciferase reporter assay//qRT-PCR	Functional MTI	19296470
	hsa-miR-155-5p	Homo sapiens	RAB11FIP2	Reporter assay;Other	Functional MTI	20584899
	hsa-miR-223-5p	Homo sapiens	RAB12	Luciferase reporter assay//qRT-PCR//Western blot	Functional MTI	26456833
	hsa-miR-27b-5p	Homo sapiens	RAB14	Luciferase reporter assay//Western blot	Functional MTI	26473412
	hsa-miR-101-5p	Homo sapiens	RAB1A	Luciferase reporter assay//qRT-PCR//Western blot	Functional MTI	25850725
	hsa-miR-204-5p	Homo sapiens	RAB22A	Luciferase reporter assay//Microarray//qRT-PCR	Functional MTI	21282569
	hsa-miR-134-5p	Homo sapiens	RAB27A	Luciferase reporter assay	Functional MTI	28043921
	hsa-miR-193a-3p	Homo sapiens	RAB27B	Luciferase reporter assay	Functional MTI	26913720
	hsa-miR-204-5p	Homo sapiens	RAB40B	Luciferase reporter assay//Microarray//qRT-PCR	Functional MTI	21282569
	hsa-miR-451a	Homo sapiens	RAB5A	Luciferase reporter assay//qRT-PCR//Western blot//Flow	Functional MTI	24574214
	hsa-miR-22-3p	Homo sapiens	RAB5B	Chromatin immunoprecipitation//FACS//Immunohistochemistry//Luciferase reporter assay//Microarray//Next Generation Sequencing (NGS)//Northern blot//qRT-PCR//Western blot	Functional MTI	27569217
	hsa-miR-122-5p	Homo sapiens	RAB6B	Luciferase reporter assay//qRT-PCR	Functional MTI	19296470
	hsa-miR-101-5p	Homo sapiens	RAC1	Luciferase reporter assay//qRT-PCR//Western blot	Functional MTI	26697839
	hsa-miR-192-5p	Homo sapiens	RACGAP1	Luciferase reporter assay//qRT-PCR//Microarray//Reporter assay;Microarray;Other	Functional MTI	19074876
	hsa-miR-182-5p	Homo sapiens	RAD17	Luciferase reporter assay	Functional MTI	23249749
	hsa-miR-155-5p	Homo sapiens	RAD51	Flow//Immunofluorescence//Immunohistochemistry//Luciferase reporter assay//qRT-PCR//Western blot	Functional MTI	24616504
	hsa-miR-125a-5p	Homo sapiens	RAF1	Luciferase reporter assay//qRT-PCR//Western blot	Functional MTI	27982429
	hsa-miR-140-5p	Homo sapiens	RALA	Luciferase reporter assay	Functional MTI	24063364
	hsa-miR-29a-3p	Homo sapiens	RAN	flow//qRT-PCR//GFP reporter assay	Non-Functional MTI	19818597
	hsa-miR-100-5p	Homo sapiens	RAP1B	Luciferase reporter assay//qRT-PCR//Western blot	Functional MTI	24626817
	hsa-miR-155-5p	Homo sapiens	RAPGEF2	Reporter assay;Other	Functional MTI	20584899
	hsa-miR-146a-5p	Homo sapiens	RARB	Luciferase reporter assay//qRT-PCR//Western blot	Functional MTI	27011326
	hsa-miR-182-5p	Homo sapiens	RARG	Luciferase reporter assay//Western blot	Functional MTI	19782699
	hsa-miR-21-5p	Homo sapiens	RASA1	Luciferase reporter assay//Western blot	Non-Functional MTI	18372920
	hsa-miR-375	Homo sapiens	RASD1	Luciferase reporter assay//Microarray//qRT-PCR	Functional MTI	20978187
	hsa-miR-137	Homo sapiens	RASGRF1	Luciferase reporter assay//qRT-PCR//Western blot	Functional MTI	26440052
	hsa-miR-21-5p	Homo sapiens	RASGRP1	qRT-PCR//Luciferase reporter assay//Western blot	Functional MTI	20483747
	hsa-miR-200a-3p	Homo sapiens	RASSF2	Reporter assay	Functional MTI	20005803
	hsa-miR-214-5p	Homo sapiens	RASSF5	Luciferase reporter assay//qRT-PCR//Western blot	Functional MTI	28290615
	hsa-miR-429	Homo sapiens	RASSF8	Luciferase reporter assay//Western blot	Functional MTI	24866238
	hsa-miR-99a-5p	Homo sapiens	RAVER2	Immunoprecipitaion//Luciferase reporter assay//Western blot	Functional MTI	17637574
	hsa-miR-106b-5p	Homo sapiens	RB1	Luciferase reporter assay	Functional MTI	21283765
	hsa-miR-133b	Homo sapiens	RB1CC1	Luciferase reporter assay	Functional MTI	23451058
	hsa-miR-155-5p	Homo sapiens	RBAK	Reporter assay;Other	Non-Functional MTI	20584899
	hsa-miR-429	Homo sapiens	RBBP4	ChIP-seq//Flow//Immunohistochemistry//In situ hybridization//Luciferase reporter assay//Microarray//qRT-PCR//Western blot	Functional MTI	24572141
	hsa-miR-106b-5p	Homo sapiens	RBL1	Luciferase reporter assay	Functional MTI	21283765
	hsa-miR-106b-5p	Homo sapiens	RBL2	Luciferase reporter assay	Functional MTI	21283765
	hsa-miR-34a-5p	Homo sapiens	RBP2	Luciferase reporter assay	Functional MTI	27453008
	hsa-miR-34a-5p	Homo sapiens	RCAN1	Immunohistochemistry//Luciferase reporter assay//qRT-PCR//Western blot	Functional MTI	28292468
	hsa-miR-26a-5p	Homo sapiens	RCBTB1	Luciferase reporter assay//Western blot//qRT-PCR	Functional MTI	23689287
	hsa-miR-22-3p	Homo sapiens	RCOR1	Luciferase reporter assay	Functional MTI	23349832
	hsa-let-7b-5p	Homo sapiens	RDH10	pSILAC//Luciferase reporter assay//Proteomics;Other	Functional MTI	18668040
	hsa-miR-135b-5p	Homo sapiens	RECK	Western blot//Luciferase reporter assay	Functional MTI	25537516
	hsa-miR-7-5p	Homo sapiens	REL	Luciferase reporter assay//qRT-PCR//Western blot	Functional MTI	27203220
	hsa-miR-7-5p	Homo sapiens	RELA	ChIP-seq//Immunofluorescence//Immunohistochemistry//In situ hybridization//Luciferase reporter assay//Northern blot//qRT-PCR//Western blot	Functional MTI	26261179
	hsa-miR-15a-5p	Homo sapiens	REPIN1	Luciferase reporter assay//Western//qRT-PCR	Functional MTI	24285725
	hsa-miR-429	Homo sapiens	RERE	Luciferase reporter assay	Functional MTI	17923093
	hsa-miR-21-5p	Homo sapiens	REST	Luciferase reporter assay	Functional MTI	19242418
	hsa-miR-15a-5p	Homo sapiens	RET	Flow//Luciferase reporter assay	Functional MTI	23022987
	hsa-miR-96-5p	Homo sapiens	REV1	Immunofluorescence//Luciferase reporter assay//qRT-PCR//Western blot	Functional MTI	22761336
	hsa-miR-22-3p	Homo sapiens	RGS2	Luciferase reporter assay//Microarray	Functional MTI	21168126
	hsa-miR-7-5p	Homo sapiens	RGS5	Luciferase reporter assay	Functional MTI	25810883
	hsa-miR-155-5p	Homo sapiens	RHEB	Reporter assay;Other	Non-Functional MTI	20584899
	hsa-miR-146a-5p	Homo sapiens	RHO	Luciferase reporter assay	Functional MTI	25515214
	hsa-miR-16-5p	Homo sapiens	RICTOR	Luciferase reporter assay	Functional MTI	25311506
	hsa-miR-200a-3p	Homo sapiens	RIN2	Reporter assay	Functional MTI	20005803
	hsa-miR-29a-3p	Homo sapiens	RNASEL	Immunoblot//Luciferase reporter assay//qRT-PCR//Western blot	Functional MTI	23113544
	hsa-miR-146a-5p	Homo sapiens	RNF11	Luciferase reporter assay	Functional MTI	23345523
	hsa-miR-155-5p	Homo sapiens	RNF123	ELISA//Luciferase reporter assay//qRT-PCR//Western blot	Functional MTI	21355095
	hsa-miR-100-5p	Homo sapiens	RNF144B	Immunohistochemistry//Luciferase reporter assay//qRT-PCR//Western blot	Functional MTI	27524417
	hsa-miR-7-5p	Homo sapiens	RNF183	Luciferase reporter assay//qRT-PCR//Western blot//Immunofluorescence//Immunohistochemistry	Functional MTI	26818663
	hsa-miR-29a-3p	Homo sapiens	ROBO1	Luciferase reporter assay//qRT-PCR//Western blot	Functional MTI	25997819
	hsa-miR-145-5p	Homo sapiens	ROBO2	In situ hybridization//Luciferase reporter assay//qRT-PCR//western blot//Reporter assay	Functional MTI	21276775
	hsa-miR-145-5p	Homo sapiens	ROCK1	Luciferase reporter assay//Western blot	Functional MTI	24573110
	hsa-miR-142-3p	Homo sapiens	ROCK2	Luciferase reporter assay//qRT-PCR//Western blot	Functional MTI	24743945
	hsa-miR-137	Homo sapiens	RORA	Luciferase reporter assay	Functional MTI	24500708
	hsa-miR-145-5p	Homo sapiens	RPA1	Luciferase reporter assay	Functional MTI	25354783
	hsa-let-7b-5p	Homo sapiens	RPIA	Luciferase reporter assay//Reporter assay;Other	Non-Functional MTI	15131085
	hsa-miR-125b-5p	Homo sapiens	RPS6KA1	Luciferase reporter assay//ELISA//GFP reporter assay//Immunoblot//Immunoprecipitaion//qRT-PCR//Western blot	Functional MTI	21643012
	hsa-miR-191-5p	Homo sapiens	RPS6KA3	Flow//Luciferase reporter assay//Microarray//Next Generation Sequencing (NGS)//qRT-PCR//Western blot	Functional MTI	25992613
	hsa-miR-93-5p	Homo sapiens	RPS6KA4	Luciferase reporter assay//Next Generation Sequencing (NGS)//qRT-PCR//Western blot	Functional MTI	27350436
	hsa-miR-145-5p	Homo sapiens	RPS6KB1	Luciferase reporter assay	Functional MTI	24157791
	hsa-miR-193a-3p	Homo sapiens	RPS6KB2	Luciferase reporter assay//qRT-PCR//Western blot	Functional MTI	24469061
	hsa-miR-155-5p	Homo sapiens	RPTOR	Luciferase reporter assay//Western blot	Functional MTI	27284727
	hsa-miR-145-5p	Homo sapiens	RREB1	Immunohistochemistry//Luciferase reporter assay//qRT-PCR//Western blot	Functional MTI	22751122
	hsa-miR-10b-5p	Homo sapiens	RSRC1	Luciferase reporter assay	Functional MTI	26881967
	hsa-miR-145-5p	Homo sapiens	RTKN	Reporter assay;Western blot;qRT-PCR;Other	Functional MTI	19360360
	hsa-miR-21-5p	Homo sapiens	RTN4	Luciferase reporter assay//Quantitative proteomic approach	Functional MTI	19253296
	hsa-miR-18a-5p	Homo sapiens	RUNX1	Luciferase reporter assay//qRT-PCR//Western blot//	Functional MTI	25452107
	hsa-miR-155-5p	Homo sapiens	RUNX2	Luciferase reporter assay//qRT-PCR//Western blot	Functional MTI	20427544
	hsa-miR-106b-5p	Homo sapiens	RUNX3	Luciferase reporter assay//qRT-PCR//Western blot	Functional MTI	23912048
	hsa-miR-29a-3p	Homo sapiens	S100B	Luciferase reporter assay//qRT-PCR//Northern blot	Functional MTI	19102781
	hsa-miR-155-5p	Homo sapiens	SAMHD1	Flow//Luciferase reporter assay//qRT-PCR//Western blot	Functional MTI	25890101
	hsa-miR-155-5p	Homo sapiens	SAP30L	Reporter assay;Other	Functional MTI	20584899
	hsa-miR-29a-3p	Homo sapiens	SAPCD2	Luciferase reporter assay//qRT-PCR//Western blot	Functional MTI	21998710
	hsa-miR-10b-5p	Homo sapiens	SART3	Luciferase reporter assay	Functional MTI	26881967
	hsa-miR-191-5p	Homo sapiens	SATB1	Luciferase reporter assay//qRT-PCR//Western blot	Functional MTI	22683624
	hsa-miR-182-5p	Homo sapiens	SATB2	Luciferase reporter assay//QRTPCR//Western blot	Functional MTI	24884732
	hsa-miR-96-5p	Homo sapiens	SCARB1	Luciferase reporter assay	Functional MTI	23459944
	hsa-miR-192-5p	Homo sapiens	SCN5A	Luciferase reporter assay//qRT-PCR//Western blot	Functional MTI	26209011
	hsa-miR-125b-5p	Homo sapiens	SCNN1A	Luciferase reporter assay//qRT-PCR//Western blot	Functional MTI	25173609
	hsa-miR-10b-5p	Homo sapiens	SDC1	Luciferase reporter assay	Functional MTI	22573479
	hsa-miR-18a-5p	Homo sapiens	SDC4	Luciferase reporter assay//qRT-PCR	Functional MTI	25089138
	hsa-miR-155-5p	Homo sapiens	SDCBP	Reporter assay;Other	Non-Functional MTI	20584899
	hsa-miR-155-5p	Homo sapiens	SECISBP2	Reporter assay;Other	Functional MTI	20584899
	hsa-miR-155-5p	Homo sapiens	SEL1L	Luciferase reporter assay//qRT-PCR//Western blot	Functional MTI	23661430
	hsa-miR-155-5p	Homo sapiens	SELE	Luciferase reporter assay	Non-Functional MTI	19949084
	hsa-miR-193a-3p	Homo sapiens	SELENON	Luciferase reporter assay//Microarray//qRT-PCR//Western blot	Functional MTI	27307030
	hsa-miR-125b-5p	Homo sapiens	SEMA4C	Luciferase reporter assay//qRT-PCR//Western blot	Functional MTI	25605244
	hsa-miR-145-5p	Homo sapiens	SENP1	qRT-PCR//Luciferase reporter assay//Western blot	Functional MTI	25645686
	hsa-miR-192-5p	Homo sapiens	SEPT10	Luciferase reporter assay//qRT-PCR//Microarray//Reporter assay;Microarray;Other	Functional MTI	19074876
	hsa-miR-140-5p	Homo sapiens	SEPT2	Luciferase reporter assay//qRT-PCR//Western blot	Functional MTI	27155525
	hsa-miR-200a-3p	Homo sapiens	SEPT7	Reporter assay	Functional MTI	20005803
	hsa-miR-26a-5p	Homo sapiens	SERBP1	Immunoprecipitaion//Luciferase reporter assay//Western blot	Functional MTI	17637574
	hsa-miR-204-5p	Homo sapiens	SERINC3	Luciferase reporter assay//Microarray//qRT-PCR	Functional MTI	21282569
	hsa-miR-145-5p	Homo sapiens	SERINC5	Reporter assay;Microarray	Functional MTI	21351259
	hsa-miR-204-5p	Homo sapiens	SERP1	Luciferase reporter assay//Microarray//qRT-PCR//Western blot	Functional MTI	21282569
	hsa-miR-137	Homo sapiens	SERPINA3	Luciferase reporter assay	Functional MTI	23640964
	hsa-miR-21-5p	Homo sapiens	SERPINB5	Luciferase reporter assay//Western blot	Functional MTI	18270520
	hsa-miR-29a-3p	Homo sapiens	SERPINB9	Luciferase reporter assay//Microarray//Northern blot//qRT-PCR//Western blot	Functional MTI	21880628
	hsa-miR-10a-5p	Homo sapiens	SERPINE1	qRT-PCR//ELISA//Luciferase reporter assay//Western blot	Functional MTI	25554417
	hsa-miR-29a-3p	Homo sapiens	SERPINH1	Luciferase reporter assay//qRT-PCR//Western blot	Functional MTI	24141696
	hsa-miR-21-5p	Homo sapiens	SERPINI1	Flow//Immunohistochemistry//Luciferase reporter assay//Microarray//qRT-PCR//Western blot	Functional MTI	22464652
	hsa-miR-125b-5p	Homo sapiens	SET	Luciferase reporter assay//qRT-PCR//Western blot	Functional MTI	27383536
	hsa-miR-106b-5p	Homo sapiens	SETD2	ChIP-seq//Immunocytochemistry//Luciferase reporter assay//qRT-PCR//Western blot	Functional MTI	25714014
	hsa-miR-29a-3p	Homo sapiens	SETDB1	ChIP-seq//Immunohistochemistry//Luciferase reporter assay//Next Generation Sequencing (NGS)//qRT-PCR//Western blot	Functional MTI	26481868
	hsa-miR-27a-5p	Homo sapiens	SFRP1	Luciferase reporter assay//qRT-PCR//Western blot	Functional MTI	24625818
	hsa-miR-29a-3p	Homo sapiens	SFRP2	Luciferase reporter assay//qRT-PCR//Western blot	Functional MTI	20551325
	hsa-miR-125b-5p	Homo sapiens	SFRP5	Luciferase reporter assay	Functional MTI	27592695
	hsa-miR-133b	Homo sapiens	SGK1	Luciferase reporter assay//qRT-PCR//Western blot	Functional MTI	26840046
	hsa-miR-125b-5p	Homo sapiens	SGPL1	Luciferase reporter assay	Functional MTI	19635812
	hsa-miR-155-5p	Homo sapiens	SH3PXD2A	Luciferase reporter assay//qRT-PCR	Functional MTI	22797699
	hsa-miR-155-5p	Homo sapiens	SHANK2	Luciferase reporter assay//qRT-PCR	Functional MTI	22797699
	hsa-miR-200a-3p	Homo sapiens	SHC1	Reporter assay	Functional MTI	20005803
	hsa-miR-424-5p	Homo sapiens	SIAH1	Immunohistochemistry//Luciferase reporter assay//Northern blot//qRT-PCR//Western blot	Functional MTI	21062812
	hsa-miR-335-5p	Homo sapiens	SIAH2	Luciferase reporter assay//Microarray//qRT-PCR//Western blot	Functional MTI	25997740
	hsa-miR-205-5p	Homo sapiens	SIGMAR1	Luciferase reporter assay	Non-Functional MTI	20065103
	hsa-miR-146a-5p	Homo sapiens	SIKE1	Luciferase reporter assay//qRT-PCR//Microarray	Functional MTI	23963696
	hsa-miR-133b	Homo sapiens	SIRT1	Luciferase reporter assay	Functional MTI	27166997
	hsa-miR-7-5p	Homo sapiens	SIRT2	Luciferase reporter assay	Functional MTI	27158385
	hsa-miR-125a-5p	Homo sapiens	SIRT7	Flow//Immunoblot//Luciferase reporter assay//Microarray//Northern blot//qRT-PCR//Western blot	Functional MTI	23079745
	hsa-miR-204-5p	Homo sapiens	SIX1	Luciferase reporter assay//Western blot	Functional MTI	25157435
	hsa-miR-155-5p	Homo sapiens	SKI	Immunohistochemistry//Luciferase reporter assay//Northern blot//qRT-PCR//Western blot	Functional MTI	21062812
	hsa-miR-7-5p	Homo sapiens	SKP2	GFP reporter assay	Functional MTI	23762407
	hsa-miR-191-5p	Homo sapiens	SLC16A2	Immunoprecipitation//In situ hybridization//Luciferase assay//Microarray//Northern blot//QRTPCR//Western blot	Functional MTI	23505378
	hsa-miR-96-5p	Homo sapiens	SLC1A1	Immunohistochemistry//Luciferase reporter assay//qRT-PCR	Functional MTI	24304186
	hsa-miR-29a-3p	Homo sapiens	SLC22A7	EMSA//Luciferase reporter assay//qRT-PCR//Western blot	Functional MTI	26428001
	hsa-miR-22-3p	Homo sapiens	SLC2A1	qRT-PCR//Luciferase reporter assay//In situ hybridization//Western blot	Functional MTI	25304371
	hsa-miR-106b-5p	Homo sapiens	SLC2A4	LacZ reporter assay	Functional MTI	27165190
	hsa-miR-155-5p	Homo sapiens	SLC33A1	Reporter assay;Other	Non-Functional MTI	20584899
	hsa-miR-155-5p	Homo sapiens	SLC35F2	Reporter assay;Other	Non-Functional MTI	20584899
	hsa-miR-126-5p	Homo sapiens	SLC45A3	Western blot//Luciferase reporter assay//Reporter assay;Other	Functional MTI	18193184
	hsa-miR-137	Homo sapiens	SLC6A3	GFP reporter assay//Luciferase reporter assay//qRT-PCR//Western blot	Functional MTI	27628529
	hsa-miR-96-5p	Homo sapiens	SLC6A6	Immunohistochemistry//Luciferase reporter assay//qRT-PCR	Functional MTI	24304186
	hsa-miR-122-5p	Homo sapiens	SLC7A1	Luciferase reporter assay//Western blot//Reporter assay;Other	Functional MTI	17179747
	hsa-miR-122-5p	Homo sapiens	SLC7A11	Luciferase reporter assay//qRT-PCR	Functional MTI	19296470
	hsa-miR-193a-3p	Homo sapiens	SLC7A5	Immunoflourescence//Luciferase reporter assay//qRT-PCR//Western blot	Functional MTI	23527086
	hsa-miR-24-1-5p	Homo sapiens	SLITRK1	GFP reporter assay//In situ hybridization//Luciferase reporter assay	Functional MTI	16224024
	hsa-miR-155-5p	Homo sapiens	SMAD1	Luciferase reporter assay//qRT-PCR//Western blot	Functional MTI	20427544
	hsa-miR-125a-5p	Homo sapiens	SMAD2	Luciferase reporter assay	Functional MTI	27388239
	hsa-miR-145-5p	Homo sapiens	SMAD3	Luciferase reporter assay//Western blot//qRT-PCR//ELISA//Immunofluorescence	Functional MTI	24873879
	hsa-miR-125a-5p	Homo sapiens	SMAD4	Luciferase reporter assay//Western blot	Functional MTI	22357933
	hsa-miR-135b-5p	Homo sapiens	SMAD5	Luciferase reporter assay//Microarray//qRT-PCR//Western blot	Functional MTI	24223191
	hsa-miR-106b-5p	Homo sapiens	SMAD7	Luciferase reporter assay//qRT-PCR//Western blot	Functional MTI	22286770
	hsa-miR-155-5p	Homo sapiens	SMARCA4	Reporter assay;Other	Functional MTI	20584899
	hsa-miR-99a-5p	Homo sapiens	SMARCA5	Luciferase reporter assay//Microarray//qRT-PCR//Western blot	Functional MTI	24312487
	hsa-miR-192-5p	Homo sapiens	SMARCB1	Luciferase reporter assay//qRT-PCR//Reporter assay;Microarray;Other	Functional MTI	19074876
	hsa-miR-7-5p	Homo sapiens	SMARCD1	Luciferase reporter assay//qRT-PCR//Western blot	Functional MTI	26542803
	hsa-miR-182-5p	Homo sapiens	SMARCD3	Luciferase reporter assay	Functional MTI	23249749
	hsa-miR-146a-5p	Homo sapiens	SMN1	Luciferase reporter assay//qRT-PCR//Western blot//Caspase-Glo® 3/7 assay//Cell proliferation assay	Functional MTI	22020746
	hsa-miR-125b-5p	Homo sapiens	SMO	Luciferase reporter assay//Western blot	Functional MTI	20216554
	hsa-miR-140-5p	Homo sapiens	SMURF1	Immunohistochemistry//Luciferase reporter assay//qRT-PCR//Western blot	Functional MTI	27214554
	hsa-miR-204-5p	Homo sapiens	SNAI1	Luciferase reporter assay	Non-Functional MTI	20056717
	hsa-miR-182-5p	Homo sapiens	SNAI2	Luciferase reporter assay	Functional MTI	23354685
	hsa-miR-27a-5p	Homo sapiens	SNAP25	Luciferase reporter assay//Microarray//Western blot	Functional MTI	28356525
	hsa-miR-7-5p	Homo sapiens	SNCA	qRT-PCR//Luciferase reporter assay//Western blot	Functional MTI	19628698
	hsa-miR-140-5p	Homo sapiens	SNORD12C	Luciferase reporter assay	Functional MTI	27165343
	hsa-let-7i-5p	Homo sapiens	SOCS1	Luciferase reporter assay	Functional MTI	21742974
	hsa-miR-424-5p	Homo sapiens	SOCS2	Luciferase reporter assay	Functional MTI	27038552
	hsa-miR-155-5p	Homo sapiens	SOCS6	Luciferase reporter assay//qRT-PCR//Western blot	Functional MTI	26692956
	hsa-miR-145-5p	Homo sapiens	SOCS7	Luciferase reporter assay	Functional MTI	23392170
	hsa-miR-21-5p	Homo sapiens	SOD3	Luciferase reporter assay	Functional MTI	22836756
	hsa-miR-146a-5p	Homo sapiens	SOS1	Western blot//Luciferase reporter assay	Functional MTI	25469565
	hsa-miR-204-5p	Homo sapiens	SOST	Luciferase reporter assay	Functional MTI	23472141
	hsa-miR-200a-5p	Homo sapiens	SOX17	Luciferase reporter assay	Functional MTI	26277621
	hsa-miR-140-5p	Homo sapiens	SOX2	Luciferase reporter assay	Functional MTI	23060440
	hsa-miR-140-5p	Homo sapiens	SOX4	Luciferase reporter assay//qRT-PCR//Western blot	Functional MTI	27353653
	hsa-miR-15a-5p	Homo sapiens	SOX5	Luciferase reporter assay//Western blot	Functional MTI	25305446
	hsa-miR-155-5p	Homo sapiens	SOX6	Luciferase reporter assay//qRT-PCR//Western blot	Functional MTI	21989846
	hsa-miR-101-5p	Homo sapiens	SOX9	Luciferase reporter assay//qRT-PCR//Western blot	Functional MTI	27911279
	hsa-miR-133b	Homo sapiens	SP1	Immunofluorescence//Luciferase reporter assay//Western blot	Functional MTI	24613927
	hsa-miR-145-5p	Homo sapiens	SP7	Luciferase reporter assay//qRT-PCR//Western blot	Functional MTI	23886710
	hsa-miR-141-5p	Homo sapiens	SPAG9	Luciferase reporter assay//qRT-PCR//Western blot	Functional MTI	26790956
	hsa-miR-211-5p	Homo sapiens	SPARC	Immunohistochemistry//Luciferase reporter assay//qRT-PCR//Western blot	Functional MTI	27230656
	hsa-miR-204-5p	Homo sapiens	SPDEF	Luciferase reporter assay//Western blot	Functional MTI	18922924
	hsa-miR-125b-5p	Homo sapiens	SPHK1	Luciferase reporter assay	Functional MTI	26807182
	hsa-miR-155-5p	Homo sapiens	SPI1	Luciferase reporter assay	Functional MTI	19386588
	hsa-miR-126-5p	Homo sapiens	SPRED1	Luciferase reporter assay//Microarray//qRT-PCR//Western blot	Functional MTI	28100645
	hsa-miR-122-5p	Homo sapiens	SPRY2	Luciferase reporter assay//Microarray//qRT-PCR//Western blot	Functional MTI	27943426
	hsa-miR-145-5p	Homo sapiens	SPTBN1	Luciferase reporter assay	Functional MTI	25354783
	hsa-miR-145-5p	Homo sapiens	SPTLC1	Luciferase reporter assay	Functional MTI	25354783
	hsa-miR-205-5p	Homo sapiens	SRC	Reporter assay	Functional MTI	21330408
	hsa-miR-873-5p	Homo sapiens	SRCIN1	Luciferase reporter assay//qRT-PCR//Western blot	Functional MTI	26807196
	hsa-miR-122-5p	Homo sapiens	SRF	Luciferase reporter assay//qRT-PCR//Western blot	Functional MTI	19726678
	hsa-miR-145-5p	Homo sapiens	SRGAP1	In situ hybridization//Luciferase reporter assay//qRT-PCR//western blot	Functional MTI	21276775
	hsa-miR-29a-3p	Homo sapiens	SRGAP2	Luciferase reporter assay	Functional MTI	24085298
	hsa-miR-10b-5p	Homo sapiens	SRSF1	Luciferase reporter assay	Functional MTI	21118818
	hsa-miR-211-5p	Homo sapiens	SSRP1	Luciferase reporter assay//Microarray//qRT-PCR//Western blot	Functional MTI	24039954
	hsa-miR-222-5p	Homo sapiens	SSSCA1	Luciferase reporter assay//qRT-PCR//Western blot	Functional MTI	26398571
	hsa-miR-155-5p	Homo sapiens	SSX2IP	Reporter assay;Other	Non-Functional MTI	20584899
	hsa-miR-29a-5p	Homo sapiens	ST2	Luciferase reporter assay//qRT-PCR//Western blot	Functional MTI	25857925
	hsa-miR-26a-5p	Homo sapiens	ST3GAL6	Immunohistochemistry//Luciferase reporter assay//qRT-PCR//Western blot	Functional MTI	27906498
	hsa-miR-26a-5p	Homo sapiens	ST8SIA4	Immunofluorescence//Luciferase reporter assay//qRT-PCR//Western blot	Functional MTI	28032858
	hsa-miR-125b-5p	Homo sapiens	STARD13	Luciferase reporter assay	Functional MTI	22693547
	hsa-miR-140-5p	Homo sapiens	STAT1	Luciferase reporter assay//Western blot	Functional MTI	26780721
	hsa-miR-106b-5p	Homo sapiens	STAT3	Luciferase reporter assay//qRT-PCR//Western blot	Functional MTI	25307786
	hsa-miR-134-5p	Homo sapiens	STAT5B	Immunoblot//Luciferase reporter assay//qRT-PCR//Western blot	Functional MTI	24440911
	hsa-miR-1207-5p	Homo sapiens	STAT6	Luciferase reporter assay//qRT-PCR//Western blot	Functional MTI	28235236
	hsa-miR-93-5p	Homo sapiens	STK11	Luciferase reporter assay	Functional MTI	28382150
	hsa-miR-133b	Homo sapiens	STK3	Luciferase reporter assay//qRT-PCR//Western blot//Immunoblot//Microarray	Functional MTI	22179829
	hsa-miR-18a-5p	Homo sapiens	STK4	Immunohistochemistry//In situ hybridization//Luciferase reporter assay//qRT-PCR//Western blot	Functional MTI	24752237
	hsa-miR-101-5p	Homo sapiens	STMN1	Immunofluorescence//Luciferase reporter assay//qRT-PCR//Western blot	Functional MTI	25607713
	hsa-miR-1207-5p	Homo sapiens	STOML2	Luciferase reporter assay//qRT-PCR//Western blot	Functional MTI	25695396
	hsa-miR-34a-5p	Homo sapiens	STX1A	Luciferase reporter assay//Western blot	Functional MTI	22160687
	hsa-miR-145-5p	Homo sapiens	SWAP70	Luciferase reporter assay//Reporter assay;Western blot;qRT-PCR	Functional MTI	21360565
	hsa-miR-96-5p	Homo sapiens	SYCP1	Luciferase reporter assay	Functional MTI	23313552
	hsa-miR-34a-5p	Homo sapiens	SYT1	Luciferase reporter assay//Western blot	Functional MTI	22160687
	hsa-miR-29a-5p	Homo sapiens	TAB1	ELISA//Luciferase reporter assay//qRT-PCR//Western blot	Functional MTI	25549087
	hsa-miR-142-3p	Homo sapiens	TAB2	Luciferase reporter assay//Western blot	Functional MTI	22493297
	hsa-miR-22-3p	Homo sapiens	TACC1	Chromatin immunoprecipitation//FACS//Immunohistochemistry//Luciferase reporter assay//Microarray//Next Generation Sequencing (NGS)//Northern blot//qRT-PCR//Western blot	Functional MTI	27569217
	hsa-miR-155-5p	Homo sapiens	TAF5L	Reporter assay;Other	Functional MTI	20584899
	hsa-miR-133b	Homo sapiens	TAGLN2	Immunoflourescence//Luciferase reporter assay//QRTPCR//Western blot	Functional MTI	24959893
	hsa-miR-21-5p	Homo sapiens	TAP1	Luciferase reporter assay//Western blot	Functional MTI	25327529
	hsa-miR-125a-5p	Homo sapiens	TAZ	Luciferase reporter assay	Functional MTI	27094723
	hsa-miR-125b-5p	Homo sapiens	TBC1D1	Luciferase reporter assay	Functional MTI	19635812
	hsa-miR-155-5p	Homo sapiens	TBC1D14	Reporter assay;Other	Functional MTI	20584899
	hsa-miR-155-5p	Homo sapiens	TBC1D8B	Reporter assay;Other	Non-Functional MTI	20584899
	hsa-miR-155-5p	Homo sapiens	TBCA	Reporter assay;Other	Non-Functional MTI	20584899
	hsa-miR-18a-5p	Homo sapiens	TBPL1	Luciferase reporter assay//qRT-PCR//Western blot	Functional MTI	26398009
	hsa-miR-155-5p	Homo sapiens	TBRG1	ChIP-seq//Western blot//Luciferase reporter assay	Functional MTI	26497687
	hsa-miR-122-5p	Homo sapiens	TBX19	Luciferase reporter assay//qRT-PCR	Functional MTI	19296470
	hsa-miR-137	Homo sapiens	TBX3	Luciferase reporter assay	Functional MTI	24084696
	hsa-miR-106b-5p	Homo sapiens	TCEAL1	Luciferase reporter assay//qRT-PCR//Western blot	Functional MTI	21283757
	hsa-miR-182-5p	Homo sapiens	TCEAL7	Luciferase reporter assay//qRT-PCR//Western blot	Functional MTI	24021963
	hsa-miR-335-5p	Homo sapiens	TCEAL9	Luciferase reporter assay//qRT-PCR//Western blot	Functional MTI	27336605
	hsa-miR-155-5p	Homo sapiens	TCF12	Reporter assay;Other	Non-Functional MTI	20584899
	hsa-miR-21-5p	Homo sapiens	TCF21	Luciferase reporter assay	Functional MTI	23206776
	hsa-miR-204-5p	Homo sapiens	TCF4	Luciferase reporter assay//Microarray//qRT-PCR	Functional MTI	21282569
	hsa-miR-22-3p	Homo sapiens	TCF7	//Luciferase reporter assay//qRT-PCR//Western blot	Functional MTI	26193896
	hsa-miR-200a-3p	Homo sapiens	TCF7L1	Reporter assay	Functional MTI	20005803
	hsa-miR-26a-5p	Homo sapiens	TDG	Luciferase reporter assay	Functional MTI	24114270
	hsa-miR-155-5p	Homo sapiens	TERF1	Luciferase reporter assay//Western blotting//immunohistochemistry	Functional MTI	24876105
	hsa-miR-1207-5p	Homo sapiens	TERT	Immunohistochemistry//Luciferase reporter assay//Microarray//qRT-PCR//Western blot	Functional MTI	24481448
	hsa-miR-29a-3p	Homo sapiens	TET1	Luciferase reporter assay//qRT-PCR//Western blot	Functional MTI	23857059
	hsa-miR-125b-5p	Homo sapiens	TET2	Luciferase reporter assay	Functional MTI	24120864
	hsa-miR-29a-3p	Homo sapiens	TET3	Luciferase reporter assay//Microarray//qRT-PCR//Western blot	Functional MTI	23820384
	hsa-miR-155-5p	Homo sapiens	TFAM	Luciferase reporter assay//qRT-PCR	Functional MTI	25869329
	hsa-miR-10b-5p	Homo sapiens	TFAP2C	Luciferase reporter assay//Western blot	Functional MTI	21471404
	hsa-miR-29a-3p	Homo sapiens	TFEB	Luciferase reporter assay//Western blot	Functional MTI	27626694
	hsa-miR-423-5p	Homo sapiens	TFF1	Luciferase reporter assay//qRT-PCR//Western blot	Functional MTI	24486742
	hsa-miR-335-5p	Homo sapiens	TFF2	Luciferase reporter assay//qRT-PCR//Western blot	Functional MTI	21822301
	hsa-miR-22-3p	Homo sapiens	TFRC	Luciferase reporter assay//Northern blot//flow	Functional MTI	19135902
	hsa-miR-146a-5p	Homo sapiens	TGFB1	ELISA//Luciferase reporter assay//qRT-PCR//Western blot	Functional MTI	28337286
	hsa-miR-137	Homo sapiens	TGFB2	Luciferase reporter assay//qRT-PCR//Western blot	Functional MTI	24465609
	hsa-miR-21-5p	Homo sapiens	TGFBI	Luciferase reporter assay//Western blot	Functional MTI	19136465
	hsa-let-7b-5p	Homo sapiens	TGFBR1	GFP reporter assay//Western blot//ELISA	Functional MTI	24978044
	hsa-miR-145-5p	Homo sapiens	TGFBR2	Luciferase reporter assay//qRT-PCR//Western blot	Functional MTI	23986572
	hsa-miR-21-5p	Homo sapiens	TGFBR3	Luciferase reporter assay//qRT-PCR	Functional MTI	18829576
	hsa-miR-148a-5p	Homo sapiens	TGIF2	Luciferase reporter assay//qRT-PCR	Functional MTI	26638007
	hsa-miR-182-5p	Homo sapiens	THBS1	Luciferase reporter assay	Functional MTI	24053448
	hsa-miR-142-3p	Homo sapiens	THBS4	Luciferase reporter assay//qRT-PCR//Western blot	Functional MTI	28177895
	hsa-miR-155-5p	Homo sapiens	THRB	Luciferase reporter assay//Real time PCR	Functional MTI	24849932
	hsa-miR-10b-5p	Homo sapiens	TIAM1	Luciferase reporter assay//qRT-PCR//Western blot	Functional MTI	24481854
	hsa-miR-21-5p	Homo sapiens	TICAM2	Luciferase reporter assay//Western blot	Functional MTI	25327529
	hsa-miR-375	Homo sapiens	TIMM8A	Luciferase reporter assay	Functional MTI	19734348
	hsa-miR-429	Homo sapiens	TIMP2	Luciferase reporter assay//Western blot	Functional MTI	24866238
	hsa-miR-21-5p	Homo sapiens	TIMP3	Luciferase reporter assay//Western blot//qRT-PCR//Reporter assay;Western blot;qRT-PCR;Microarray;Other	Functional MTI	18591254
	hsa-miR-212-5p	Homo sapiens	TJP1	Luciferase reporter assay//Western blot	Functional MTI	26692142
	hsa-miR-155-5p	Homo sapiens	TLE4	Reporter assay;Other	Functional MTI	20584899
	hsa-miR-101-5p	Homo sapiens	TLR2	ELISA//Luciferase reporter assay//qRT-PCR//Western blot	Functional MTI	26022377
	hsa-miR-21-5p	Homo sapiens	TLR3	Luciferase reporter assay//Western blot	Functional MTI	25327529
	hsa-let-7b-5p	Homo sapiens	TLR4	Luciferase reporter assay	Functional MTI	23437218
	hsa-miR-155-5p	Homo sapiens	TM6SF1	Luciferase reporter assay//Reporter assay;Other	Functional MTI	17881434
	hsa-miR-21-5p	Homo sapiens	TM9SF3	Luciferase reporter assay	Functional MTI	19253296
	hsa-miR-191-5p	Homo sapiens	TMC7	Immunohistochemistry//Immunoprecipitaion//Luciferase reporter assay//Microarray//qRT-PCR	Functional MTI	20924108
	hsa-miR-15a-5p	Homo sapiens	TMEM184B	Luciferase reporter assay//Reporter assay	Non-Functional MTI	15131085
	hsa-miR-145-5p	Homo sapiens	TMEM9B	Reporter assay;Microarray	Functional MTI	21351259
	hsa-miR-145-5p	Homo sapiens	TMOD3	Luciferase reporter assay//Reporter assay;Other	Non-Functional MTI	15131085
	hsa-miR-204-5p	Homo sapiens	TMPRSS3	Luciferase reporter assay//Western blot//qRT-PCR	Functional MTI	24924414
	hsa-miR-335-5p	Homo sapiens	TNC	Immunohistochemistry//Luciferase reporter assay//Microarray//Microarray;Other	Functional MTI	18185580
	hsa-miR-125b-5p	Homo sapiens	TNF	ChIP//Luciferase reporter assay//qRT-PCR//Western blot	Functional MTI	26435691
	hsa-miR-15a-5p	Homo sapiens	TNFAIP1	Luciferase reporter assay//qRT-PCR//Western blot	Functional MTI	26261520
	hsa-miR-125a-5p	Homo sapiens	TNFAIP3	Luciferase reporter assay//qRT-PCR//Western blot	Functional MTI	26758190
	hsa-miR-106b-5p	Homo sapiens	TNFRSF10A	Flow//Luciferase reporter assay//qRT-PCR//Western blot	Functional MTI	28410209
	hsa-miR-21-5p	Homo sapiens	TNFRSF10B	Luciferase reporter assay	Functional MTI	25118289
	hsa-miR-106b-5p	Homo sapiens	TNFSF11	ELISA//Immunofluorescence//Immunohistochemistry//In situ hybridization//Luciferase reporter assay//Microarray//Northern blot//qRT-PCR//Western blot	Functional MTI	26053181
	hsa-miR-145-5p	Homo sapiens	TNFSF13	Immunohistochemistry//Luciferase reporter assay//qRT-PCR//Western blot	Functional MTI	25612651
	hsa-miR-155-5p	Homo sapiens	TOMM20	Reporter assay;Other	Non-Functional MTI	20584899
	hsa-miR-21-5p	Homo sapiens	TOPORS	Luciferase reporter assay//qRT-PCR	Functional MTI	18829576
	hsa-miR-10b-5p	Homo sapiens	TP53	Luciferase reporter assay	Functional MTI	23034333
	hsa-miR-182-5p	Homo sapiens	TP53BP1	Luciferase reporter assay	Functional MTI	23249749
	hsa-miR-21-5p	Homo sapiens	TP53BP2	Luciferase reporter assay//qRT-PCR	Functional MTI	18829576
	hsa-miR-125b-5p	Homo sapiens	TP53INP1	Luciferase reporter assay//Northern blot//qRT-PCR//Western blot	Functional MTI	21970405
	hsa-miR-21-5p	Homo sapiens	TP63	Luciferase reporter assay//qRT-PCR//Western blot	Functional MTI	18829576
	hsa-miR-200a-3p	Homo sapiens	TP73-AS1	ELISA//Luciferase reporter assay//qRT-PCR//Western blot	Functional MTI	28403886
	hsa-miR-122-5p	Homo sapiens	TPD52L2	Luciferase reporter assay//qRT-PCR	Functional MTI	19296470
	hsa-miR-21-5p	Homo sapiens	TPM1	Luciferase reporter assay//Western blot//Western blot;qRT-PCR	Functional MTI	17363372
	hsa-miR-145-5p	Homo sapiens	TPM3	Reporter assay;Microarray	Functional MTI	21351259
	hsa-miR-16-5p	Homo sapiens	TPPP3	Luciferase reporter assay//Reporter assay;Other	Functional MTI	15131085
	hsa-miR-145-5p	Homo sapiens	TPRG1	Reporter assay;Microarray	Functional MTI	21351259
	hsa-miR-10b-5p	Homo sapiens	TRA2B	Luciferase reporter assay	Functional MTI	21118818
	hsa-miR-29a-3p	Homo sapiens	TRAF4	Luciferase reporter assay	Functional MTI	24100420
	hsa-miR-125a-5p	Homo sapiens	TRAF6	Luciferase reporter assay//qRT-PCR//Western blot	Functional MTI	24360988
	hsa-miR-21-5p	Homo sapiens	TRAF7	In situ hybridization//Luciferase reporter assay//Northern blot//qRT-PCR//Western blot	Functional MTI	26080425
	hsa-miR-155-5p	Homo sapiens	TRAK1	Reporter assay;Other	Functional MTI	20584899
	hsa-miR-192-5p	Homo sapiens	TRAPPC2B	Luciferase reporter assay	Functional MTI	18835392
	hsa-miR-34a-5p	Homo sapiens	TREM2	Luciferase reporter assay//Microarray//qRT-PCR//Western blot	Functional MTI	26949937
	hsa-miR-122-5p	Homo sapiens	TRIB1	Luciferase reporter assay//qRT-PCR	Functional MTI	19296470
	hsa-miR-99a-5p	Homo sapiens	TRIB2	Luciferase reporter assay	Functional MTI	24191888
	hsa-miR-96-5p	Homo sapiens	TRIB3	Immunoblot//Luciferase reporter assay//qRT-PCR	Functional MTI	24375867
	hsa-miR-137	Homo sapiens	TRIM13	Luciferase reporter assay//qRT-PCR//Western blot//microarray	Functional MTI	23934188
	hsa-miR-15b-5p	Homo sapiens	TRIM29	Luciferase reporter assay	Functional MTI	26872369
	hsa-miR-155-5p	Homo sapiens	TRIM32	ChIP-seq//Luciferase reporter assay//Western blot	Functional MTI	26497687
	hsa-miR-29a-3p	Homo sapiens	TRIM68	Luciferase reporter assay//qRT-PCR//Western blot	Functional MTI	22805767
	hsa-miR-106b-5p	Homo sapiens	TRIM8	Luciferase reporter assay//qRT-PCR//Western blot	Functional MTI	28327152
	hsa-miR-155-5p	Homo sapiens	TRIP13	Reporter assay;Other	Functional MTI	20584899
	hsa-miR-26a-5p	Homo sapiens	TRPC6	Luciferase reporter assay	Functional MTI	25801675
	hsa-miR-451a	Homo sapiens	TSC1	Flow//Luciferase reporter assay//qRT-PCR//Western blot	Functional MTI	25915427
	hsa-miR-182-5p	Homo sapiens	TSC22D3	Luciferase reporter assay//qRT-PCR	Functional MTI	20656788
	hsa-miR-155-5p	Homo sapiens	TSHZ3	Luciferase reporter assay	Functional MTI	19177201
	hsa-miR-155-5p	Homo sapiens	TSPAN14	Reporter assay;Other	Functional MTI	20584899
	hsa-miR-145-5p	Homo sapiens	TSPAN6	Reporter assay;Microarray	Functional MTI	21351259
	hsa-miR-15a-5p	Homo sapiens	TSPYL2	Luciferase reporter assay	Functional MTI	19478946
	hsa-miR-155-5p	Homo sapiens	TTF1	Reporter assay;Other	Non-Functional MTI	20584899
	hsa-miR-145-5p	Homo sapiens	TUG1	Immunohistochemistry//Luciferase reporter assay//qRT-PCR	Functional MTI	27983921
	hsa-miR-93-5p	Homo sapiens	TUSC2	Luciferase reporter assay//Western blot	Functional MTI	19671678
	hsa-miR-106b-5p	Homo sapiens	TWIST1	Luciferase reporter assay//qRT-PCR//Western blot	Functional MTI	24002805
	hsa-miR-27a-5p	Homo sapiens	TXN2	Luciferase reporter assay//Microarray//Western blot	Functional MTI	28356525
	hsa-miR-204-5p	Homo sapiens	TXNIP	Luciferase reporter assay	Functional MTI	27121770
	hsa-miR-122-5p	Homo sapiens	UBAP2	Luciferase reporter assay//qRT-PCR	Functional MTI	19296470
	hsa-miR-200a-3p	Homo sapiens	UBASH3B	Immunohistochemistry//Luciferase reporter assay//Microarray//qRT-PCR//Western blot	Functional MTI	23784775
	hsa-miR-7-5p	Homo sapiens	UBE2A	Luciferase reporter assay	Functional MTI	27929395
	hsa-miR-335-5p	Homo sapiens	UBE2F	Luciferase reporter assay	Non-Functional MTI	18185580
	hsa-miR-21-5p	Homo sapiens	UBE2N	Luciferase reporter assay//Western blot	Functional MTI	25327529
	hsa-miR-155-5p	Homo sapiens	UBQLN1	Reporter assay;Other	Functional MTI	20584899
	hsa-miR-155-5p	Homo sapiens	UBTD2	Reporter assay;Other	Non-Functional MTI	20584899
	hsa-miR-16-5p	Homo sapiens	UCA1	Luciferase reporter assay//qRT-PCR//Western blot	Functional MTI	26373319
	hsa-miR-15a-5p	Homo sapiens	UCP2	Luciferase reporter assay//qRT-PCR	Functional MTI	21146880
	hsa-miR-146a-5p	Homo sapiens	UHRF1	Immunohistochemistry//Luciferase reporter assay//Microarray//Western blot	Functional MTI	23982143
	hsa-miR-182-5p	Homo sapiens	ULBP2	Luciferase reporter assay//qRT-PCR//Western blot	Functional MTI	23956116
	hsa-miR-16-5p	Homo sapiens	UNG	Luciferase reporter assay	Functional MTI	23228472
	hsa-miR-155-5p	Homo sapiens	UPF2	Reporter assay;Other	Non-Functional MTI	20584899
	hsa-miR-155-5p	Homo sapiens	UQCRFS1	Luciferase reporter assay//Western blot	Functional MTI	20550618
	hsa-miR-10a-5p	Homo sapiens	USF2	Luciferase reporter assay//qRT-PCR//Western blot	Functional MTI	19074828
	hsa-miR-375	Homo sapiens	USP1	Reporter assay	Functional MTI	15806104
	hsa-miR-204-5p	Homo sapiens	USP47	Immunohistochemistry//Luciferase reporter assay//qRT-PCR//Western blot	Functional MTI	25429829
	hsa-miR-205-5p	Homo sapiens	UVRAG	Luciferase reporter assay//qRT-PCR//Western blot	Functional MTI	26181203
	hsa-miR-200a-3p	Homo sapiens	VAC14	Reporter assay	Functional MTI	20005803
	hsa-miR-34a-5p	Homo sapiens	VAMP2	Luciferase reporter assay	Functional MTI	14697198
	hsa-miR-29a-3p	Homo sapiens	VDAC1	Luciferase reporter assay//qRT-PCR//Western blot	Functional MTI	22952654
	hsa-miR-125b-5p	Homo sapiens	VDR	Luciferase reporter assay//Western blot	Functional MTI	19437538
	hsa-miR-101-5p	Homo sapiens	VEGFA	Luciferase reporter assay//qRT-PCR//Western blot	Functional MTI	26870229
	hsa-miR-122-5p	Homo sapiens	VEGFC	ELISA//Luciferase reporter assay//qRT-PCR//Western blot	Functional MTI	27508026
	hsa-miR-155-5p	Homo sapiens	VHL	Luciferase reporter assay//qRT-PCR	Functional MTI	23353819
	hsa-miR-134-5p	Homo sapiens	VIM	Luciferase reporter assay//qRT-PCR//Western blot	Functional MTI	26137169
	hsa-miR-155-5p	Homo sapiens	VPS18	Reporter assay	Functional MTI	20584899
	hsa-miR-125b-5p	Homo sapiens	VPS4B	Luciferase reporter assay	Functional MTI	25403182
	hsa-miR-125a-5p	Homo sapiens	VPS51	Luciferase reporter assay	Functional MTI	25172656
	hsa-miR-146a-5p	Homo sapiens	WASF2	Luciferase reporter assay	Functional MTI	23435376
	hsa-miR-200a-3p	Homo sapiens	WASF3	Luciferase reporter assay	Functional MTI	19801681
	hsa-miR-155-5p	Homo sapiens	WBP1L	Reporter assay;Other	Functional MTI	20584899
	hsa-miR-200a-3p	Homo sapiens	WDR37	Reporter assay	Functional MTI	20005803
	hsa-miR-106b-5p	Homo sapiens	WEE1	Luciferase reporter assay	Functional MTI	21283765
	hsa-miR-141-5p	Homo sapiens	WNK1	Luciferase reporter assay	Functional MTI	26378023
	hsa-miR-122-5p	Homo sapiens	WNT1	Luciferase reporter assay//qRT-PCR//Western blot	Functional MTI	22276989
	hsa-miR-15a-5p	Homo sapiens	WNT3A	Luciferase reporter assay	Functional MTI	18931683
	hsa-miR-155-5p	Homo sapiens	WWC1	Reporter assay;Other	Functional MTI	20584899
	hsa-miR-192-5p	Homo sapiens	XIAP	qRT-PCR//Luciferase reporter assay//Immunohistochemistry//Western blot	Functional MTI	25444916
	hsa-miR-122-5p	Homo sapiens	XPO6	Luciferase reporter assay//qRT-PCR	Functional MTI	19296470
	hsa-miR-7-5p	Homo sapiens	XRCC2	Luciferase reporter assay//qRT-PCR//Western blot	Functional MTI	24570594
	hsa-miR-15a-5p	Homo sapiens	YAP1	Flow//Luciferase reporter assay//qRT-PCR//Western blot	Functional MTI	25743273
	hsa-miR-137	Homo sapiens	YBX1	Luciferase reporter assay	Functional MTI	23178914
	hsa-miR-191-5p	Homo sapiens	YBX3	Immunoprecipitation//In situ hybridization//Luciferase assay//Microarray//Northern blot//QRTPCR//Western blot	Functional MTI	23505378
	hsa-miR-145-5p	Homo sapiens	YES1	qRT-PCR//Luciferase reporter assay//Western blot//Microarray	Functional MTI	20098684
	hsa-miR-509-5p	Homo sapiens	YWHAG	Luciferase reporter assay//qRT-PCR//Western blot	Functional MTI	27894843
	hsa-miR-155-5p	Homo sapiens	YWHAZ	Reporter assay;Other	Non-Functional MTI	20584899
	hsa-miR-205-5p	Homo sapiens	YY1	Luciferase reporter assay//qRT-PCR//Western blot	Functional MTI	24763883
	hsa-miR-375	Homo sapiens	YY1AP1	Luciferase reporter assay//Western blot	Functional MTI	20226166
	hsa-miR-34a-5p	Homo sapiens	ZAP70	Immunoblot//Luciferase reporter assay	Functional MTI	21205967
	hsa-miR-149-5p	Homo sapiens	ZBTB2	Immunohistochemistry//Luciferase reporter assay//qRT-PCR//Western blot	Functional MTI	23144691
	hsa-miR-106b-5p	Homo sapiens	ZBTB4	Luciferase reporter assay//qRT-PCR//Western blot	Functional MTI	22752225
	hsa-miR-100-5p	Homo sapiens	ZBTB7A	5RACE//Immunohistochemistry//Luciferase reporter assay//qRT-PCR//Western blot	Functional MTI	26404754
	hsa-miR-26a-5p	Homo sapiens	ZCCHC11	Immunohistochemistry//Luciferase reporter assay//qRT-PCR//Western blot	Functional MTI	24056962
	hsa-miR-134-5p	Homo sapiens	ZDHHC9	Luciferase reporter assay	Functional MTI	24127608
	hsa-miR-10b-5p	Homo sapiens	ZEB1	Luciferase reporter assay//Western blot	Functional MTI	25896413
	hsa-miR-200a-3p	Homo sapiens	ZEB2	Luciferase reporter assay//qRT-PCR	Functional MTI	18411277
	hsa-miR-182-5p	Homo sapiens	ZFAND4	Immunofluorescence//Immunohistochemistry//Luciferase reporter assay//Microarray//qRT-PCR//Western blot	Functional MTI	25682742
	hsa-miR-29a-3p	Homo sapiens	ZFP36	Luciferase reporter assay	Functional MTI	23401122
	hsa-miR-183-5p	Homo sapiens	ZFPM1	ELISA//Immunohistochemistry//Immunoprecipitaion//Luciferase reporter assay//Microarray//qRT-PCR//Western blot	Functional MTI	24762440
	hsa-miR-200a-3p	Homo sapiens	ZFPM2	Luciferase reporter assay//Western blot//Reporter assay	Functional MTI	20005803
	hsa-miR-155-5p	Homo sapiens	ZIC3	Luciferase reporter assay	Functional MTI	18367535
	hsa-miR-940	Homo sapiens	ZNF24	Immunohistochemistry//Immunoprecipitaion//Luciferase reporter assay//qRT-PCR//Western blot	Functional MTI	26317898
	hsa-miR-155-5p	Homo sapiens	ZNF248	Reporter assay;Other	Non-Functional MTI	20584899
	hsa-miR-155-5p	Homo sapiens	ZNF254	Reporter assay;Other	Functional MTI	20584899
	hsa-miR-155-5p	Homo sapiens	ZNF28	Reporter assay;Other	Functional MTI	20584899
	hsa-miR-122-5p	Homo sapiens	ZNF395	GFP reporter assay	Functional MTI	23221562
	hsa-miR-155-5p	Homo sapiens	ZNF493	Reporter assay;Other	Non-Functional MTI	20584899
	hsa-miR-155-5p	Homo sapiens	ZNF561	Reporter assay;Other	Non-Functional MTI	20584899
	hsa-miR-155-5p	Homo sapiens	ZNF652	Luciferase reporter assay	Functional MTI	18367535
	hsa-miR-137	Homo sapiens	ZNF804A	Luciferase reporter assay	Functional MTI	22883350
	hsa-miR-155-5p	Homo sapiens	ZNF83	Reporter assay;Other	Non-Functional MTI	20584899
	hsa-miR-100-5p	Homo sapiens	ZNRF2	Luciferase reporter assay	Functional MTI	28416774
	hsa-miR-93-5p	Homo sapiens	ZNRF3	Luciferase reporter assay//qRT-PCR//Western blot	Functional MTI	26423400
	hsa-miR-16-5p	Homo sapiens	ZYX	Luciferase reporter assay//qRT-PCR//Western blot	Functional MTI	21360639

## Sheet: Table S2 Pathways
		BCL2	CCND1	CCND2	CDK6	CDKN1A	ERBB2	IGF1R	MYB	MYC	PTEN	RECK	RHOA	SMAD4	SP1	TP53	VEGFA	WEE1
	ALP23B signaling pathway (P06209)													1
	Activin beta signaling pathway (P06210)													1
	Angiogenesis (P00005)												1				1
	Angiotensin II-stimulated signaling through G proteins and beta-arrestin (P05911)												1
	Apoptosis signaling pathway (P00006)	1														1
	Axon guidance mediated by Slit/Robo (P00008)												1
	Axon guidance mediated by netrin (P00009)												1
	Axon guidance mediated by semaphorins (P00007)												1
	B cell activation (P00010)												1
	BMP/activin signaling pathway-drosophila (P06211)													1
	CCKR signaling map (P06959)	1	1							1	1		1		1
	Cadherin signaling pathway (P00012)						1
	Cell cycle (P00013)		1	1
	Cytoskeletal regulation by Rho GTPase (P00016)												1
	DPP signaling pathway (P06213)													1
	DPP-SCW signaling pathway (P06212)													1
	EGF receptor signaling pathway (P00018)						1						1
	FGF signaling pathway (P00021)												1
	GBB signaling pathway (P06214)												1
	Gonadotropin-releasing hormone receptor pathway (P06664)							1					1		1
	Heterotrimeric G-protein signaling pathway-Gq alpha and Go alpha mediated pathway (P00027)												1
	Huntington disease (P00029)												1		1	1
	Hypoxia response via HIF activation (P00030)										1
	Inflammation mediated by chemokine and cytokine signaling pathway (P00031)										1		1
	Insulin/IGF pathway-mitogen activated protein kinase kinase/MAP kinase cascade (P00032)							1
	Insulin/IGF pathway-protein kinase B signaling cascade (P00033)							1			1
	Integrin signalling pathway (P00034)												1
	Interleukin signaling pathway (P00036)					1				1
	MYO signaling pathway (P06215)													1
	Oxidative stress response (P00046)	1								1
	P53 pathway feedback loops 1 (P04392)															1
	PDGF signaling pathway (P00047)									1
	PI3 kinase pathway (P00048)		1	1							1
	Ras Pathway (P04393)												1
	SCW signaling pathway (P06216)													1
	TGF-beta signaling pathway (P00052)													1
	VEGF signaling pathway (P00056)													1
	Wnt signaling pathway (P00057)		1							1				1		1
	p53 pathway by glucose deprivation (P04397)															1
	p53 pathway feedback loops 2 (P04398)					1				1	1					1
	p53 pathway (P00059)					1					1					1
